# Supplementary material
Source: PubMed Central journal article supplement (PMC2830278)

**Synthesis of Polycyclic Nitrogen Heterocycles via Alkene  
Aminopalladation/Carbopalladation Cascade Reactions**

**Danielle M. Schultz and John P. Wolfe\***

*Department of Chemistry, University of Michigan, 930 N. University Avenue, Ann Arbor, Michigan 48109-1055*

**Supporting Information (continued)**

**<sup>1</sup>H NMR and <sup>13</sup>C NMR spectra for new compounds in eq 1–2 and Tables 1–2.**

nb3-20-1

Sample Name:

Data Collected on:

Zr.Chem.LSA.UMich.edu-inova400

Archive directory:

/export/home/chempack/vnmrsys/data

Sample directory:

FidFile: w-dms-nb3-20-1-1H

Pulse Sequence: PROTON (s2pul)

Solvent: cdcl3

Data collected on: Sep 18 2009

VARIAN 

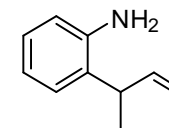

S1

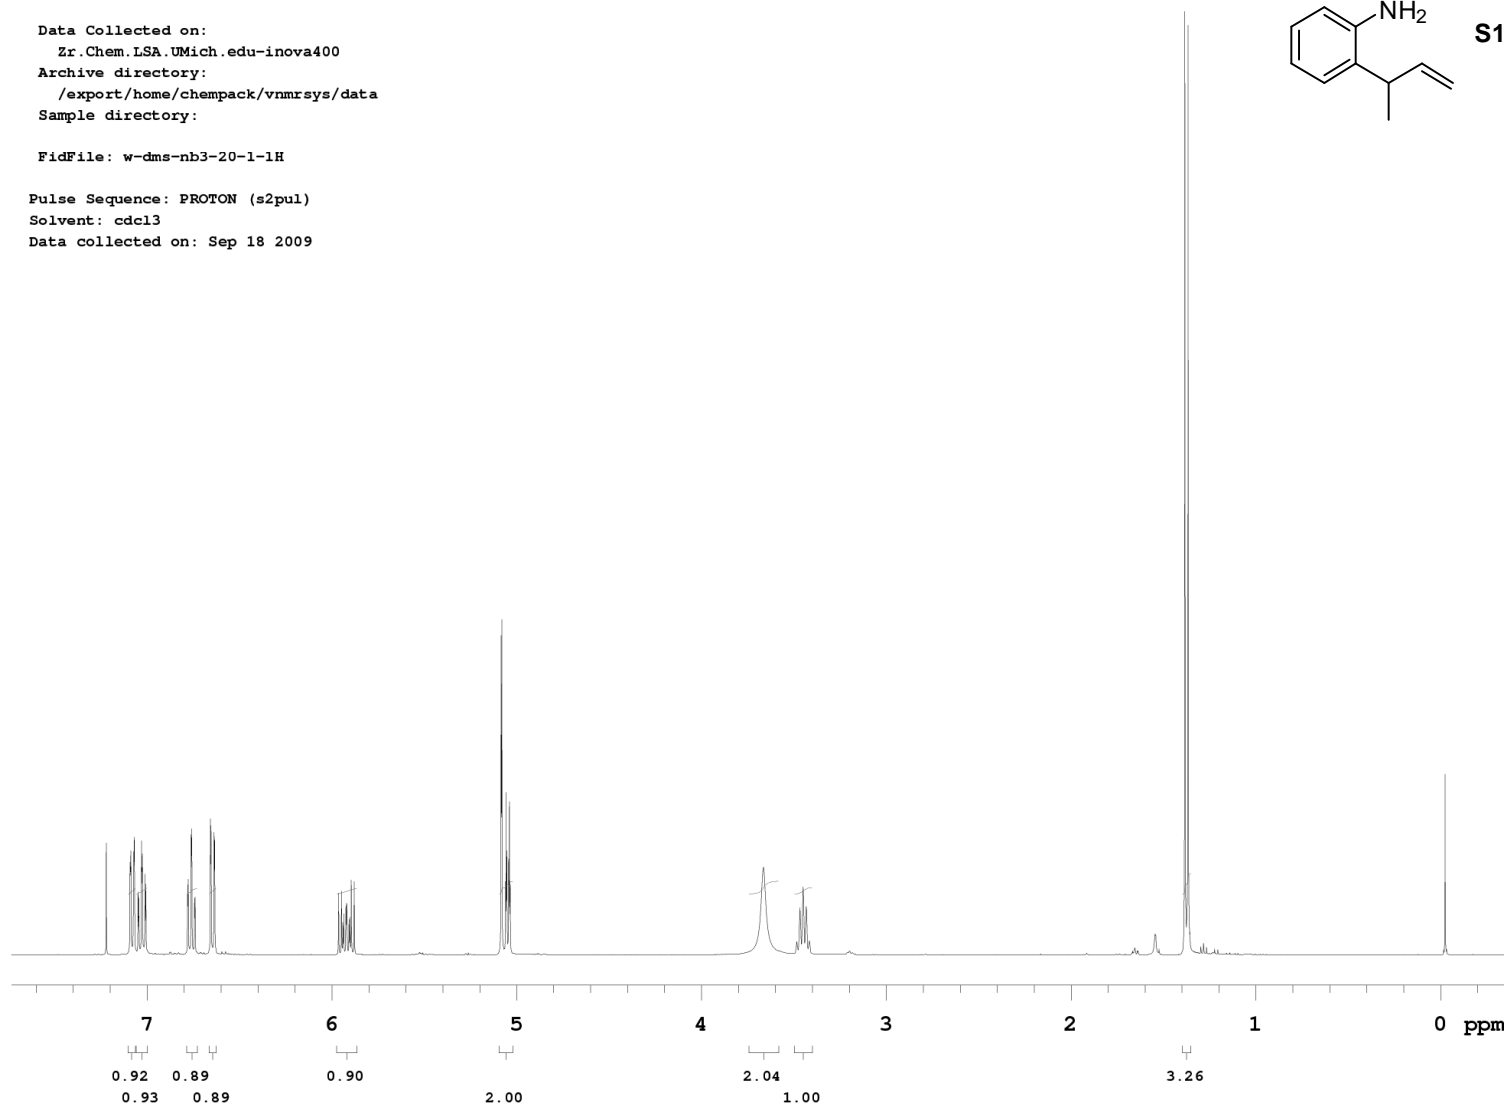

nb3-20-1

Sample Name:

Data Collected on:

Zr.Chem.LSA.UMich.edu-inova400

Archive directory:

/export/home/chempack/vnmrsys/data

Sample directory:

FidFile: w-dms-nb3-20-1-13C

Pulse Sequence: CARBON (s2pul)

Solvent: cdcl3

Data collected on: Sep 18 2009

VARIAN 

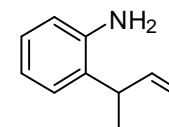

S1

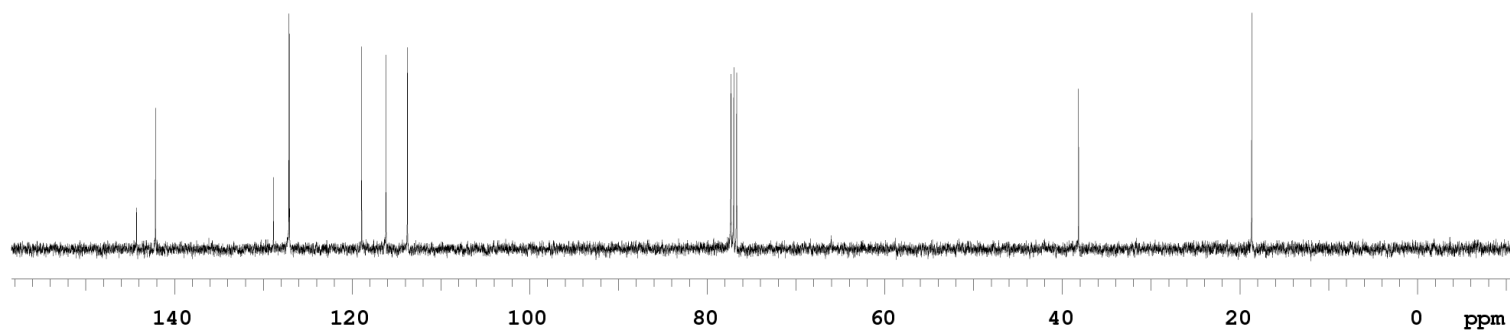

nb3-41-1

Sample Name:

Data Collected on:

Zr.Chem.LSA.UMich.edu-inova400

Archive directory:

/export/home/chempack/vnmrsys/data

Sample directory:

FidFile: w-dms-nb3-41-1-1H

Pulse Sequence: PROTON (s2pul)

Solvent: cdcl3

Data collected on: Oct 16 2009

VARIAN 

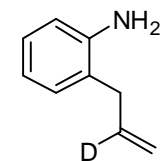

S2

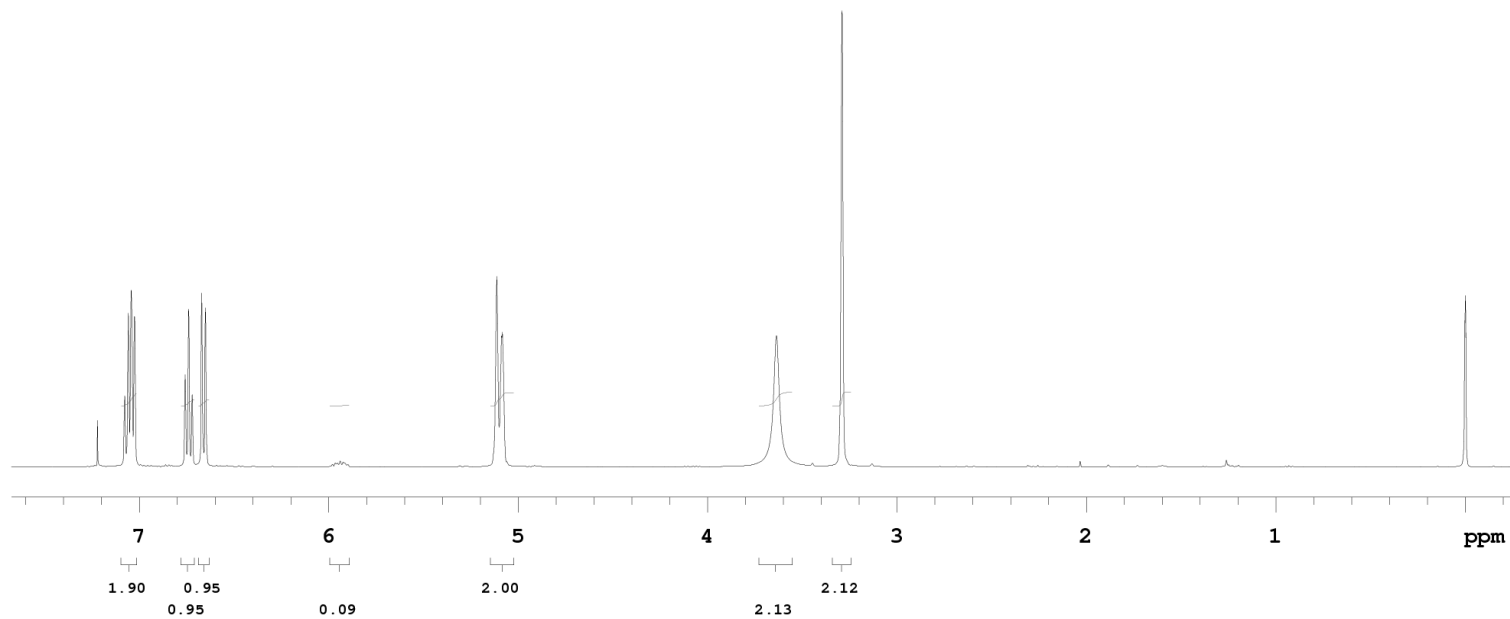

S29

nb3-41-1

Sample Name:

Data Collected on:

Zr.Chem.LSA.UMich.edu-inova400

Archive directory:

/export/home/chempack/vnmrsys/data

Sample directory:

FidFile: w-dms-nb3-41-1-13C

Pulse Sequence: CARBON (s2pul)

Solvent: cdcl3

Data collected on: Oct 16 2009

VARIAN 

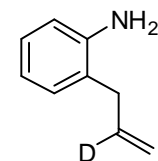

S2

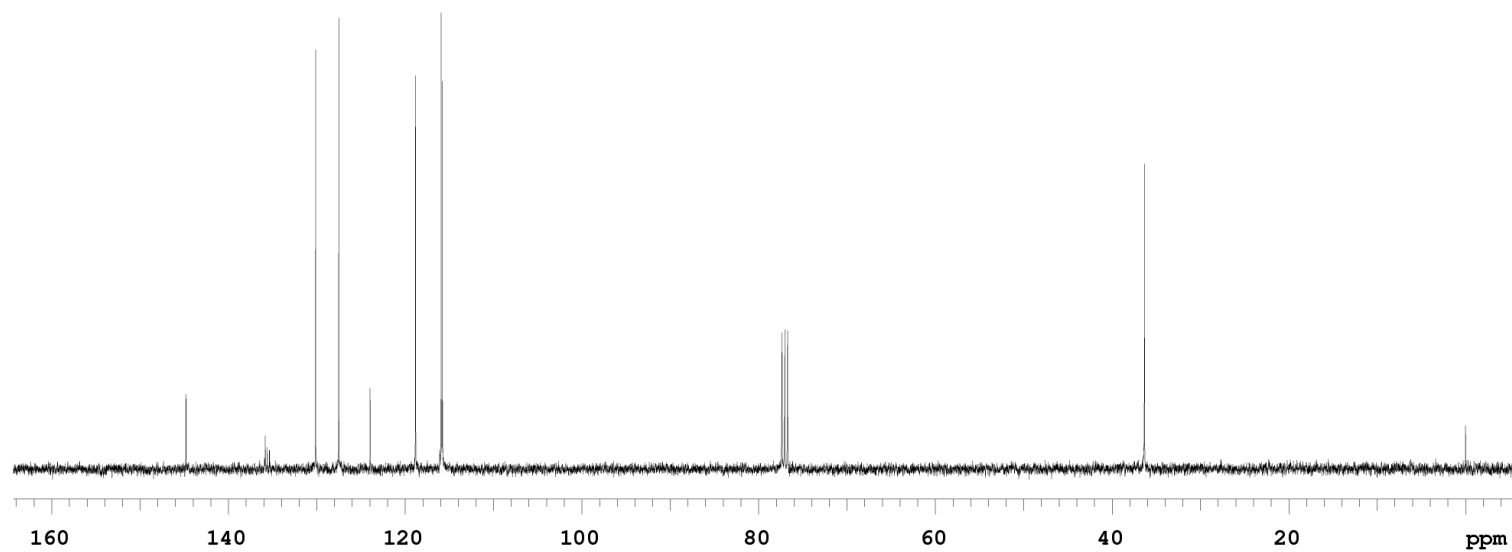

nb3-98-1

Sample Name:

Data Collected on:  
Zr.Chem.LSA.UMich.edu-inova400

Archive directory:

Sample directory:

FidFile: w-dms-nb3-98-1-1H

Pulse Sequence: PROTON (s2pul)

Solvent: cdcl3

Data collected on: Dec 4 2009

VARIAN

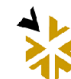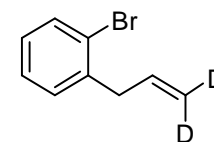

S3

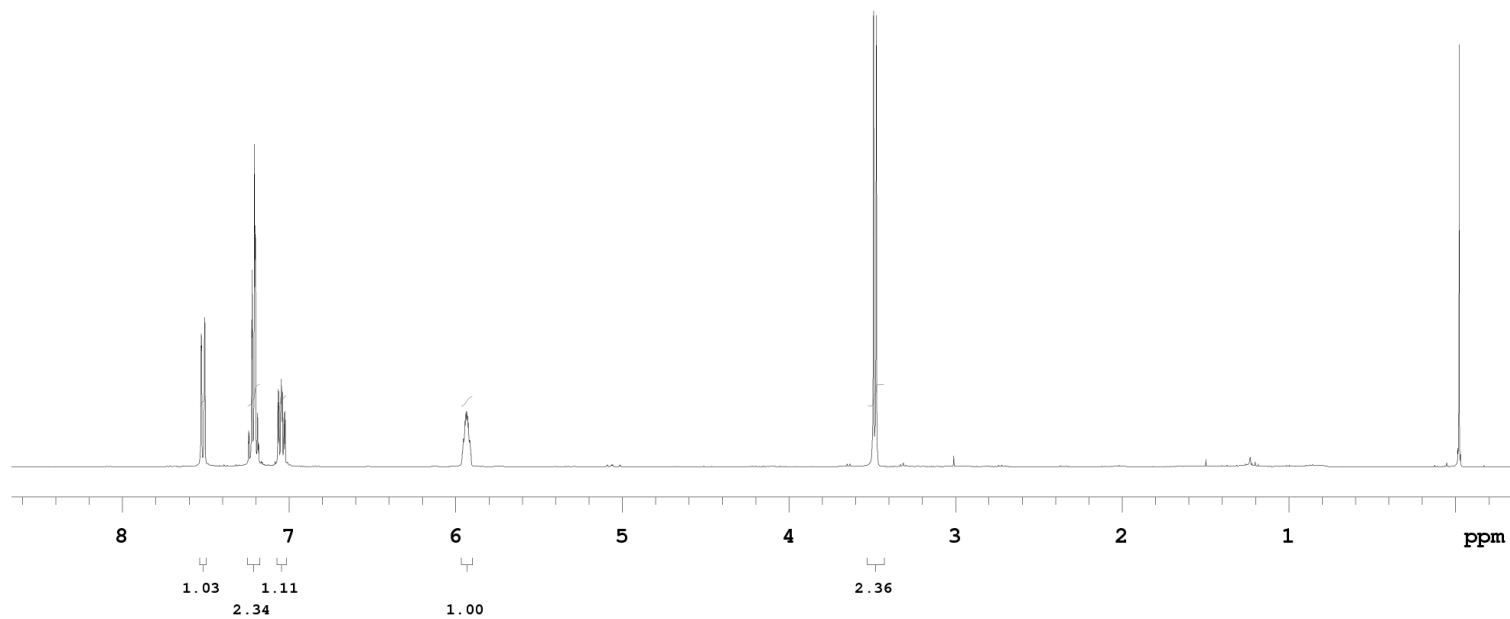

nb3-100-1

Sample Name:

Data Collected on:  
Zr.Chem.LSA.UMich.edu-inova400

Archive directory:

Sample directory:

FidFile: CARBON

Pulse Sequence: CARBON (s2pul)  
Solvent: cdcl3  
Data collected on: Dec 5 2009

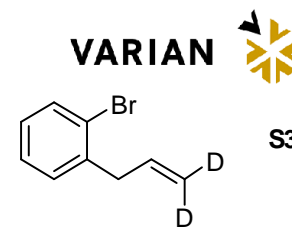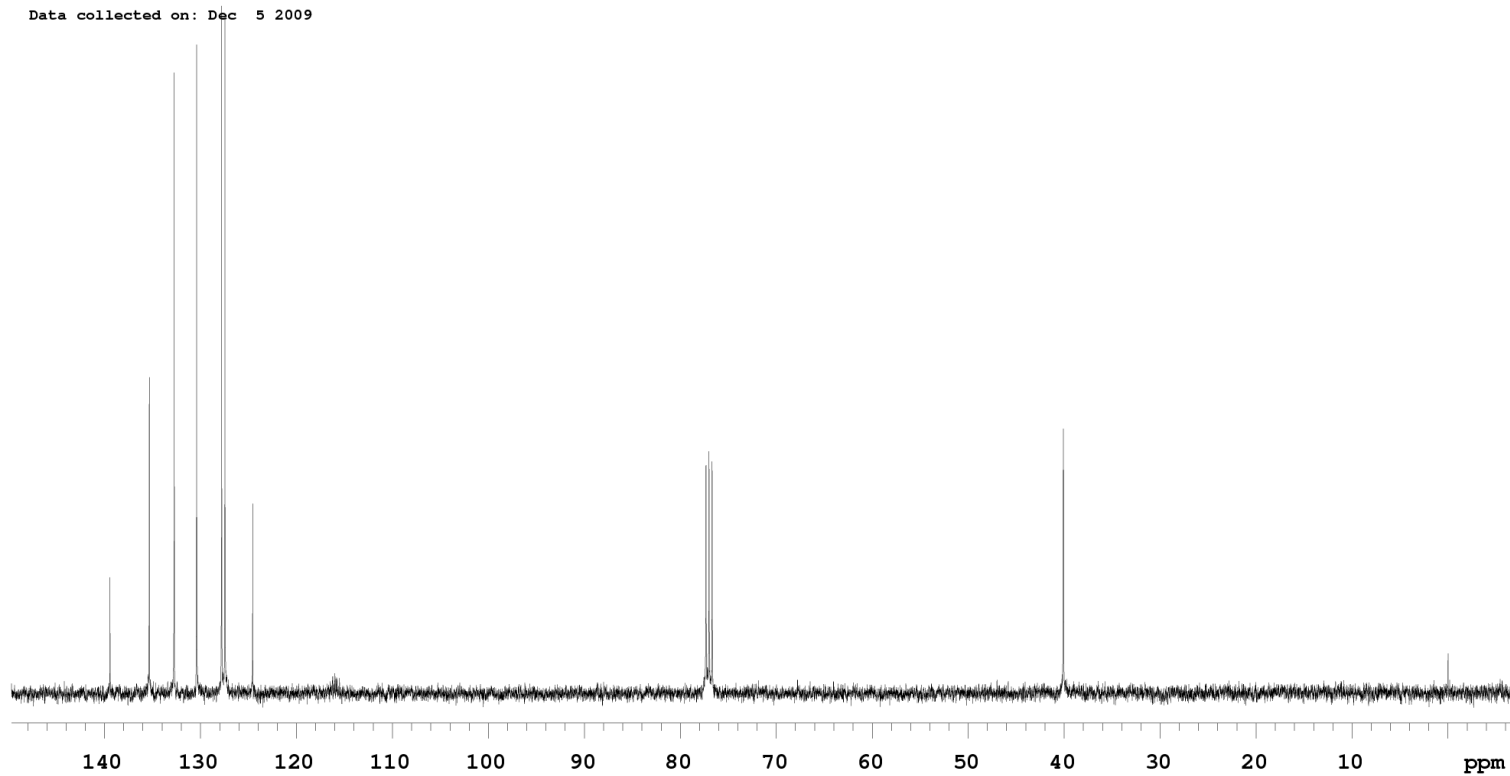

dms-nb2-5-1-1H

Sample Name:

Data Collected on:

Ga.Chem.LSA.UMich.Edu-vnmrs400

Archive directory:

Sample directory:

FidFile: w-dms-nb2-5-1-1H

Pulse Sequence: PROTON (s2pul)

Solvent: cdcl3

Data collected on: Nov 25 2008

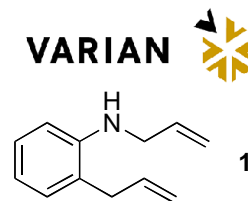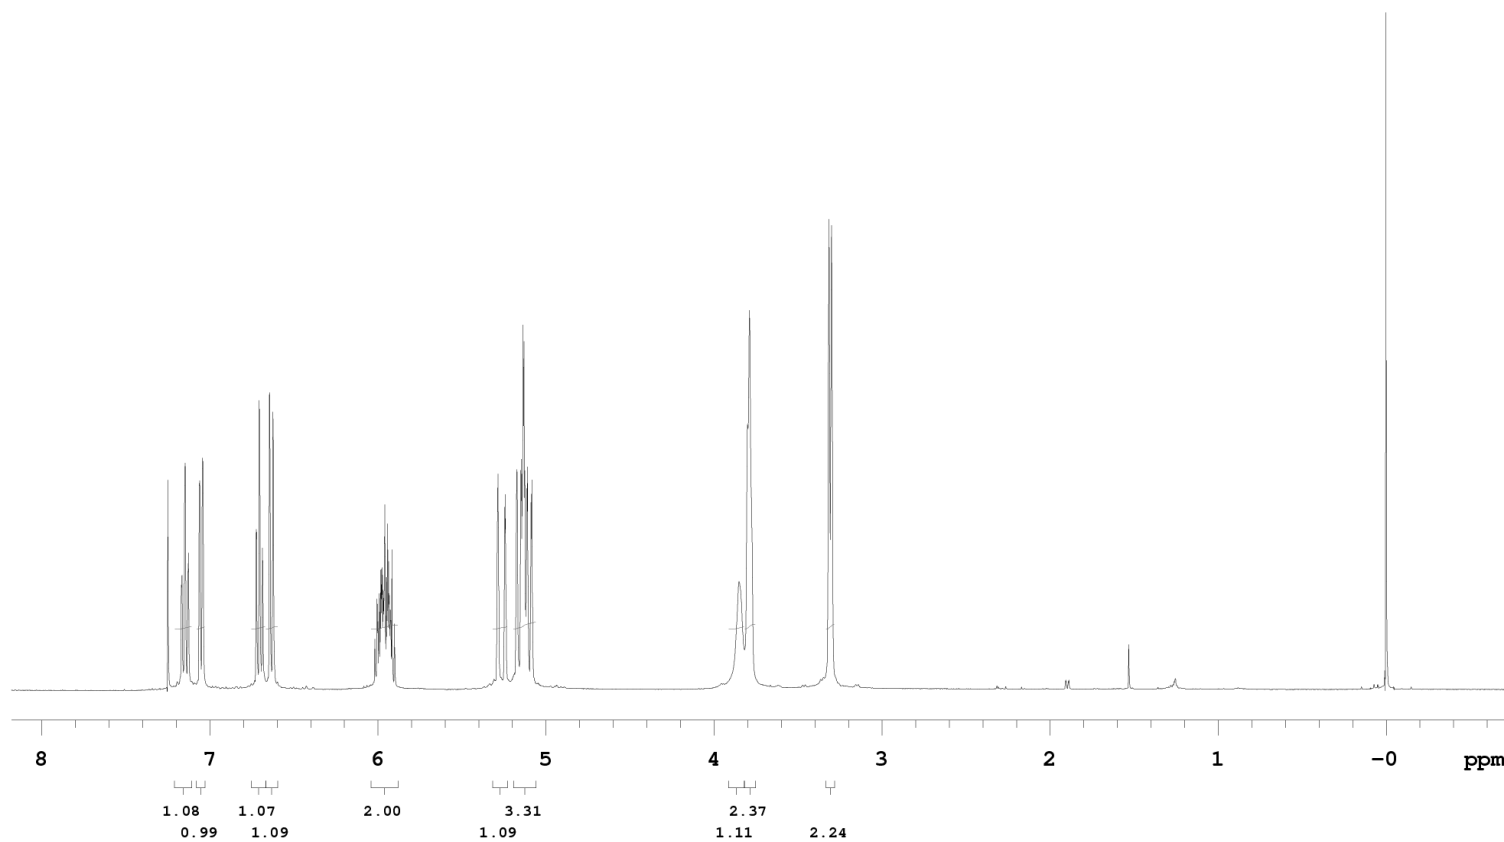



nb1-179-2-pure

Sample Name:

Data Collected on:

Ga.Chem.LSA.UMich.Edu-vnmrs400

Archive directory:

Sample directory:

FidFile: w-dms-nb1-179-2-pure-13C

Pulse Sequence: CARBON (s2pul)

Solvent: cdcl3

Data collected on: Oct 17 2008

VARIAN 

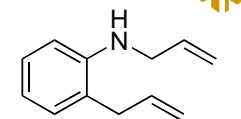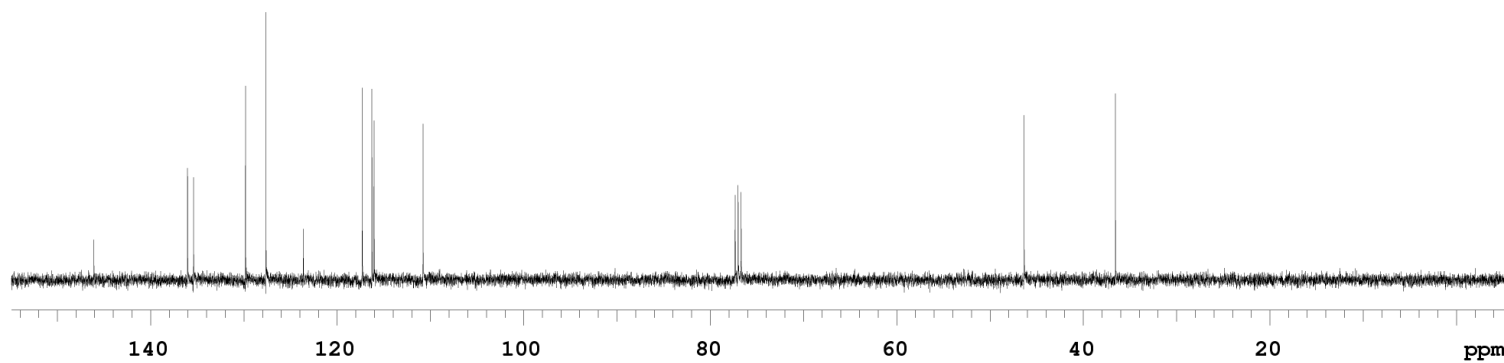

nb2-130-2-pure

Sample Name:

Data Collected on:

Zr.Chem.LSA.UMich.edu-inova400

Archive directory:

Sample directory:

FidFile: w-dms-nb2-130-2-pure

Pulse Sequence: PROTON (s2pul)

Solvent: cdcl3

Data collected on: May 13 2009

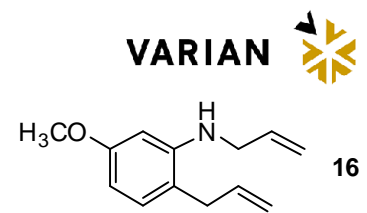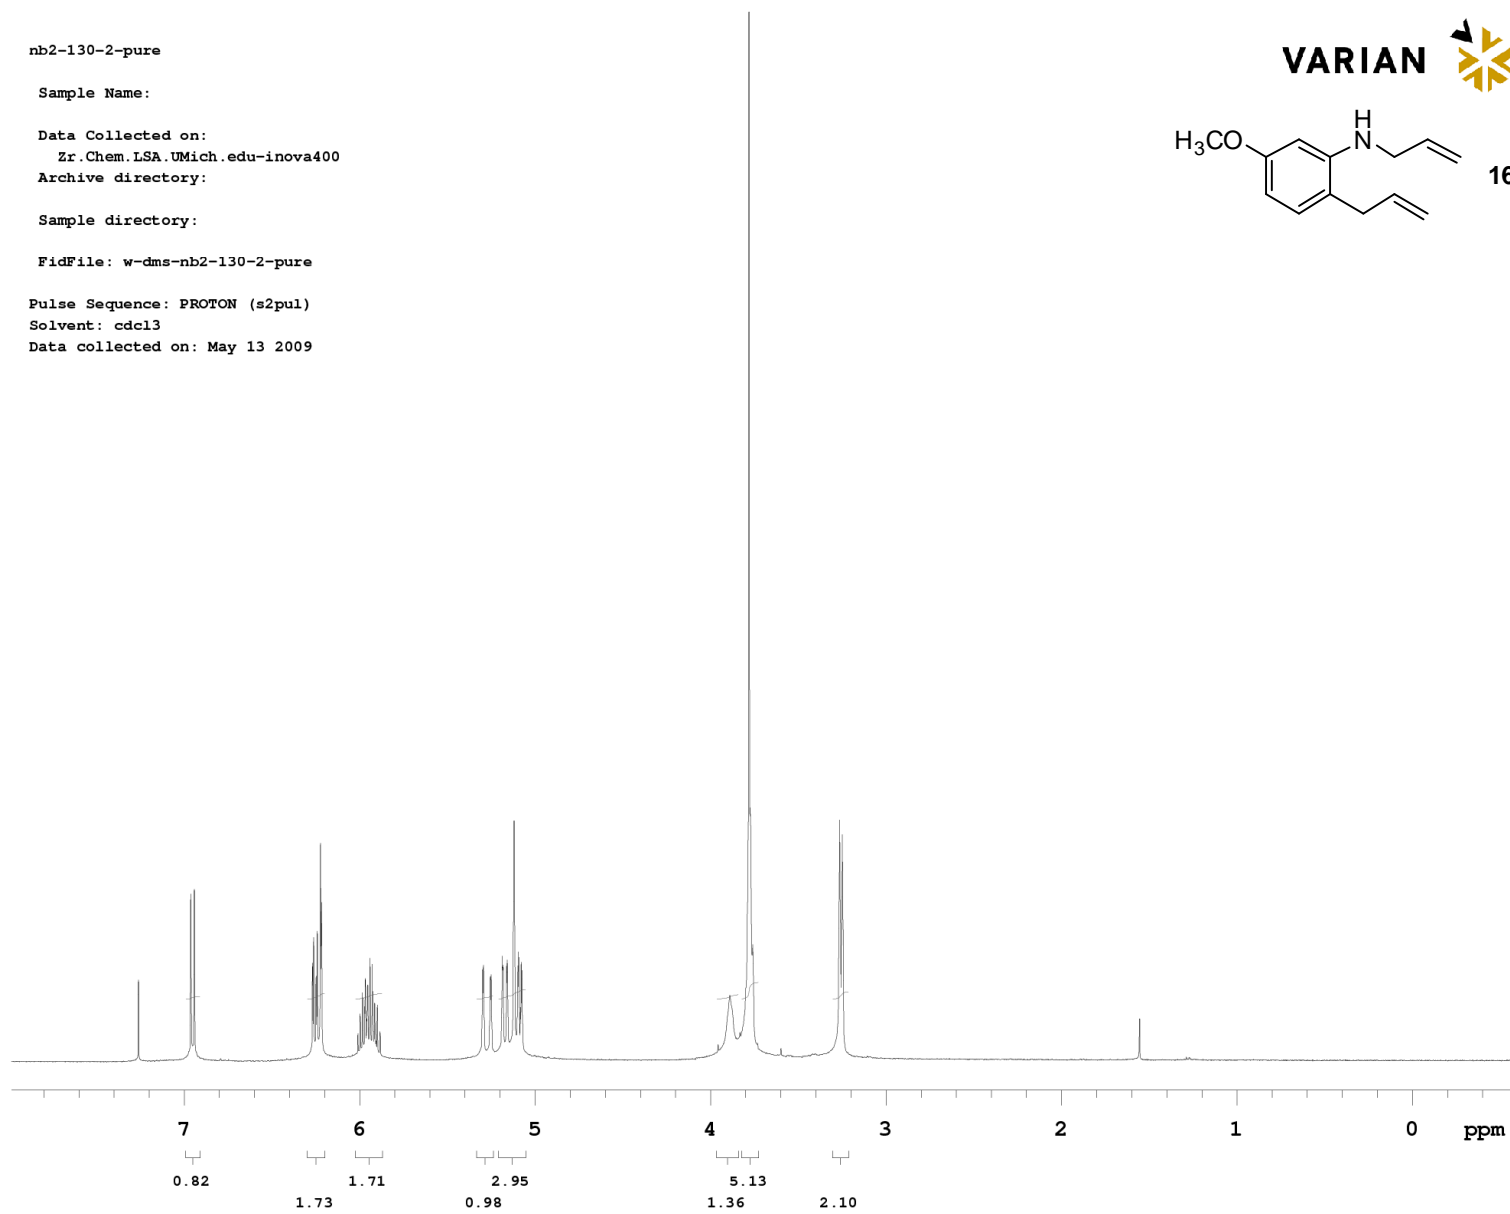

nb2-130-2-pure

Sample Name:

Data Collected on:  
Zr.Chem.LSA.UMich.edu-inova400  
Archive directory:

Sample directory:

FidFile: w-dms-nb2-130-2-13C

Pulse Sequence: CARBON (s2pul)  
Solvent: cdcl3  
Data collected on: May 13 2009

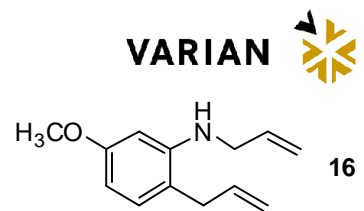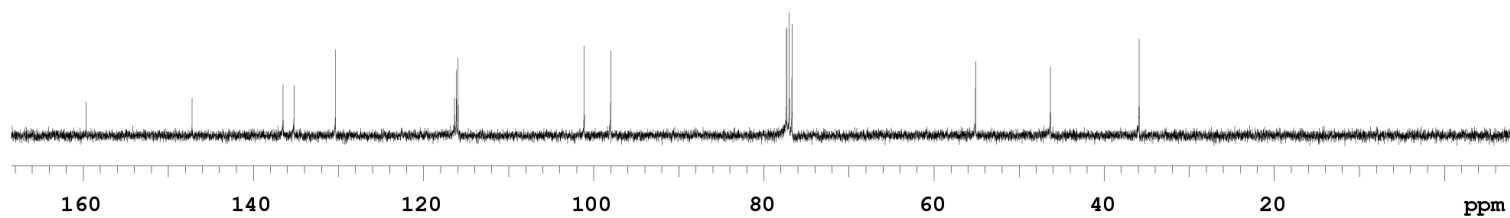

nb3-19-1

Sample Name:

Data Collected on:

Zn.Chem.LSA.UMich.edu-mercury300

Archive directory:

Sample directory:

FidFile: w-dms-nb3-19-1-1H

Pulse Sequence: PROTON (s2pul)

Solvent: CDCl3

Data collected on: Sep 22 2009

VARIAN 

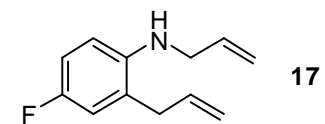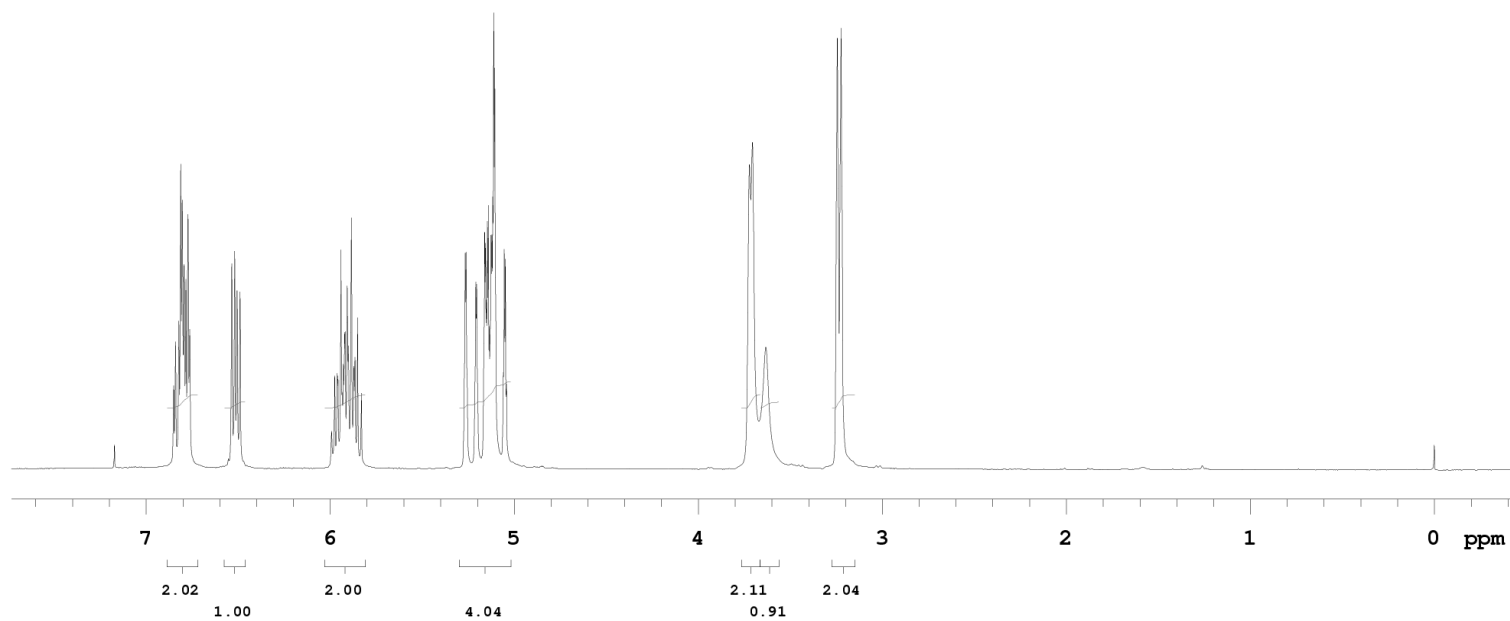

nb3-19-1-pure

Sample Name:

Data Collected on:

Zr.Chem.LSA.UMich.edu-inova400

Archive directory:

/export/home/chempack/vnmrsys/data

Sample directory:

FidFile: w-dms-nb3-19-1-13C

Pulse Sequence: CARBON (s2pul)

Solvent: cdcl3

Data collected on: Sep 17 2009

VARIAN 

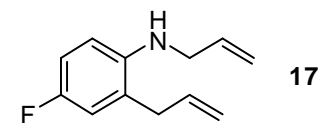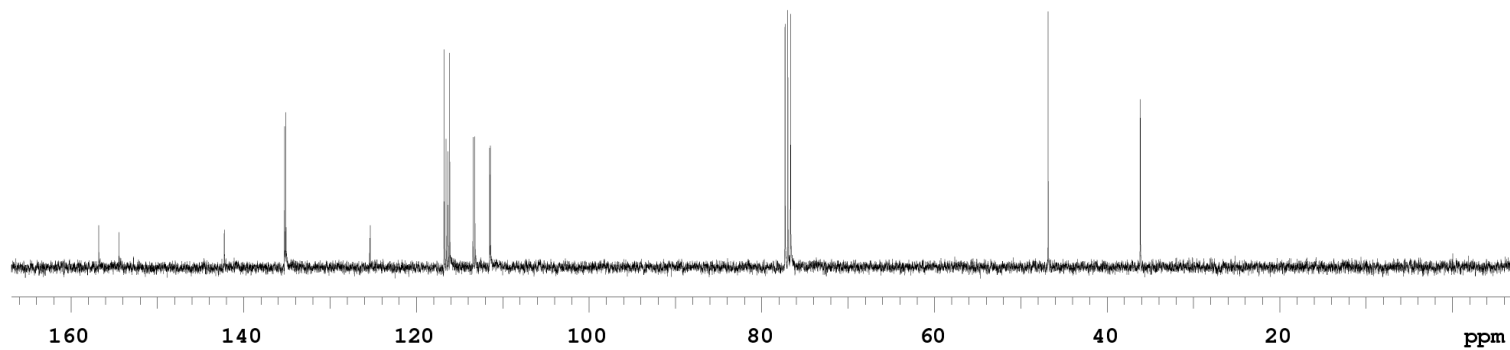

nb3-20-2

Sample Name:

Data Collected on:

Zr.Chem.LSA.UMich.edu-inova400

Archive directory:

/export/home/chempack/vnmrsys/data

Sample directory:

FidFile: w-dms-nb3-20-2-1H

Pulse Sequence: PROTON (s2pul)

Solvent: cdcl3

Data collected on: Sep 19 2009

VARIAN 

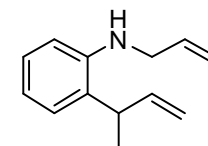

18

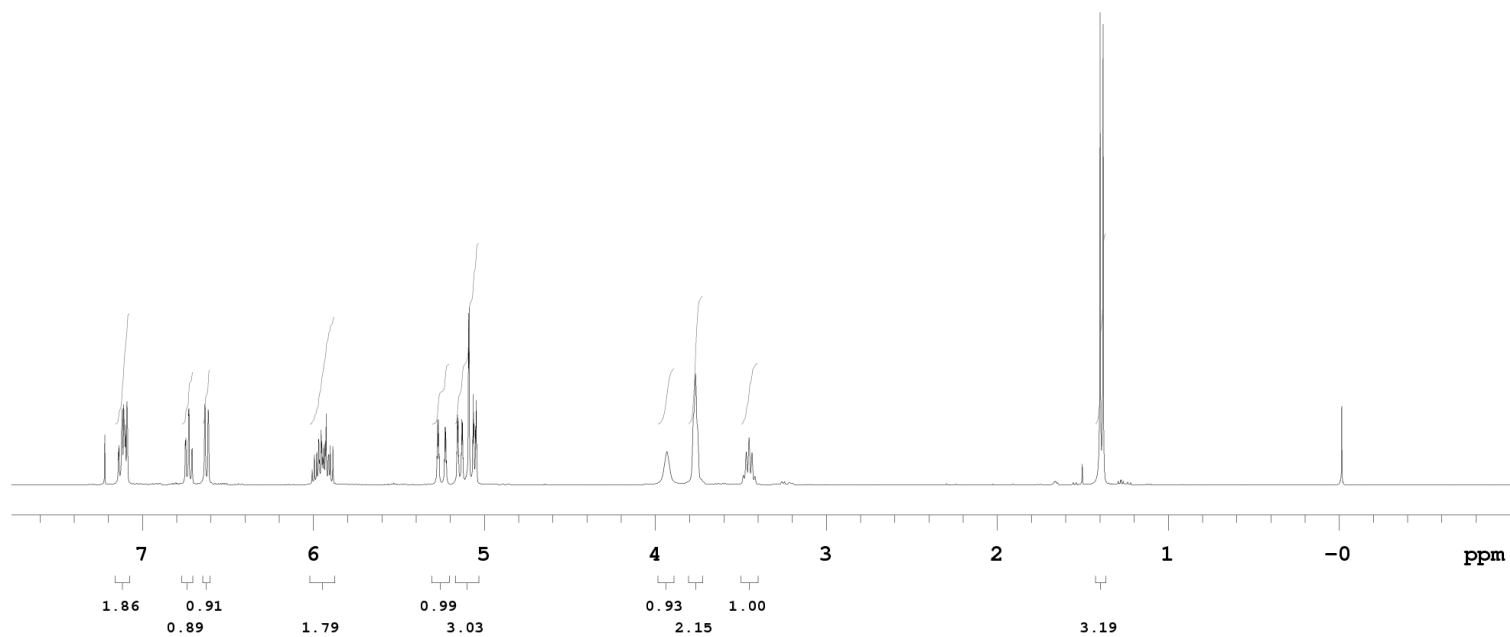

nb3-20-2

Sample Name:

Data Collected on:

Zr.Chem.LSA.UMich.edu-inova400

Archive directory:

/export/home/chempack/vnmrsys/data

Sample directory:

FidFile: w-dms-nb3-20-2-13C

Pulse Sequence: CARBON (s2pul)

Solvent: cdcl3

Data collected on: Sep 19 2009

VARIAN 

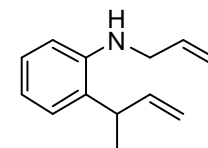

18

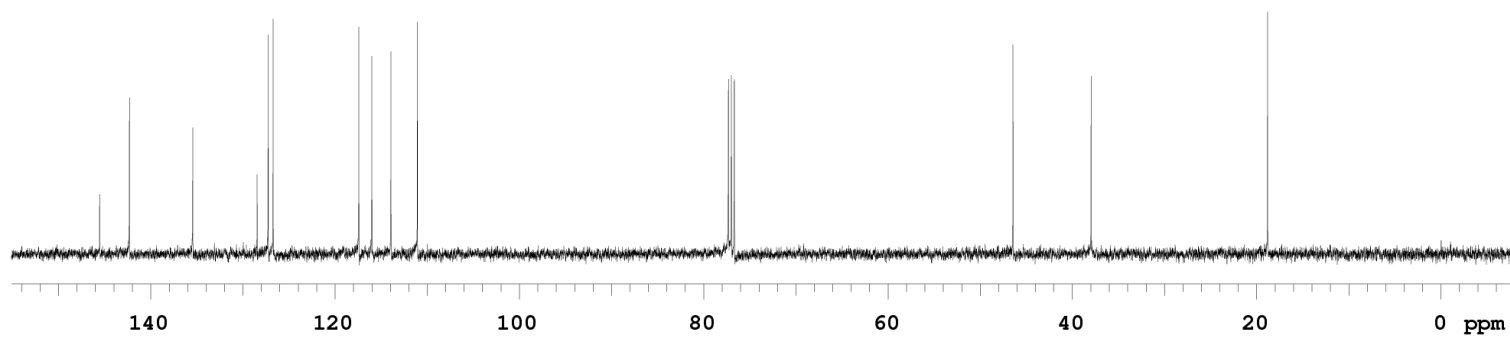

nb2-61-1-pure

Sample Name:

Data Collected on:

Ga.Chem.LSA.UMich.Edu-vnmrs400

Archive directory:

Sample directory:

FidFile: w-dms-nb2-61-1-pure

Pulse Sequence: PROTON (s2pul)

Solvent: cdcl3

Data collected on: Jan 29 2009

VARIAN 

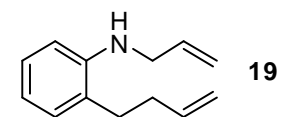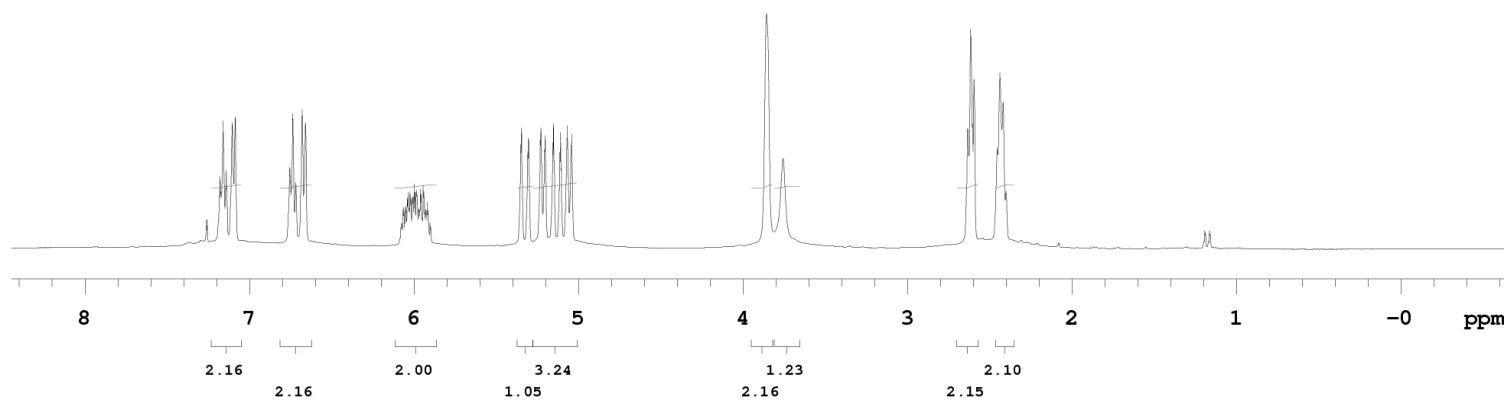



nb2-61-1-pure

Sample Name:

Data Collected on:

Ga.Chem.LSA.UMich.Edu-vnmrs400

Archive directory:

Sample directory:

FidFile: w-dms-nb2-61-1-13C

Pulse Sequence: CARBON (s2pul)

Solvent: cdcl3

Data collected on: Jan 29 2009

VARIAN 

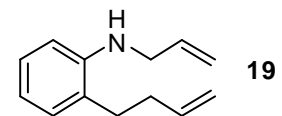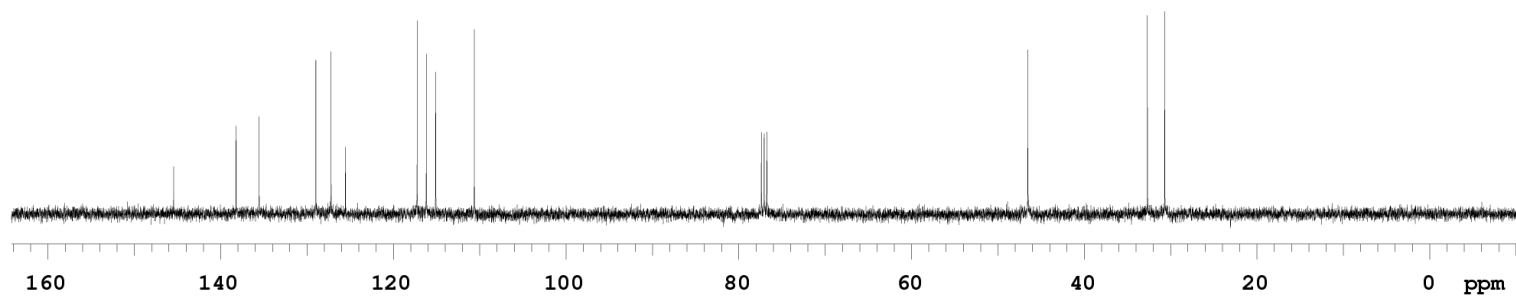

nb3-14-1

Sample Name:

Data Collected on:

Zr.Chem.LSA.UMich.edu-inova400

Archive directory:

/export/home/chempack/vnmrsys/data

Sample directory:

FidFile: w-dms-nb3-14-1-pure

Pulse Sequence: PROTON (s2pul)

Solvent: cdcl3

Data collected on: Sep 23 2009

VARIAN 

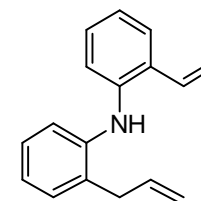

30

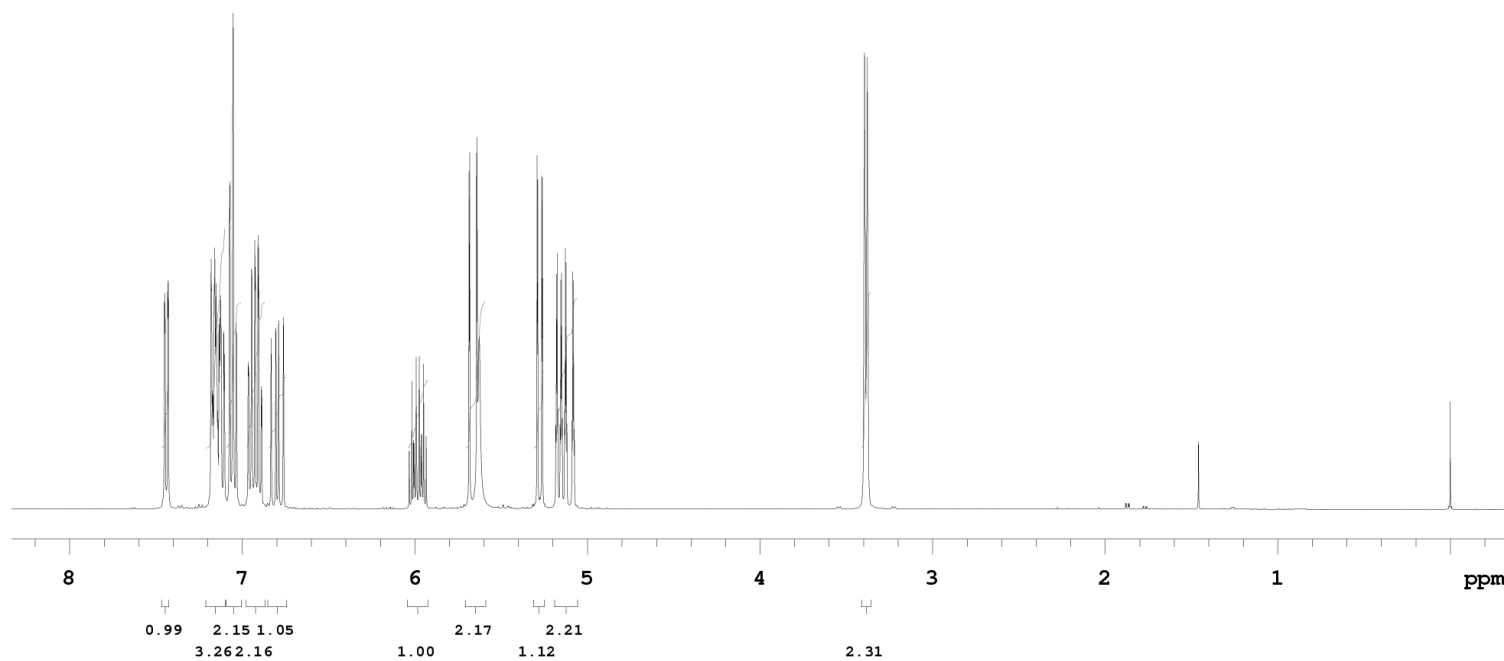

NB2-67-1-pure

Sample Name:

Data Collected on:

Co.Chem.LSA.UMich.Edu-vnmrs400

Archive directory:

Sample directory:

FidFile: w-dms-nb2-67-1-13C

Pulse Sequence: CARBON (s2pul)

Solvent: cdcl3

Data collected on: Feb 3 2009

VARIAN 

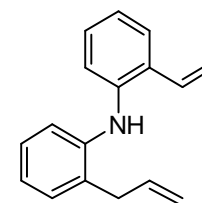

30

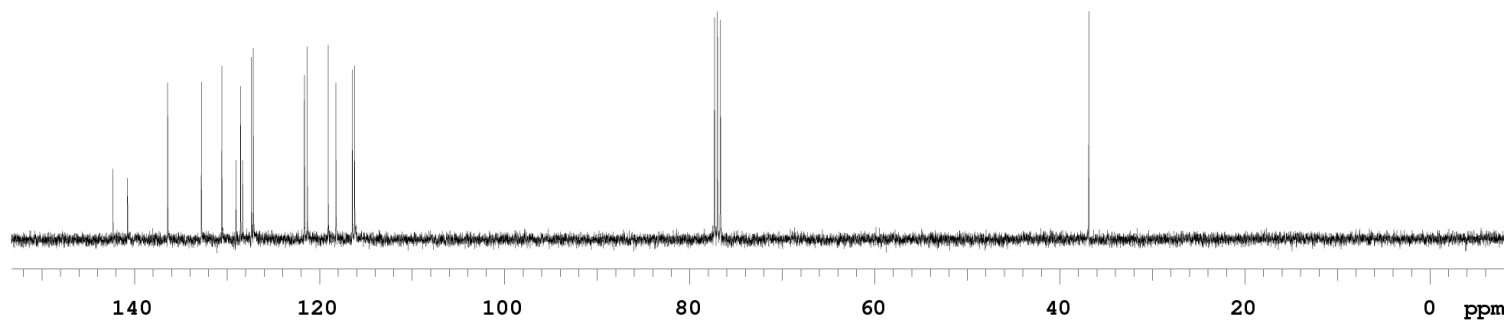

nb3-37-1-pure

Sample Name:

Data Collected on:

Ga.Chem.LSA.UMich.edu-vnmrs400

Archive directory:

Sample directory:

FidFile: PROTON

Pulse Sequence: PROTON (s2pul)

Solvent: cdcl3

Data collected on: Oct 13 2009

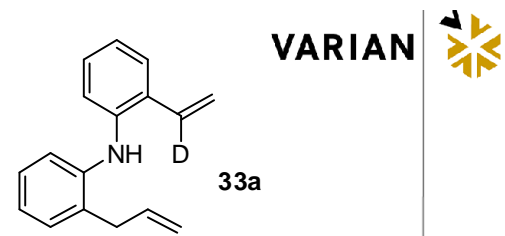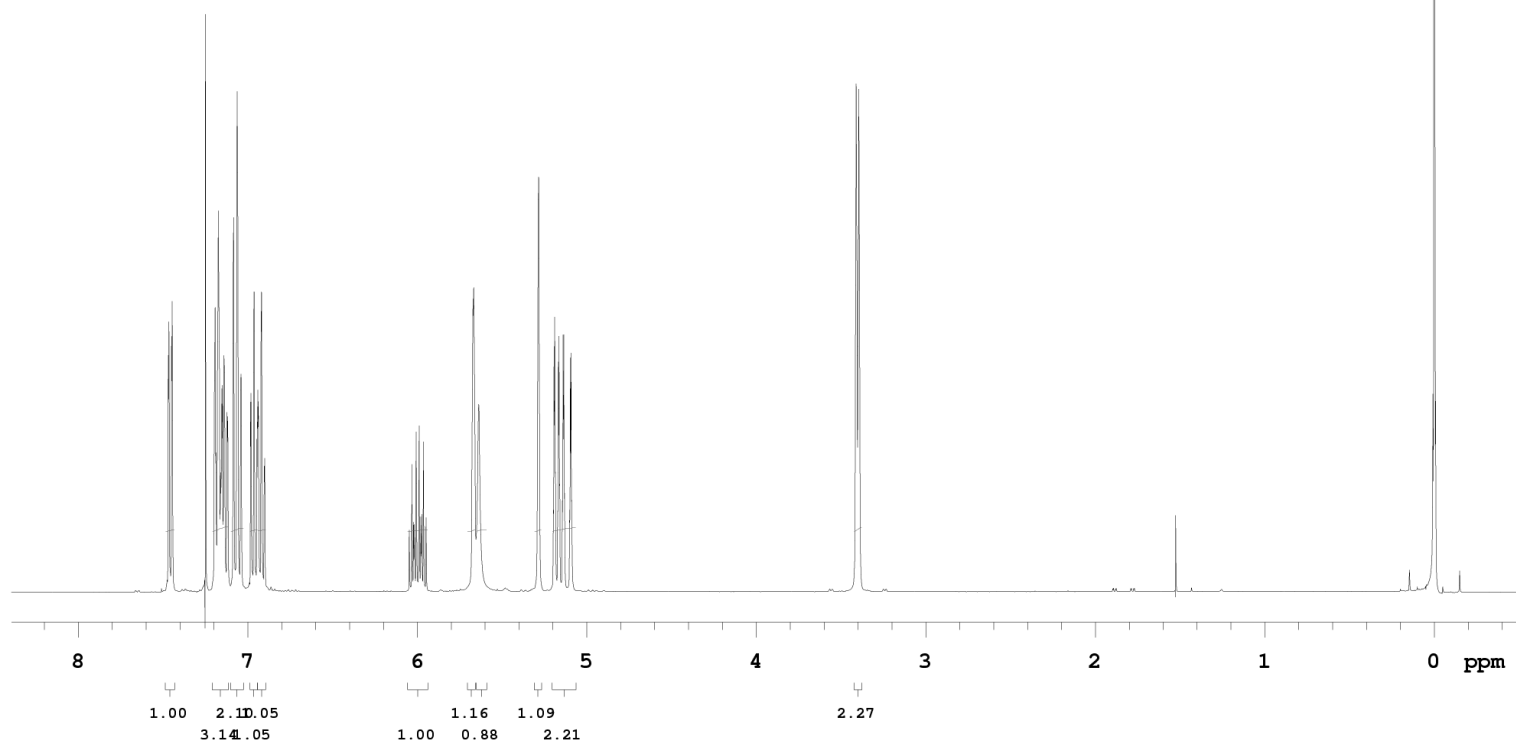

nb3-37-1

Sample Name:

Data Collected on:  
Co.Chem.LSA.UMich.edu-vnmrs400  
Archive directory:

Sample directory:

FidFile: CARBON

Pulse Sequence: CARBON (s2pul)  
Solvent: cdcl3  
Data collected on: Oct 13 2009

VARIAN 

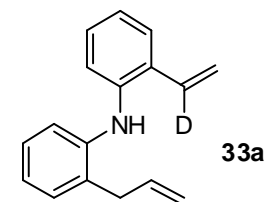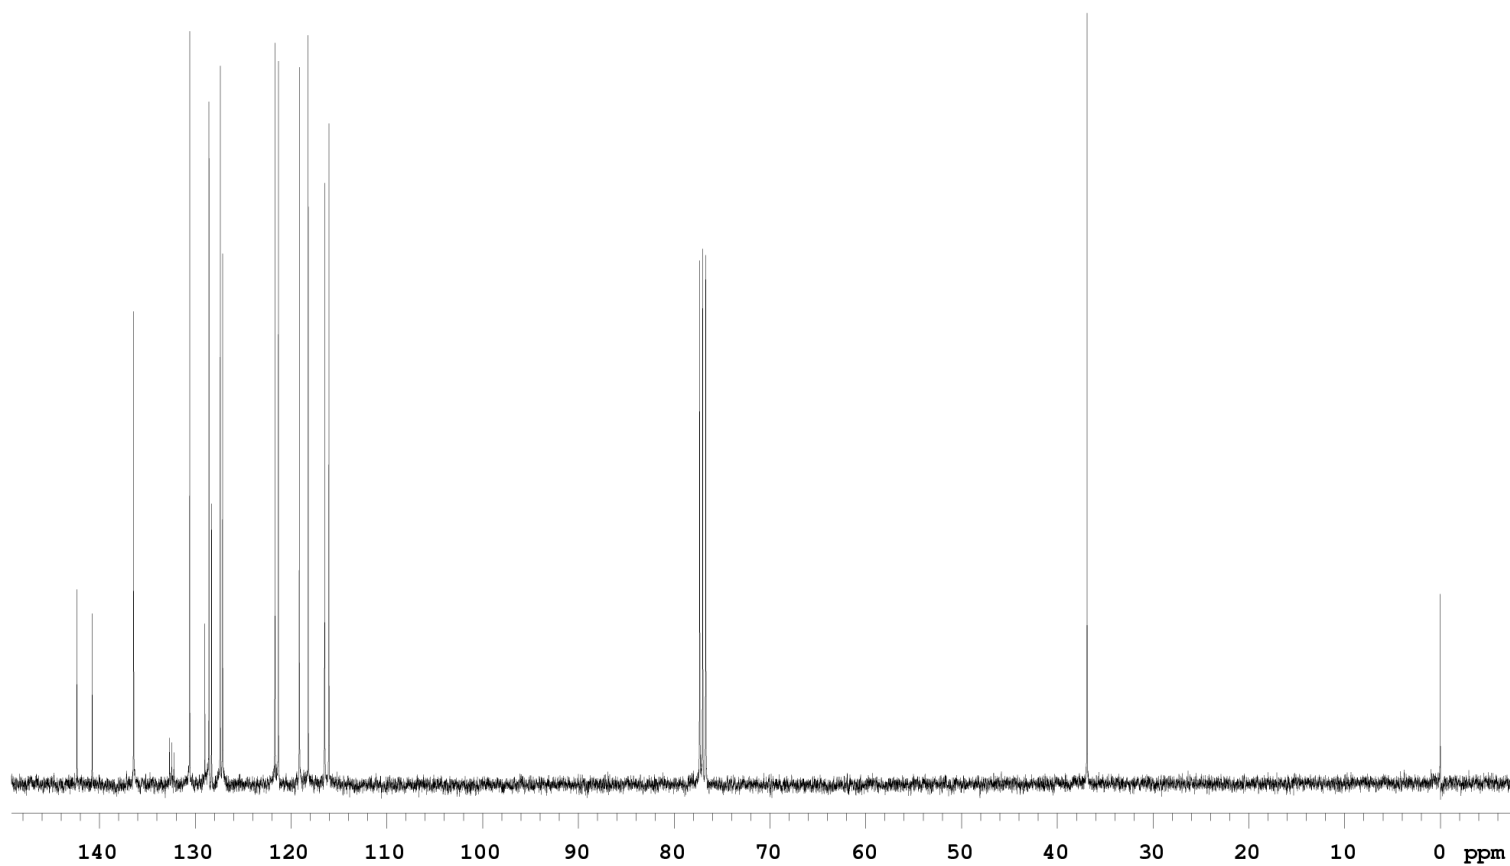

nb3-41-2

Sample Name:

Data Collected on:

Zr.Chem.LSA.UMich.edu-inova400

Archive directory:

/export/home/chempack/vnmrsys/data

Sample directory:

FidFile: w-dms-nb3-41-2-1H

Pulse Sequence: PROTON (s2pul)

Solvent: cdcl3

Data collected on: Oct 17 2009

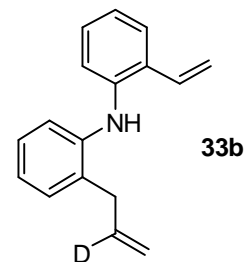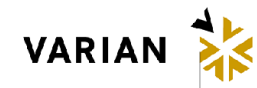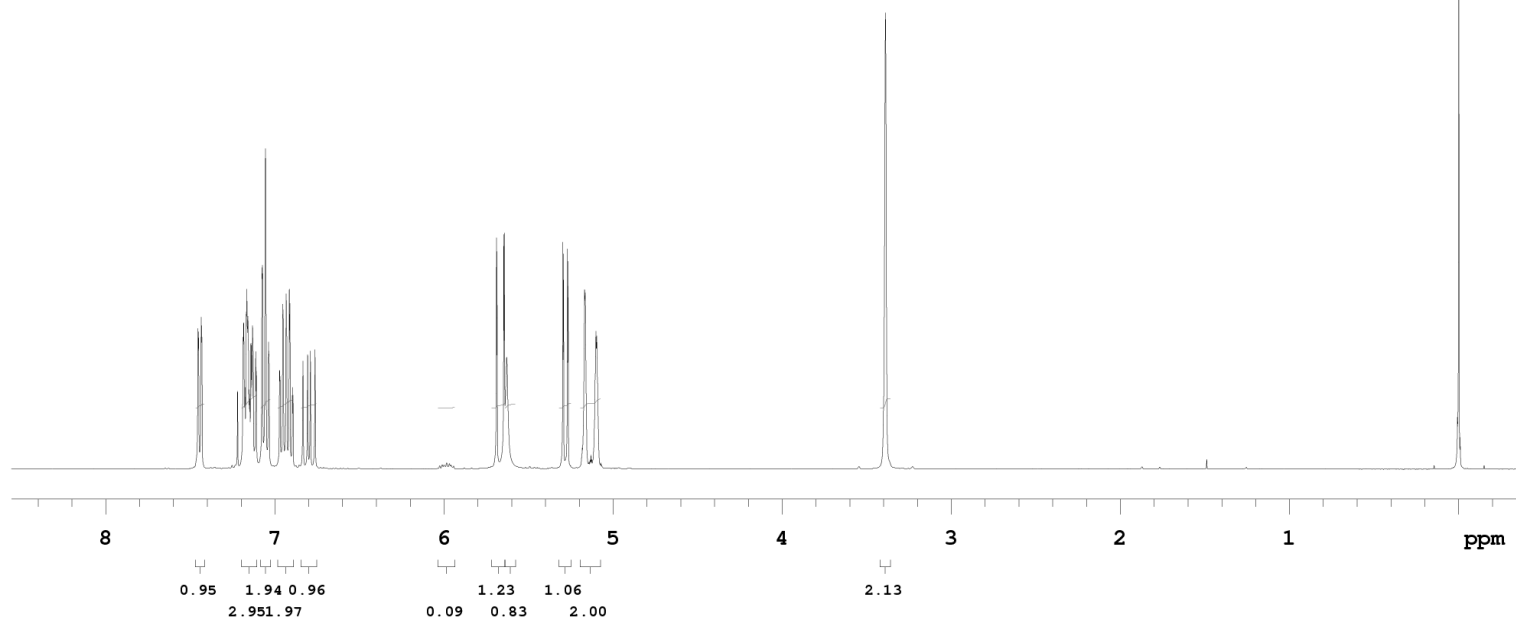

nb3-41-2

Sample Name:

Data Collected on:

Zr.Chem.LSA.UMich.edu-inova400

Archive directory:

/export/home/chempack/vnmrsys/data

Sample directory:

FidFile: CARBON

Pulse Sequence: CARBON (s2pul)

Solvent: cdcl3

Data collected on: Oct 17 2009

VARIAN 

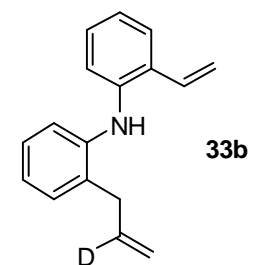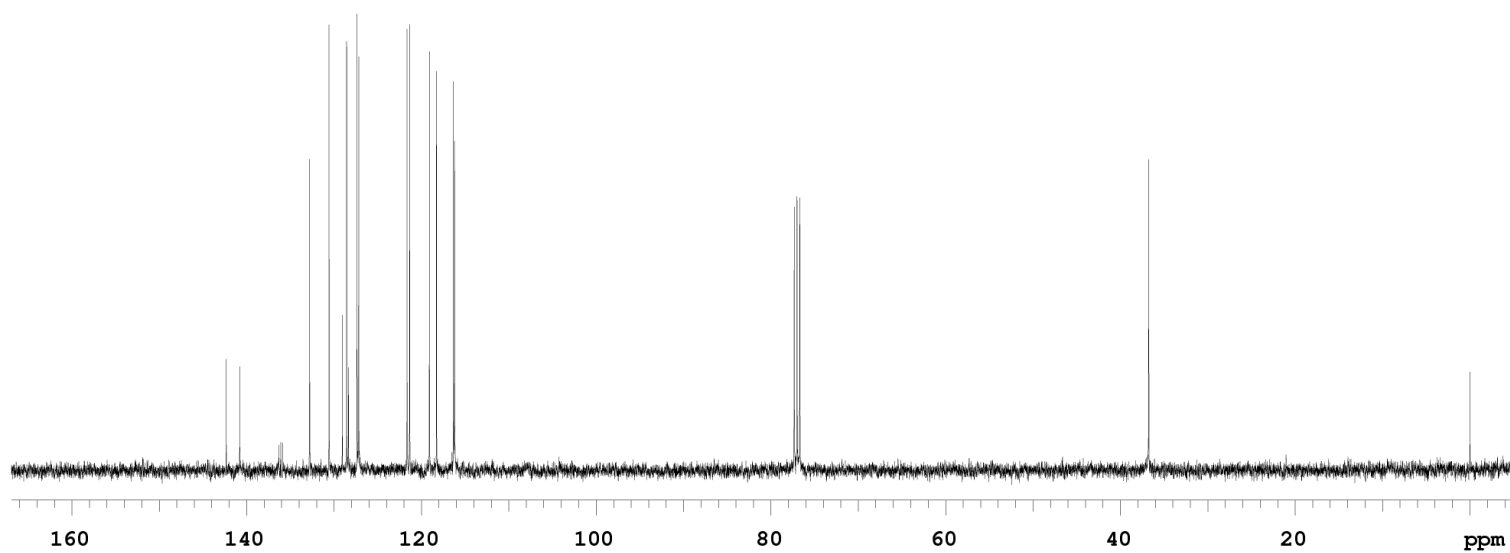

nb3-102

Sample Name:

Data Collected on:  
Sn.Chem.LSA.UMich.edu-inova500  
Archive directory:

Sample directory:

FidFile: w-dms-nb3-102-1-1H

Pulse Sequence: PROTON (s2pul)  
Solvent: cdcl3  
Data collected on: Dec 7 2009

VARIAN 

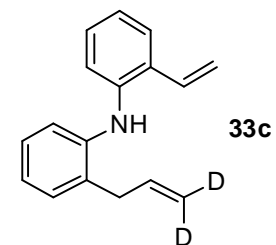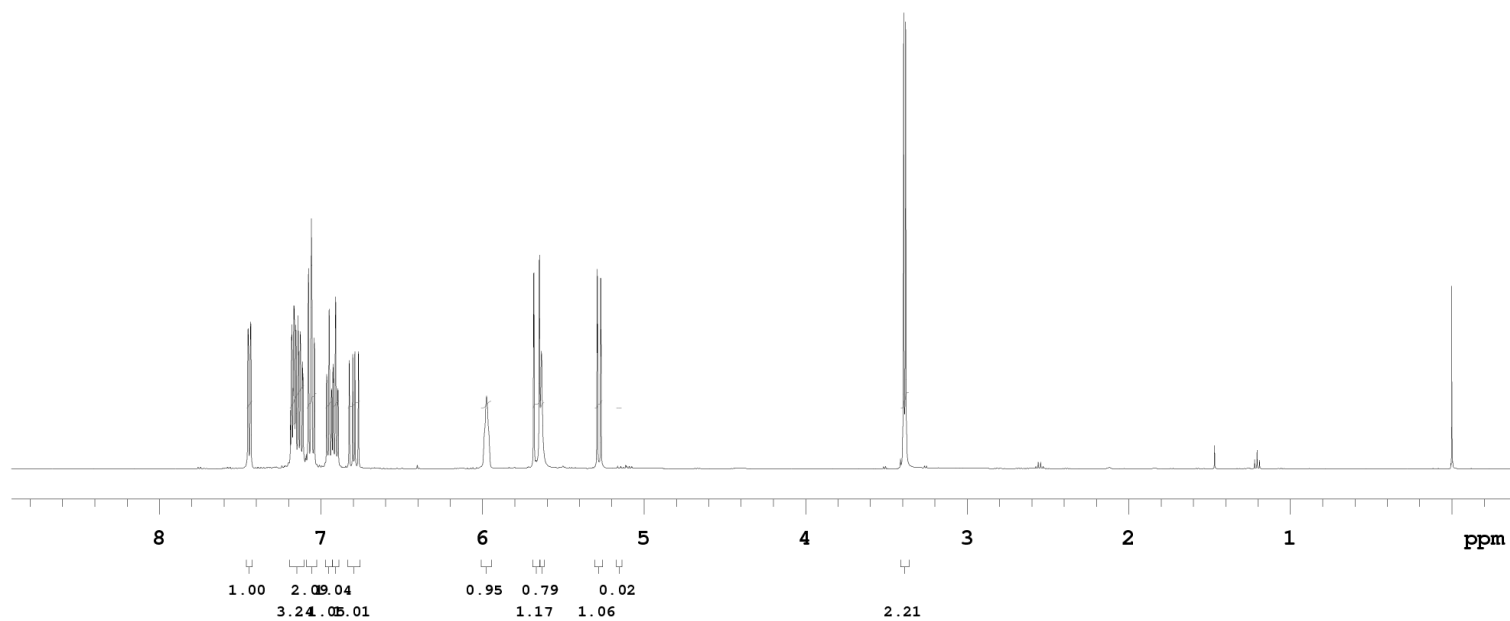



nb3-102-1

Sample Name:

Data Collected on:

Ga.Chem.LSA.UMich.edu-vnmrs400

Archive directory:

Sample directory:

FidFile: w-dms-nb3-102-1-13C

Pulse Sequence: CARBON (s2pul)

Solvent: cdcl3

Data collected on: Dec 7 2009

VARIAN 

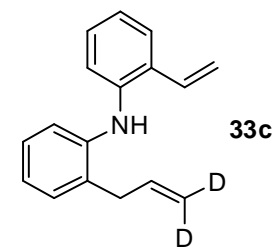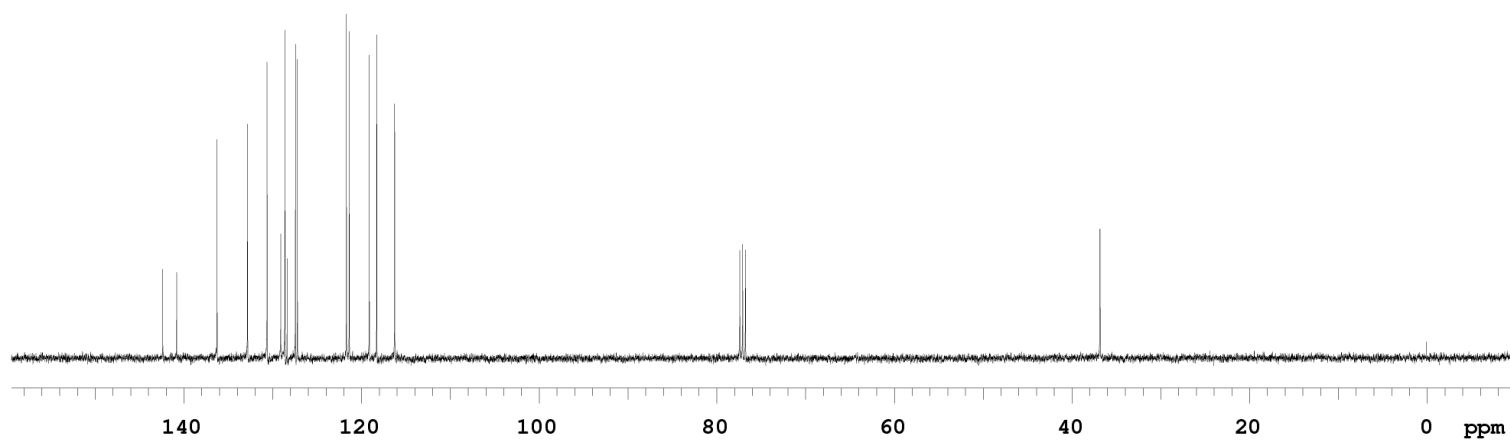

nb2-101-1-monocyclized

Sample Name:

Data Collected on:  
Zr.Chem.LSA.UMich.edu-inova400  
Archive directory:

Sample directory:

FidFile: w-dms-nb2-101-1-monocyclized

Pulse Sequence: PROTON (s2pul)  
Solvent: cdcl3  
Data collected on: Mar 13 2009

VARIAN 

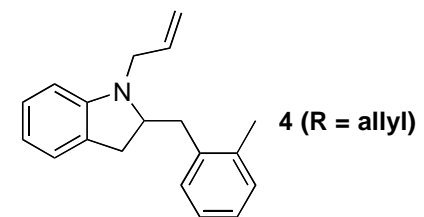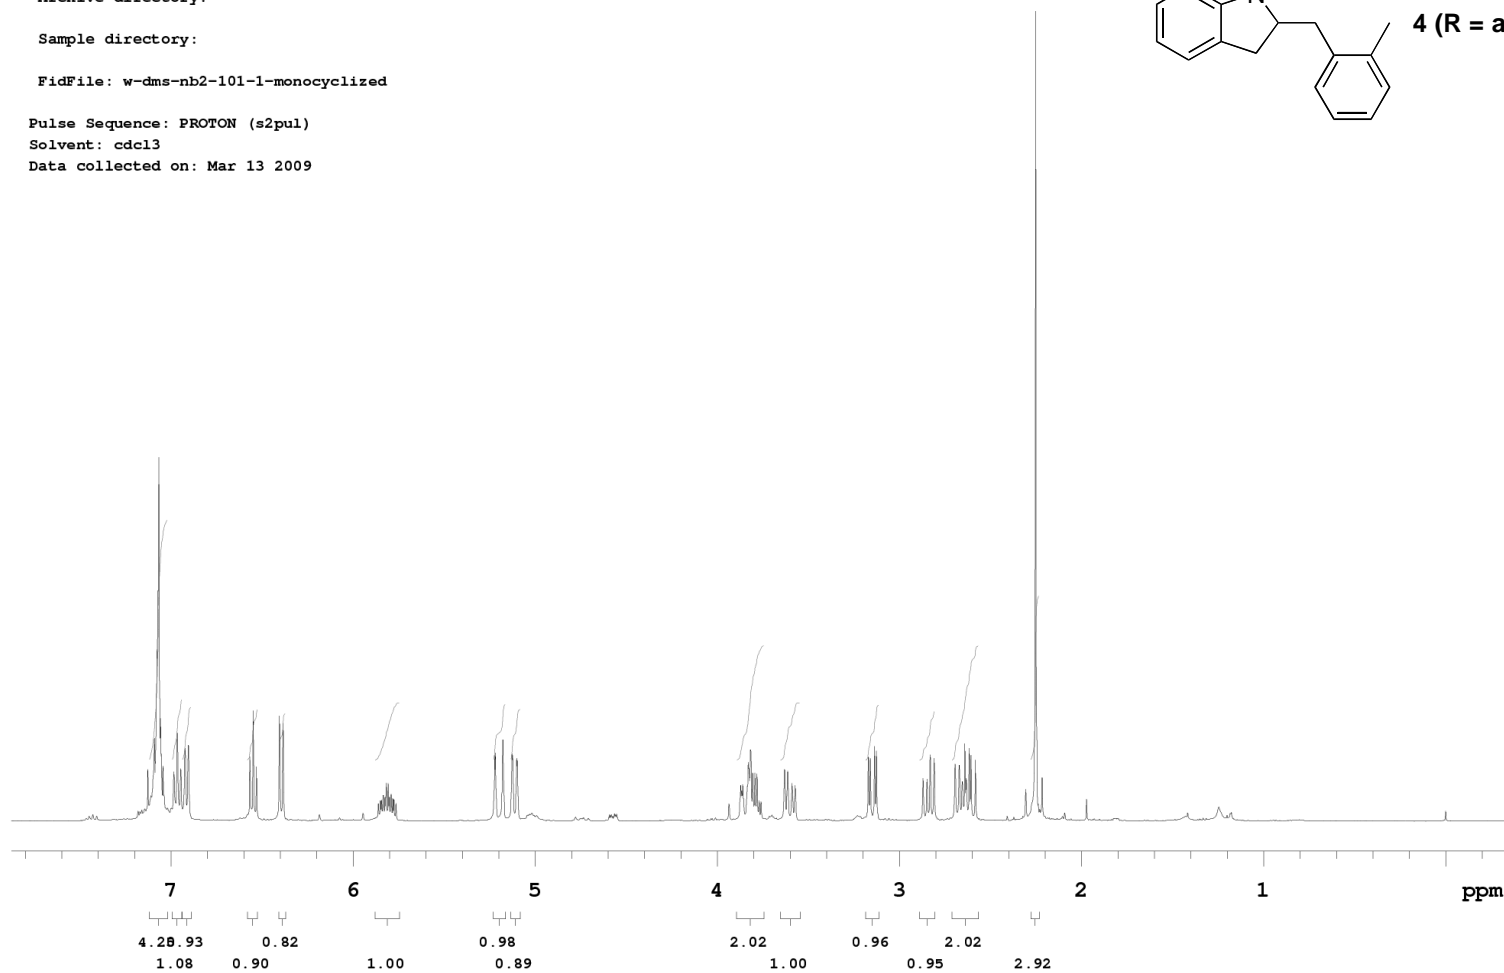

nb2-101-1-monocyclized

Sample Name:

Data Collected on:  
Zr.Chem.LSA.UMich.edu-inova400  
Archive directory:

Sample directory:

FidFile: w-dms-nb2-101-1-13Cmonocyclized

Pulse Sequence: CARBON (s2pul)  
Solvent: cdcl3  
Data collected on: Mar 13 2009

VARIAN 

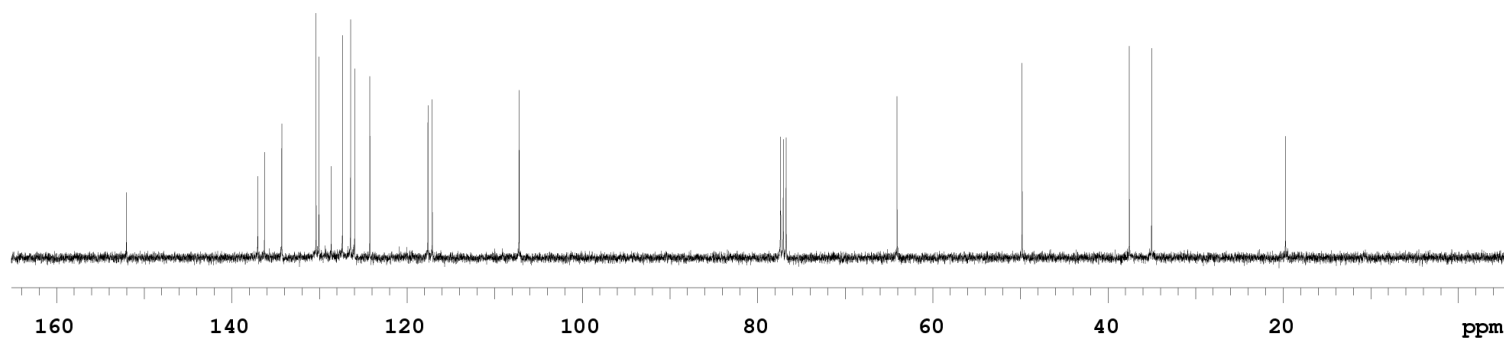

nb2-192-2-pure

Sample Name:

Data Collected on:  
Zr.Chem.LSA.UMich.edu-inova400

Archive directory:

Sample directory:

FidFile: w-dms-nb2-192-2-1H

Pulse Sequence: PROTON (s2pul)  
Solvent: cdcl3  
Data collected on: Aug 20 2009

VARIAN 

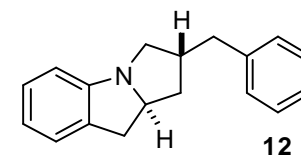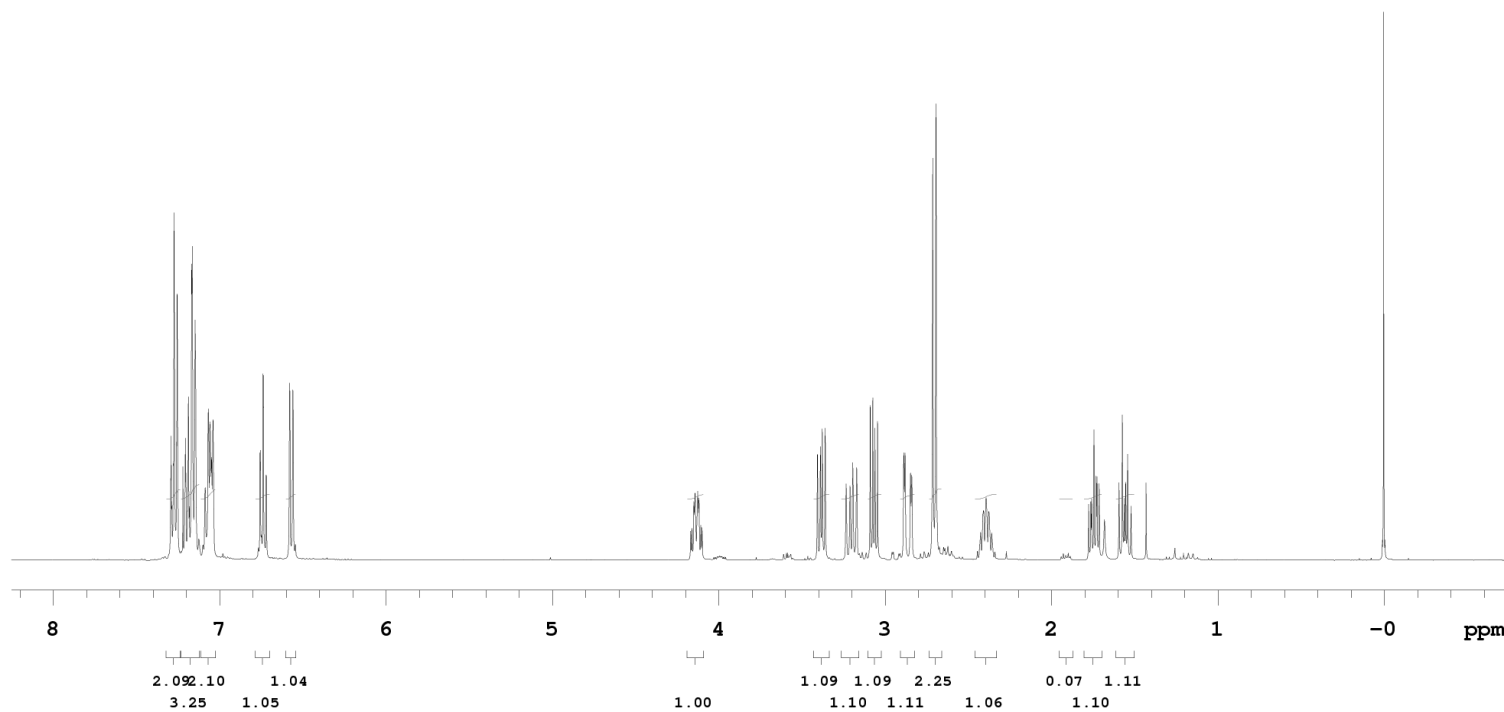

nb2-192-2-pure

Sample Name:

Data Collected on:

Zr.Chem.LSA.UMich.edu-inova400

Archive directory:

Sample directory:

FidFile: w-dms-nb2-192-2-13C

Pulse Sequence: CARBON (s2pul)

Solvent: cdcl3

Data collected on: Aug 20 2009

VARIAN 

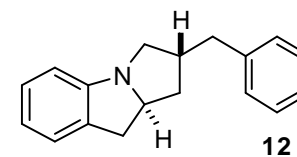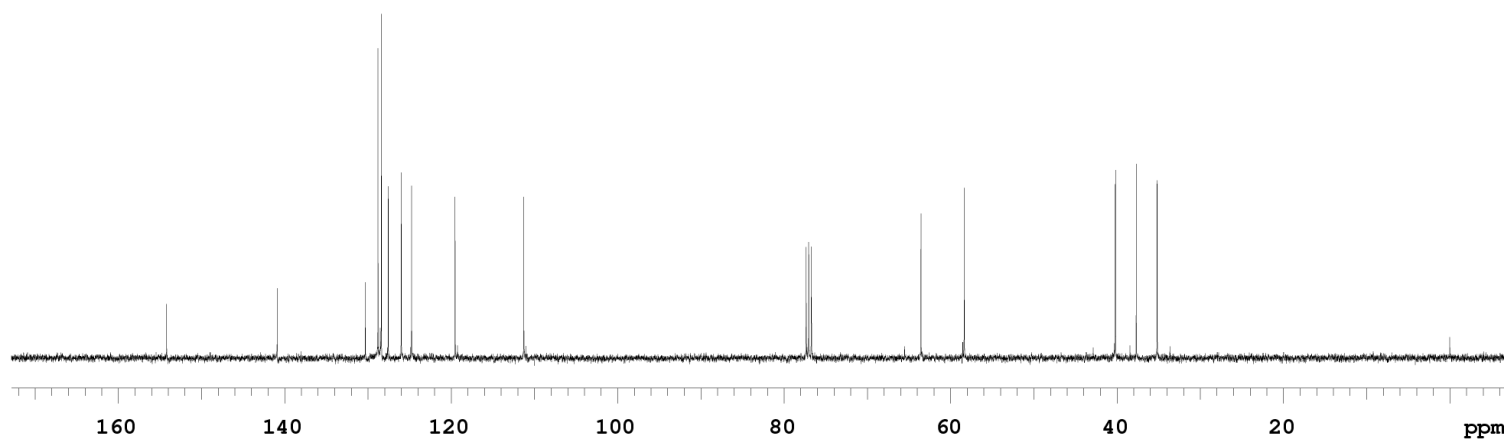

nb3-18-1

Sample Name:

Data Collected on:

Zr.Chem.LSA.UMich.edu-inova400

Archive directory:

/export/home/chempack/vnmrsys/data

Sample directory:

FidFile: w-dms-nb3-18-1-pure

Pulse Sequence: PROTON (s2pul)

Solvent: cdcl3

Data collected on: Sep 18 2009

VARIAN 

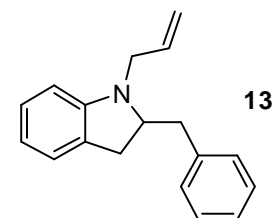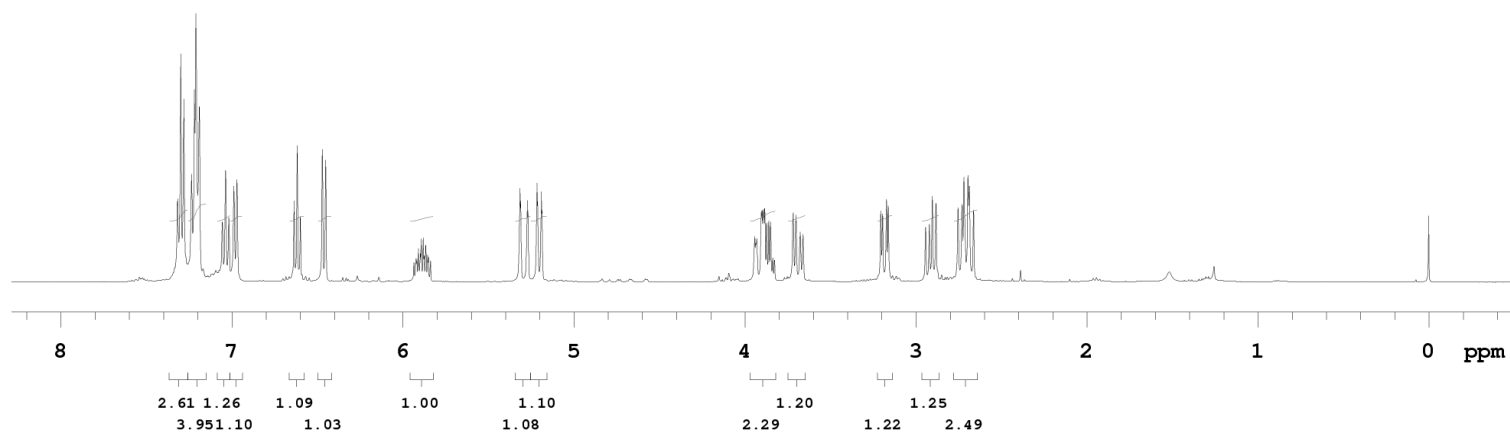

nb3-18-1

Sample Name:

Data Collected on:

Zr.Chem.LSA.UMich.edu-inova400

Archive directory:

/export/home/chempack/vnmrsys/data

Sample directory:

FidFile: w-dms-nb3-18-2-13C

Pulse Sequence: CARBON (s2pul)

Solvent: cdcl3

Data collected on: Sep 18 2009

VARIAN 

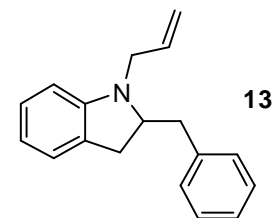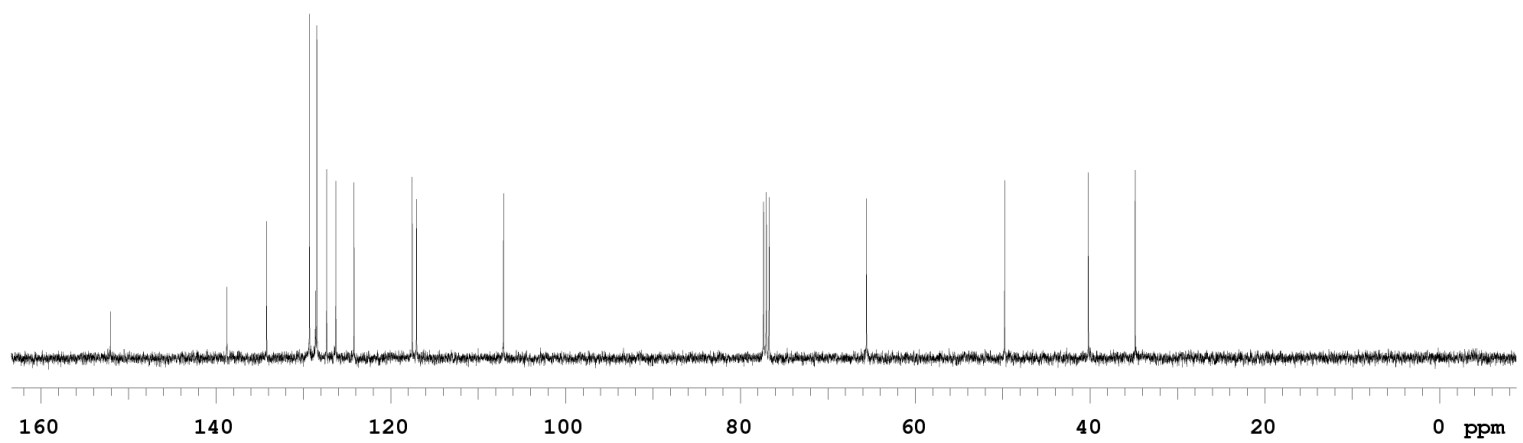

nb1-200-2

Sample Name:

Data Collected on:  
Co.Chem.LSA.UMich.edu-vnmrs400  
Archive directory:

Sample directory:

FidFile: w-dms-nb1-200-2-1H

Pulse Sequence: PROTON (s2pul)  
Solvent: cdcl3  
Data collected on: Sep 25 2009

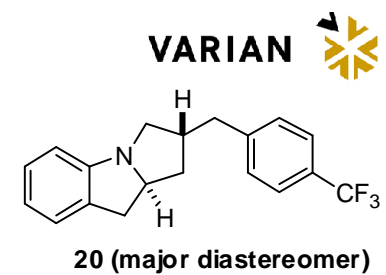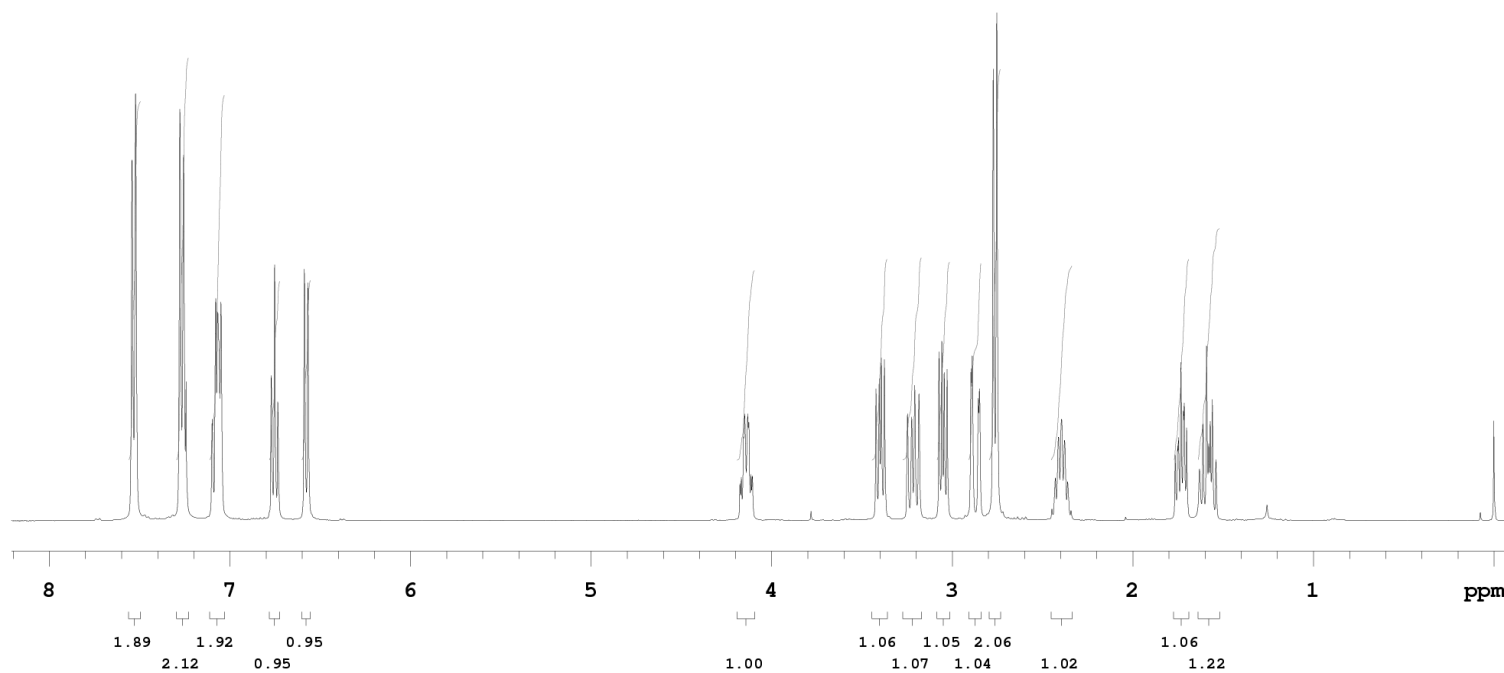



nb1-200-2

Sample Name:

Data Collected on:  
Co.Chem.LSA.UMich.edu-vnmrs400  
Archive directory:

Sample directory:

FidFile: w-dms-nb1-200-2-13C

Pulse Sequence: CARBON (s2pul)  
Solvent: cdcl3  
Data collected on: Sep 25 2009

VARIAN 

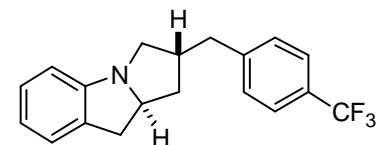

20 (major diastereomer)

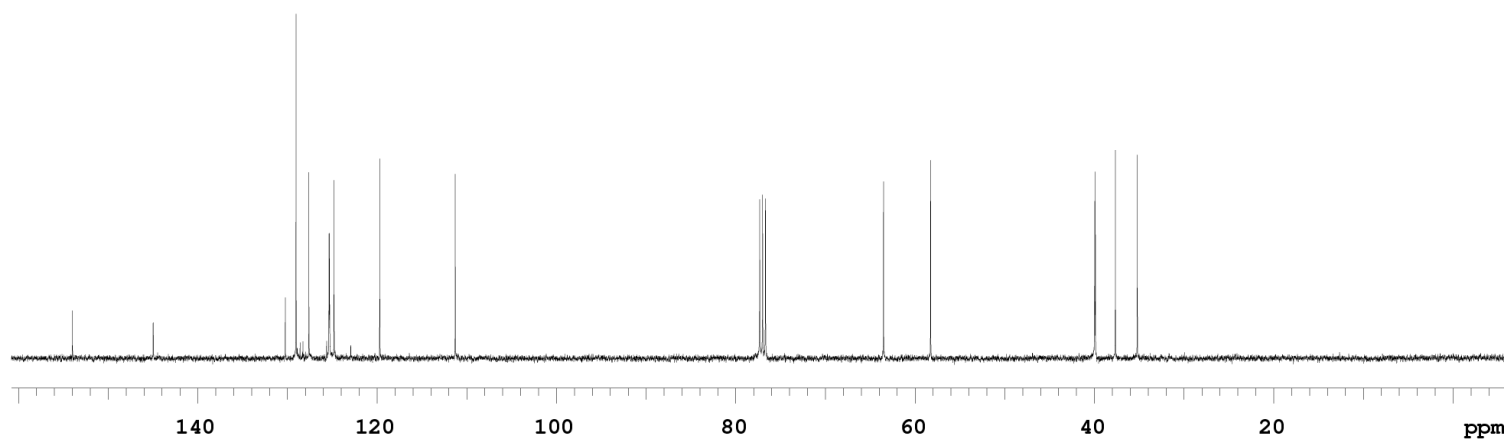

nb3-27-2 minor diastereomer

Sample Name:

Data Collected on:  
Ga.Chem.LSA.UMich.edu-vnmrs400  
Archive directory:

Sample directory:

FidFile: w-dms-nb3-27-2-1H

Pulse Sequence: PROTON (s2pul)  
Solvent: c6d6  
Data collected on: Oct 6 2009

VARIAN 

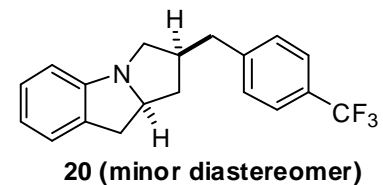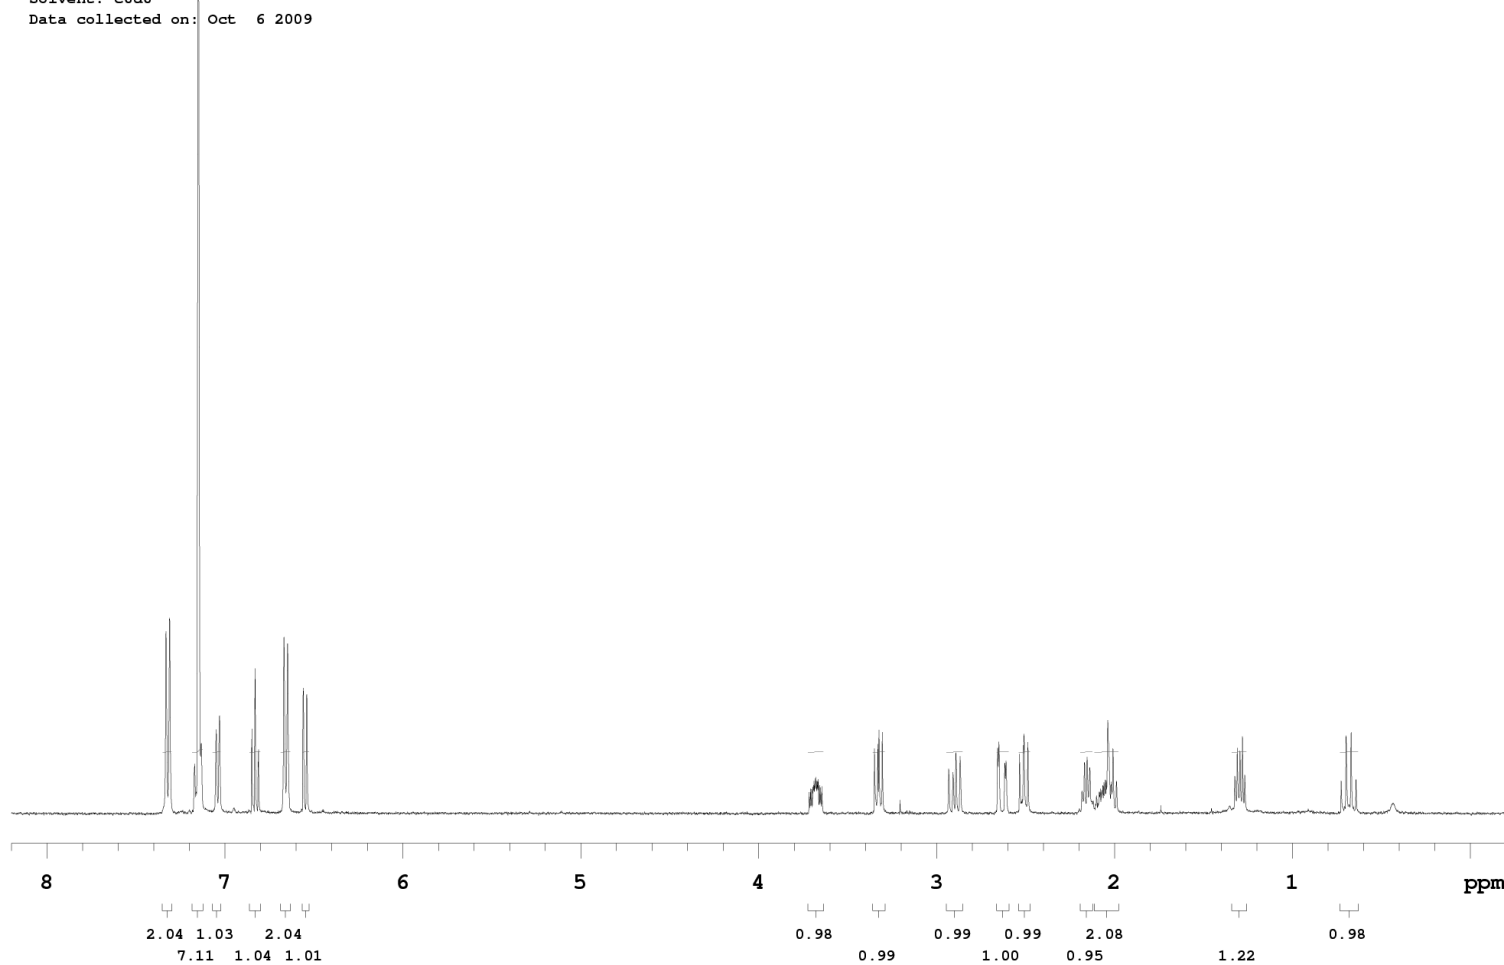

nb3-27-2

Sample Name:

Data Collected on:  
Co.Chem.LSA.UMich.edu-vnmrs400  
Archive directory:

Sample directory:

FidFile: CARBON

Pulse Sequence: CARBON (s2pul)  
Solvent: cdcl3  
Data collected on: Oct 1 2009

VARIAN 

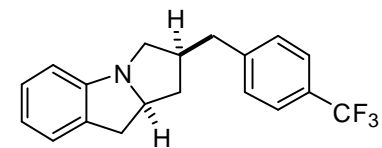

20 (minor diastereomer)

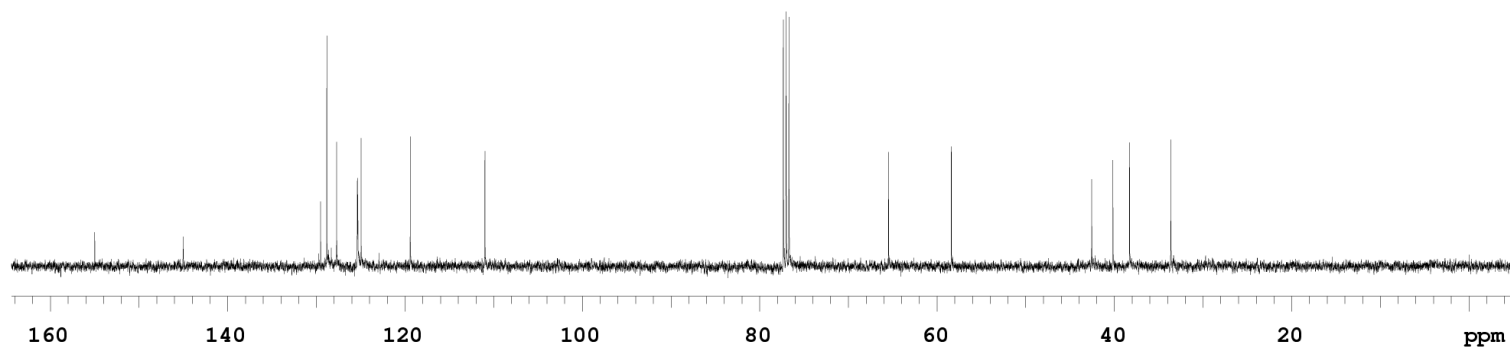

nb3-27-2

Sample Name:

Data Collected on:  
Zr.Chem.LSA,UMich.edu-inova400  
Archive directory:  
/export/home/chempack/vmr/sys/data  
Sample directory:

FidFile: w-dms-nb3-27-2-cosy

Pulse Sequence: gCOSY  
Solvent: c6d6  
Data collected on: Oct 6 2009

Temp. 25.0 C / 298.1 K  
Operator: danims

Relax. delay 1.000 sec  
Acq. time 0.150 sec  
Width 6399.5 Hz  
2D Width 6399.5 Hz  
2 repetitions

128 increments  
OBSERVE H1, 399.9649718 MHz  
DATA PROCESSING  
Sq. sine bell 0.075 sec  
F1 DATA PROCESSING  
Sq. sine bell 0.020 sec  
FT size 2048 x 2048  
Total time 5 min 45 sec

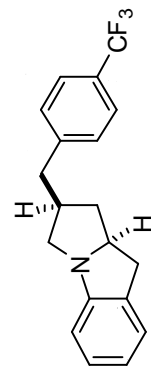

**20 (minor diastereomer)**

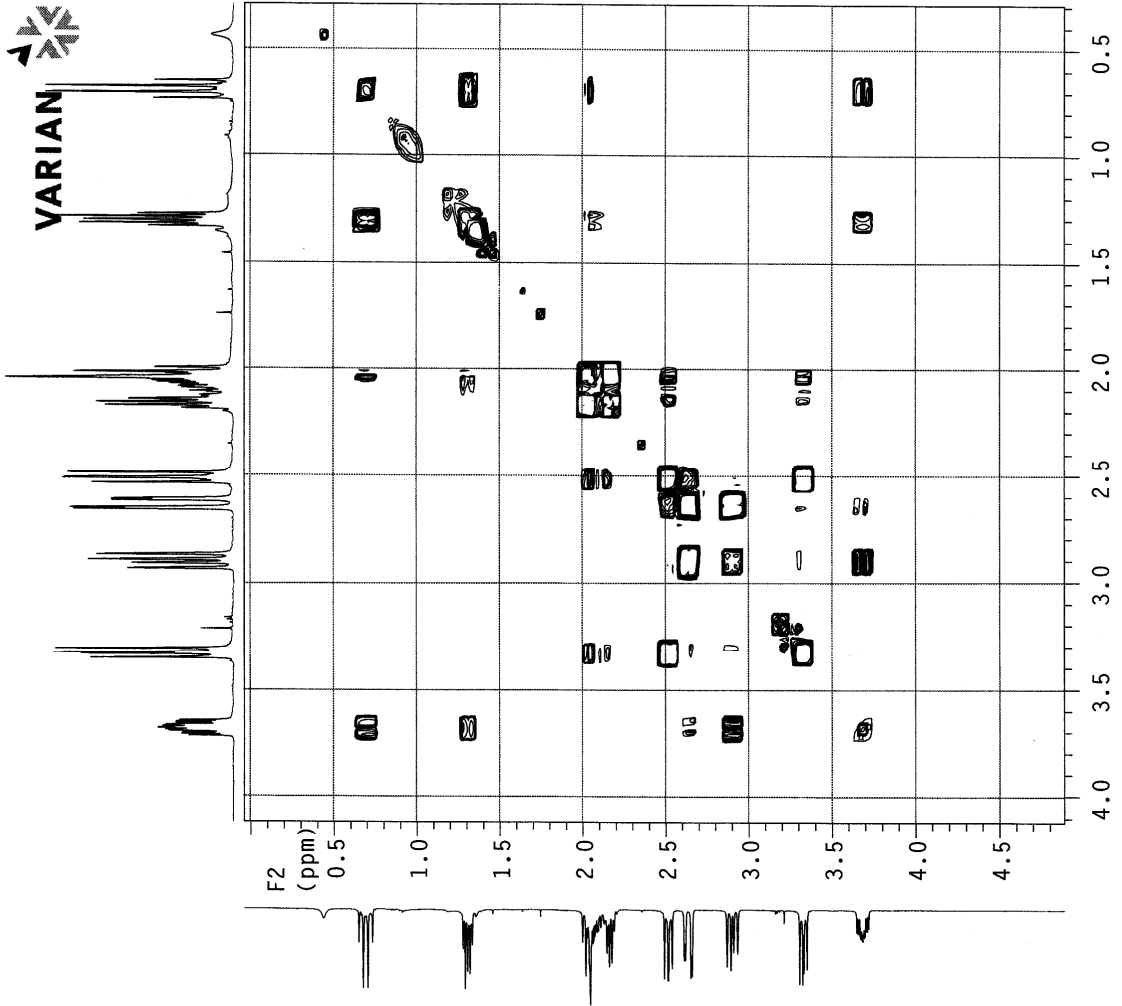

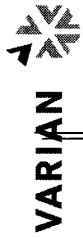

nb3-27-2-noe with longer 500ms mixing time

Sample Name:

Data Collected on:  
Ga.Chem.LSA.UMich.edu-vmrs400  
Archive directory:

Sample directory:

Fidfile: w-dms-nb3-27-2-2r0e

Pulse Sequence: NOESY  
Solvent: c6d6  
Data collected on: Oct 8 2009

Temp. 35.0 C / 308.1 K  
Operator: danims

Relax. delay 1.000 sec  
Acq. time 0.150 sec  
Width 6410.3 Hz  
2D Width 6410.3 Hz  
8 repetitions  
2 x 128 increments  
OBSERVE H1, 399.5389422 MHz  
DATA PROCESSING  
Gauss apodization 0.069 sec  
F1 DATA PROCESSING  
Gauss apodization 0.018 sec  
FT size 2048 x 2048  
Total time 58 min

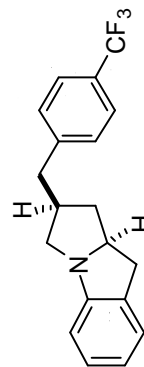

20 (minor diastereomer)

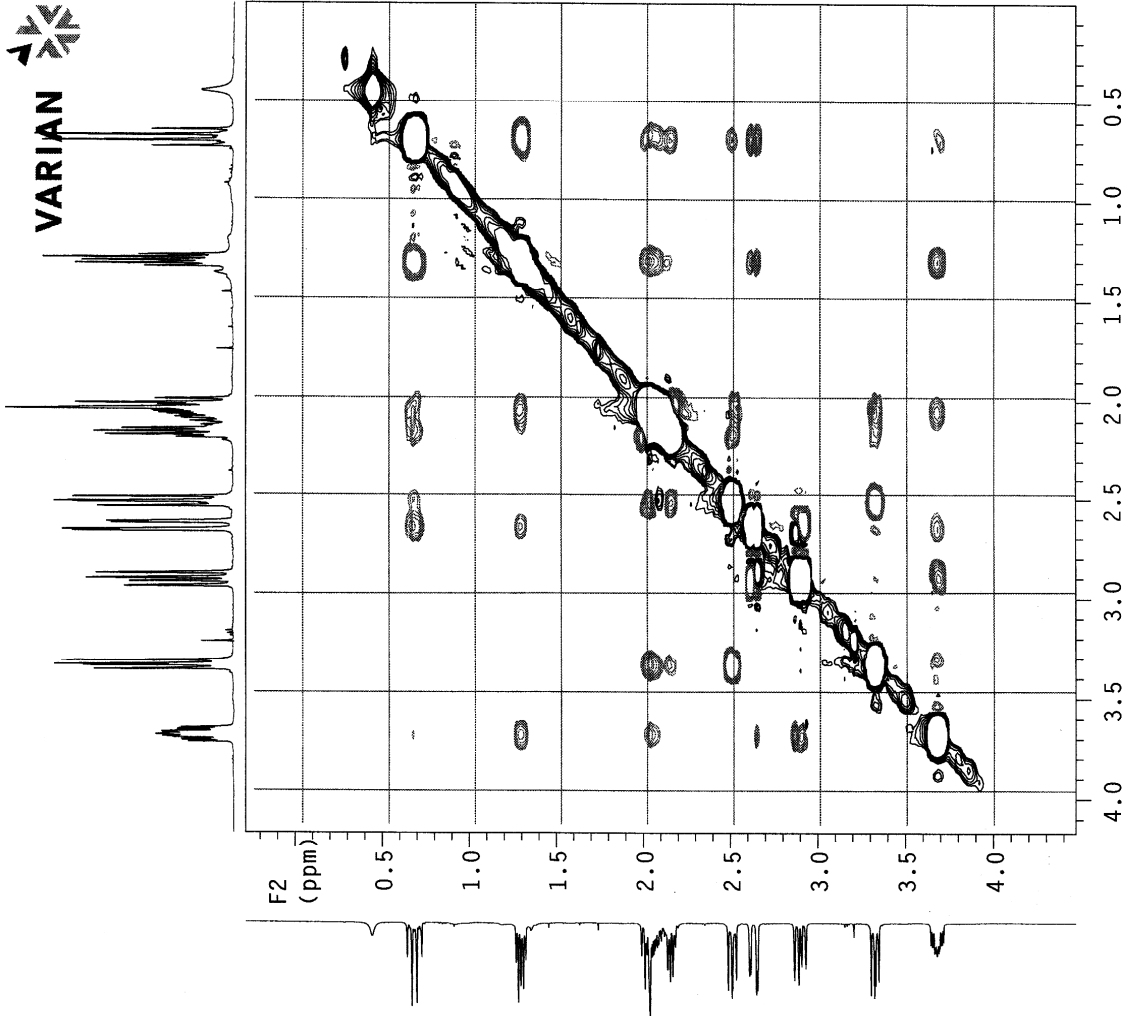

nb1-172-vials5,6,7-fractions 22-36

Sample Name:

Data Collected on:

Ga.Chem.LSA.UMich.Edu-vnmrs400

Archive directory:

Sample directory:

FidFile: w-dms-nb1-172-vials567-frac22-34

Pulse Sequence: PROTON (s2pul)

Solvent: cdcl3

Data collected on: Oct 11 2008

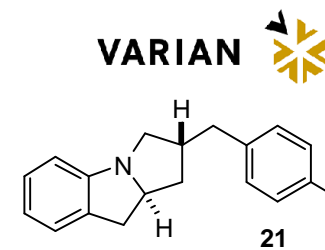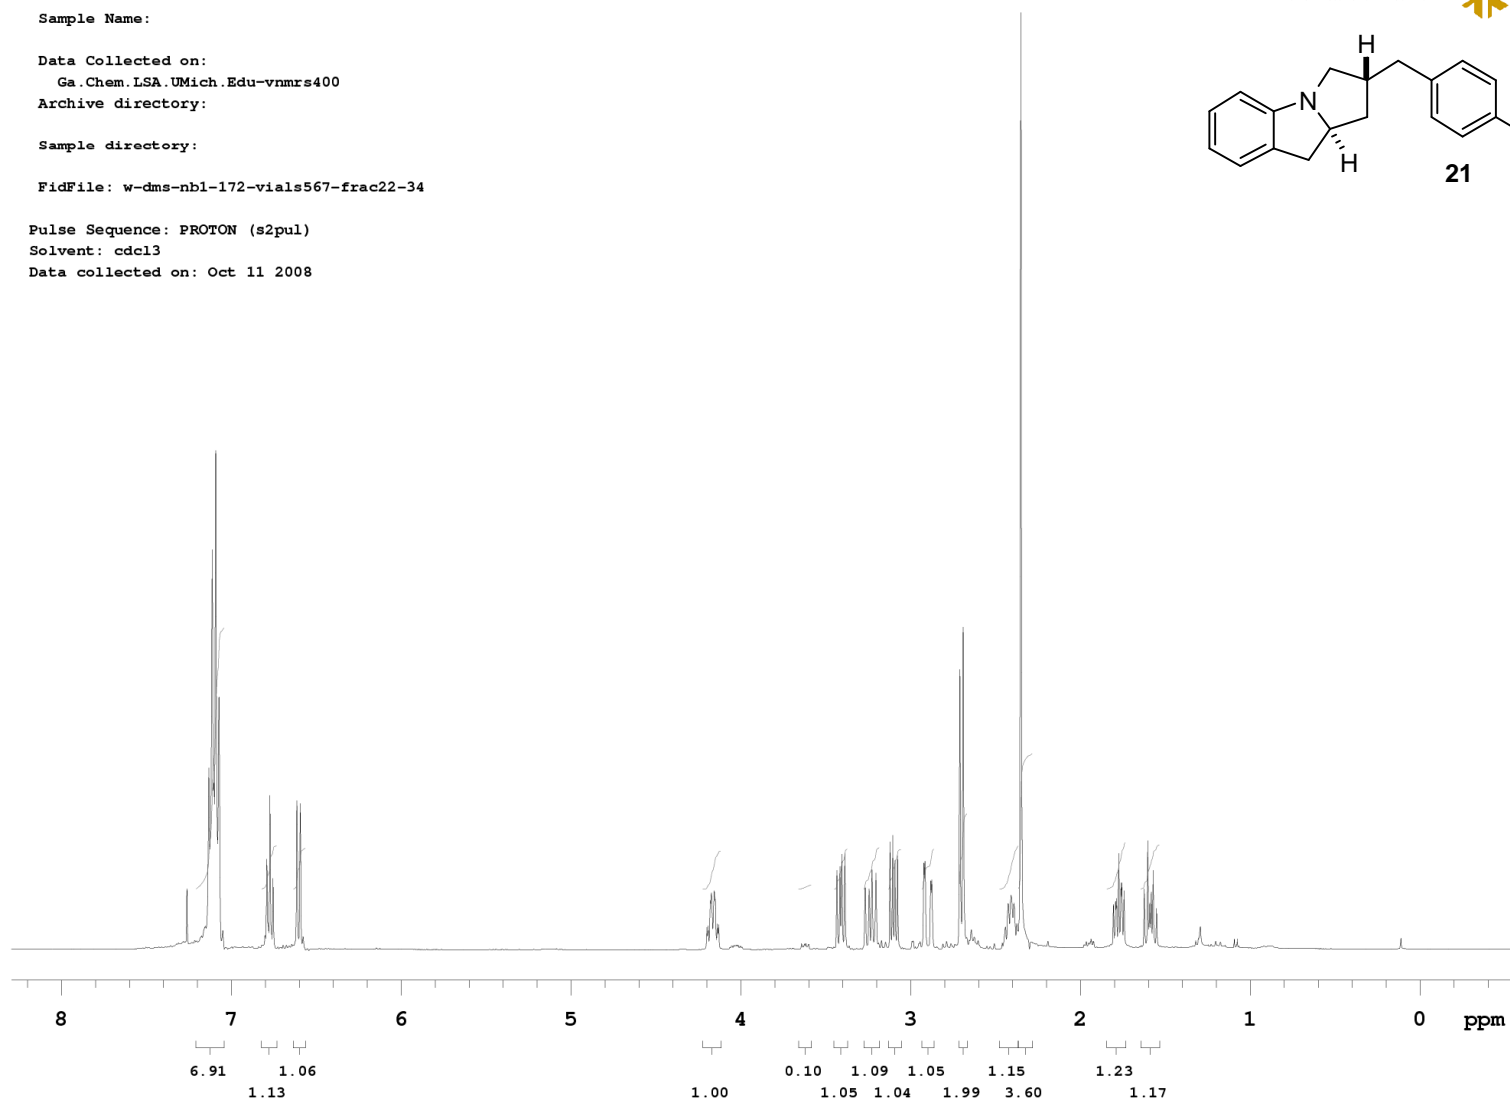

nb1-176-pure

Sample Name:

Data Collected on:  
Co.Chem.LSA.UMich.edu-vnmrs400  
Archive directory:

Sample directory:

FidFile: CARBON

Pulse Sequence: CARBON (s2pul)  
Solvent: cdcl3  
Data collected on: Oct 1 2009

VARIAN 

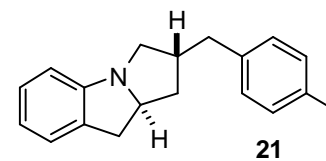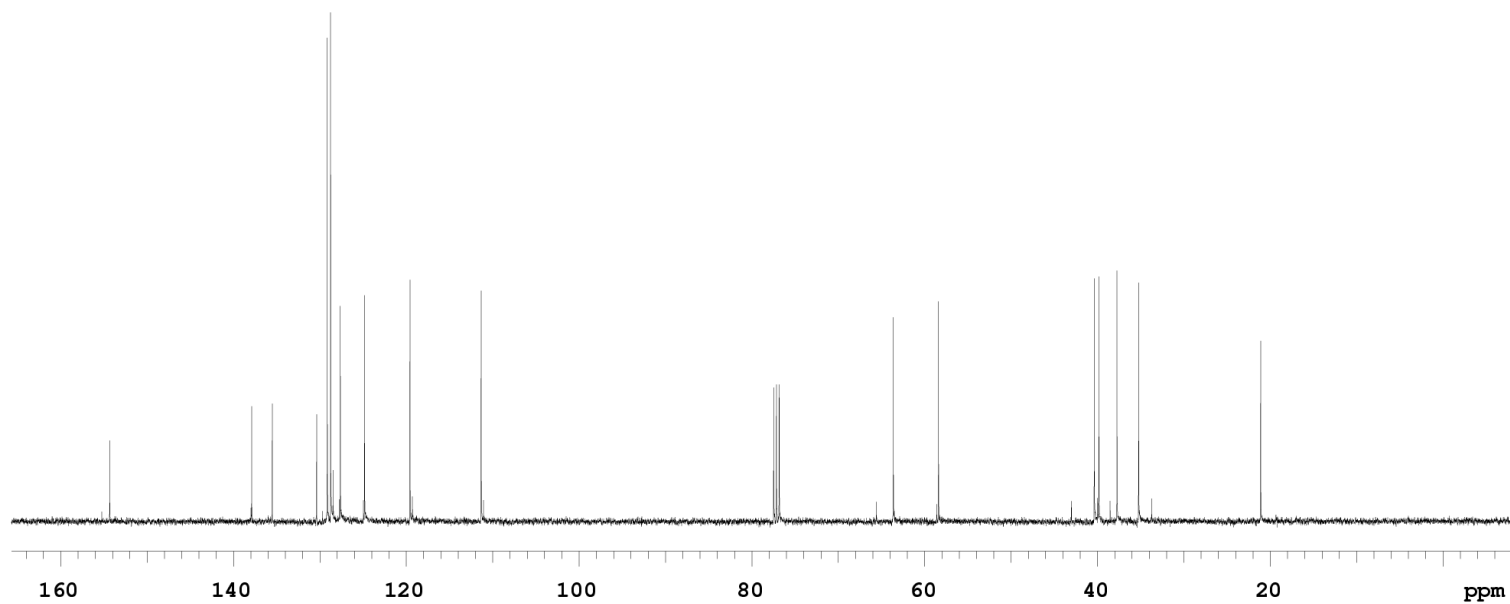

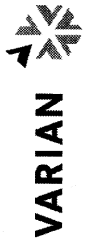

nb1-172-vials5,6,7-fractions 3-7

Sample Name:

Data Collected on:  
Ga.Chem.LSA.UMich.Edu-vmrs400  
Archive directory:

Sample directory:

FidFile: w-dms-nb1-172-cosy-2

Pulse Sequence: gCOSY

Solvent: cdcl3  
Data collected on: Oct 13 2008

Operator: danims

Relax. delay 1.000 sec  
Acq. time 0.150 sec  
Width 6410.3 Hz  
2D Width 6410.3 Hz  
2 repetitions

128 increments  
OBSERVE H1, 399.5389189 MHz  
DATA PROCESSING

Sq. sine bell 0.075 sec  
F1 DATA PROCESSING

Sq. sine bell 0.020 sec  
FT size 2048 x 2048

Total time 3 min 12 sec

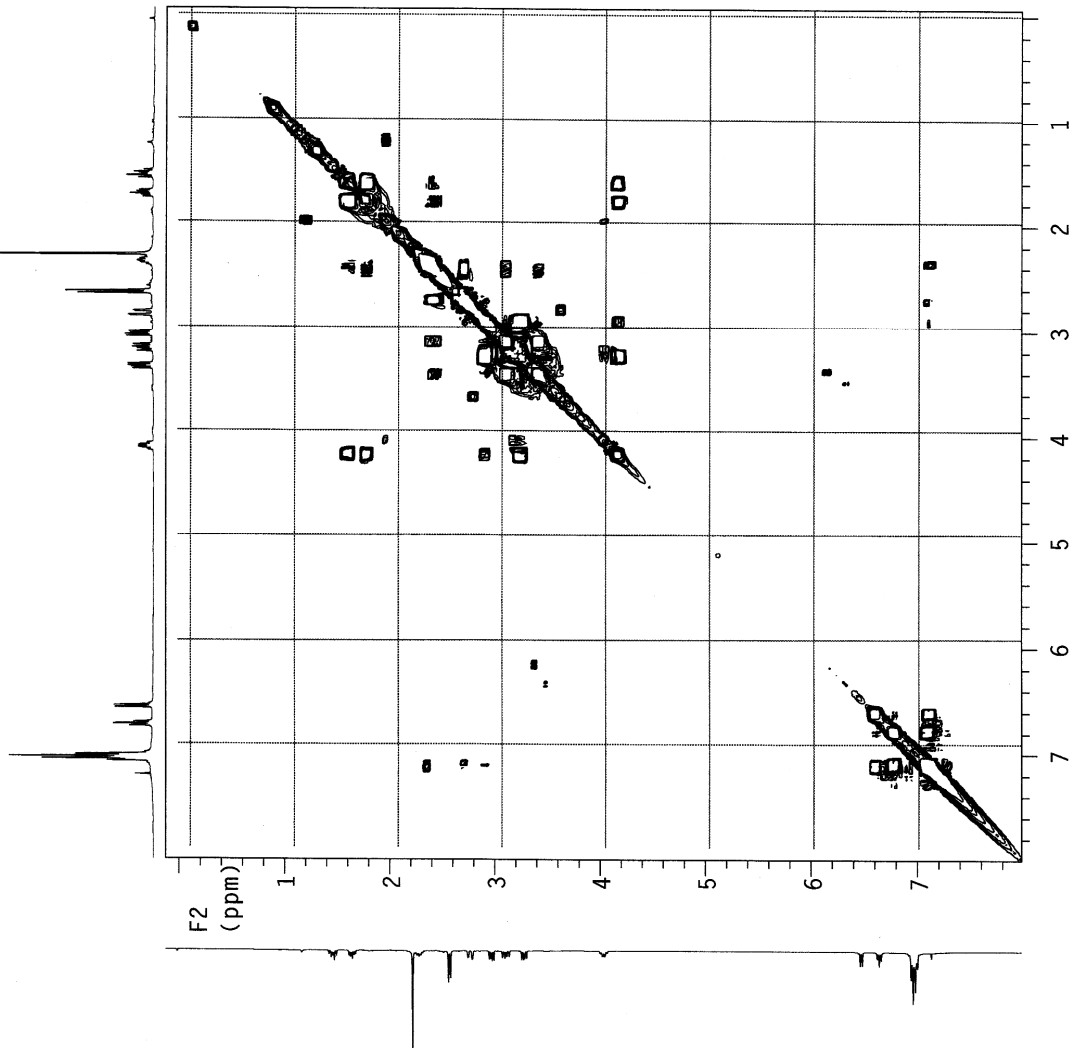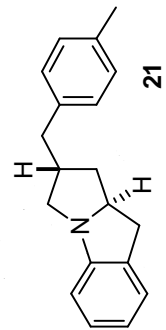



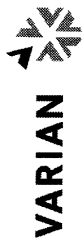

nb1-176-pure

Sample Name:

Data Collected on:  
Co.Chem.LSA-UMich.edu-vmrs400  
Archive directory:

Sample directory:

FidFile: w-dms-nb1-176-1-2noe

Pulse Sequence: NOESY  
Solvent: cdcl3  
Data collected on: Oct 1 2009

Operator: danims

Relax. delay 1.000 sec  
Acq. time 0.150 sec  
Width 6410.3 Hz  
2D Width 6410.3 Hz  
8 repetitions  
2 x 128 increments  
OBSERVE H1, 400.5206029 MHz  
DATA PROCESSING  
Gauss apodization 0.069 sec  
F1 DATA PROCESSING  
Gauss apodization 0.018 sec  
FT size 2048 x 2048  
Total time 47 min

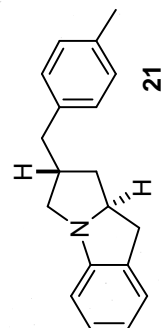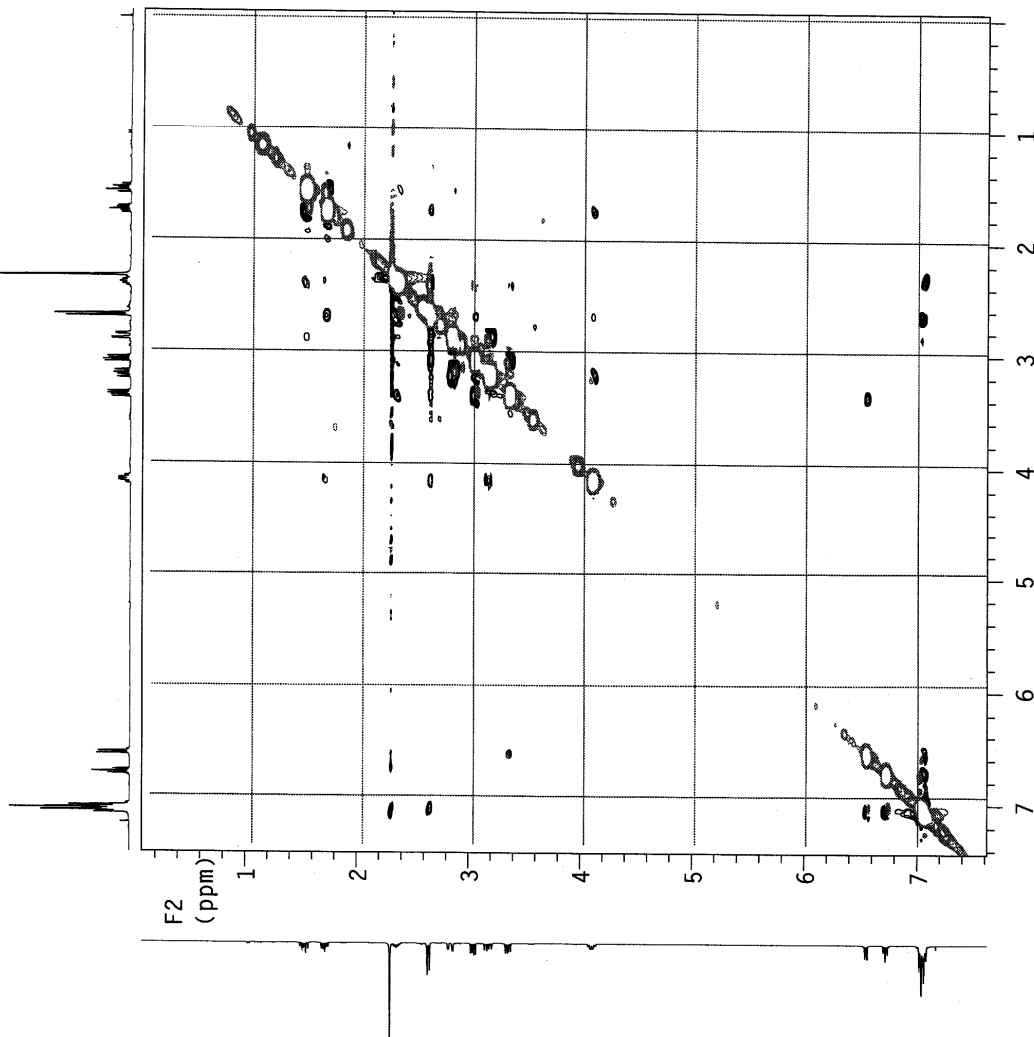

nb1-200-1

Sample Name:

Data Collected on:  
Ga.Chem.LSA.UMich.edu-vnmrs400  
Archive directory:

Sample directory:

FidFile: w-dms-nb1-200-1-1H

Pulse Sequence: PROTON (s2pul)  
Solvent: cdcl3  
Data collected on: Sep 21 2009

VARIAN 

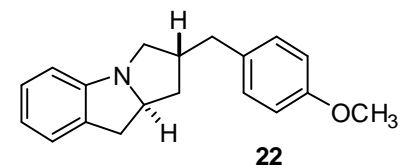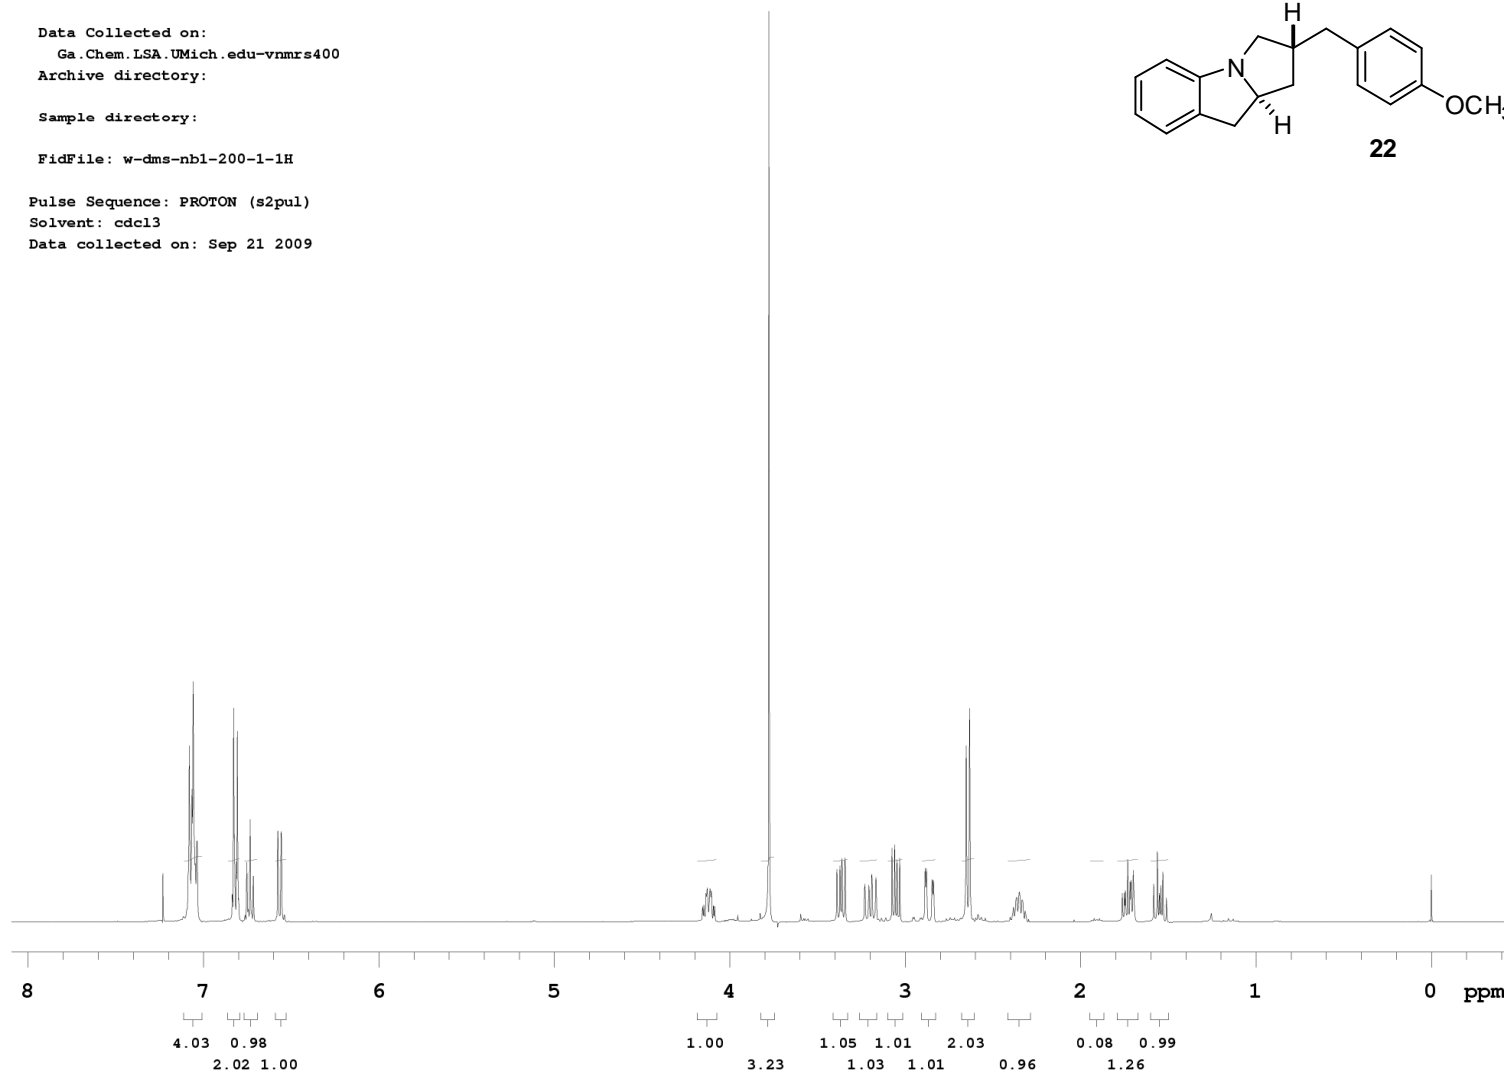

nb1-200-1

Sample Name:

Data Collected on:  
Zr.Chem.LSA.UMich.edu-inova400  
Archive directory:

Sample directory:

FidFile: w-dms-nb1-200-1-13C-dry

Pulse Sequence: CARBON (s2pul)  
Solvent: cdcl3  
Data collected on: Aug 21 2009

VARIAN 

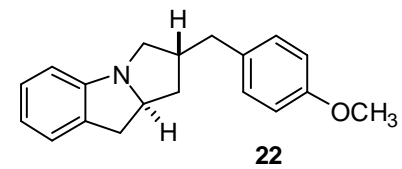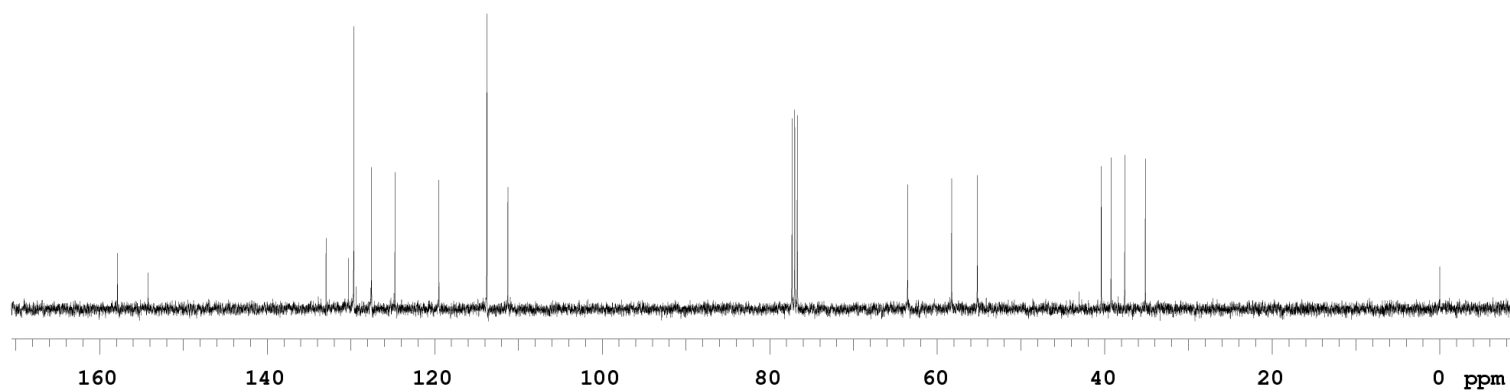

nb2-143-1

Sample Name:

Data Collected on:

Zr.Chem.LSA.UMich.edu-inova400

Archive directory:

/export/home/chempack/vnmrsys/data

Sample directory:

FidFile: dms-nb2-143-1-1H

Pulse Sequence: PROTON (s2pul)

Solvent: cdcl3

Data collected on: Sep 22 2009

VARIAN 

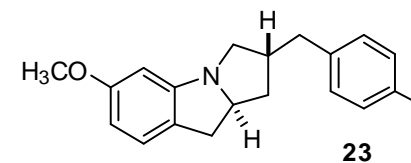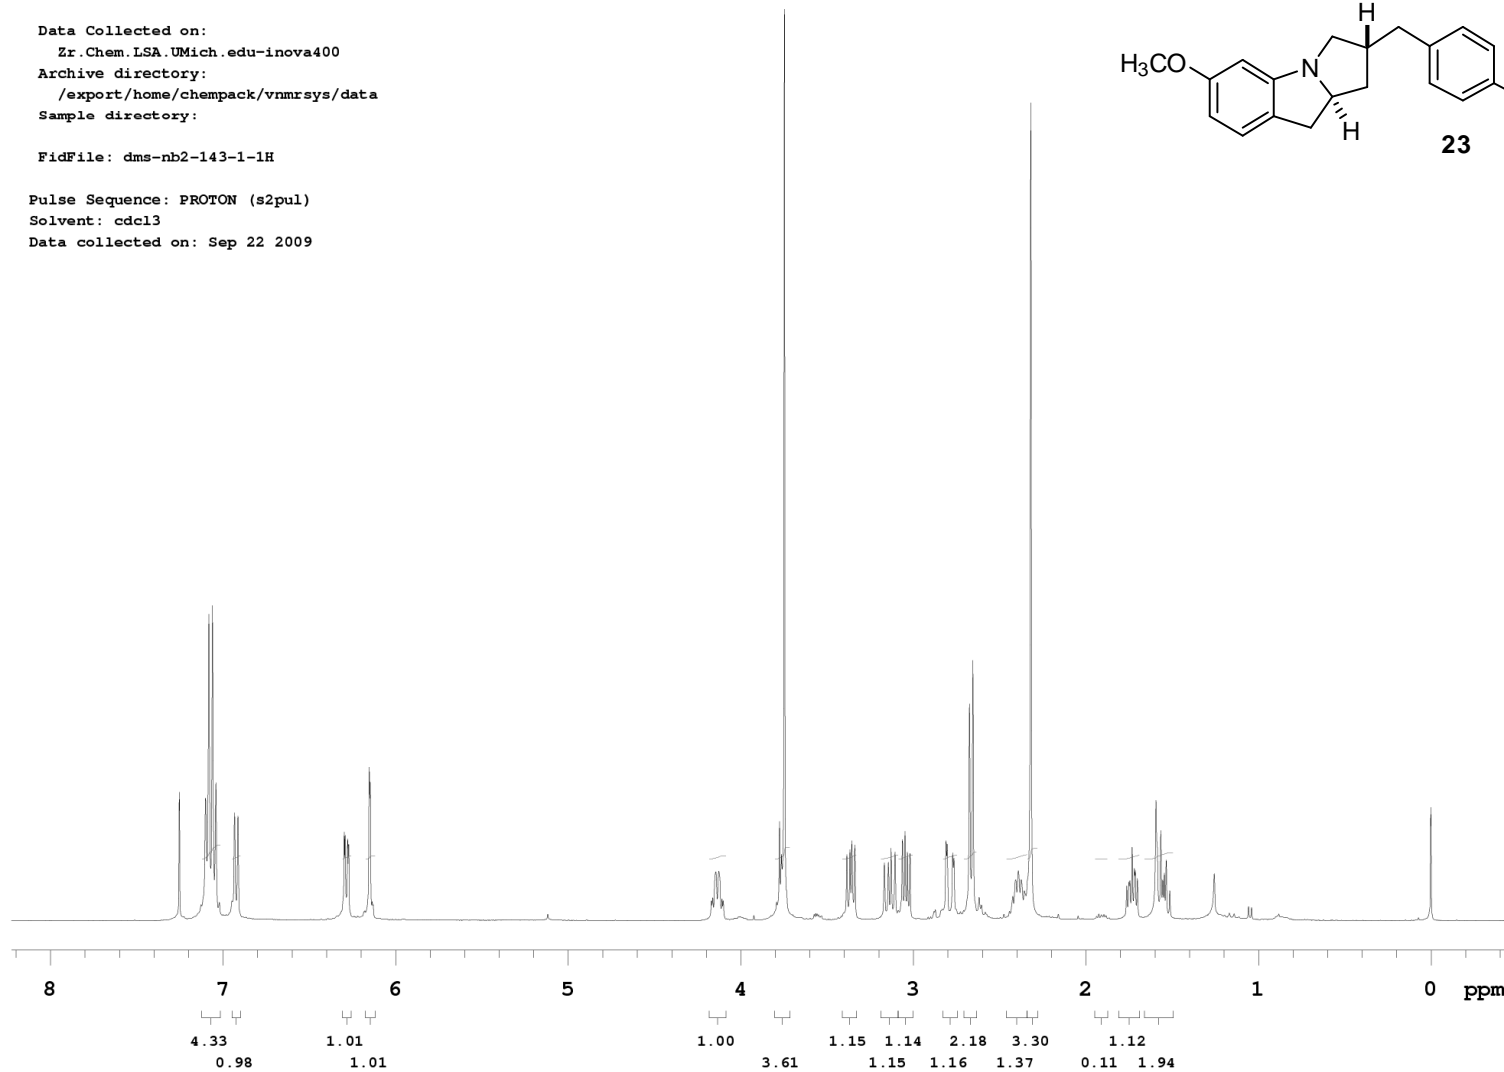

nb2-143-1-pure

Sample Name:

Data Collected on:  
Zr.Chem.LSA.UMich.edu-inova400

Archive directory:

Sample directory:

FidFile: w-dms-nb2-143-1-13C

Pulse Sequence: CARBON (s2pul)  
Solvent: cdcl3  
Data collected on: Aug 20 2009

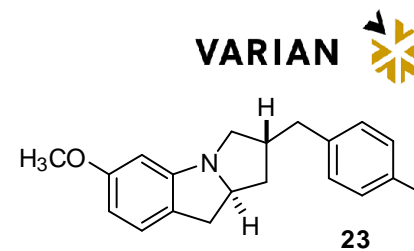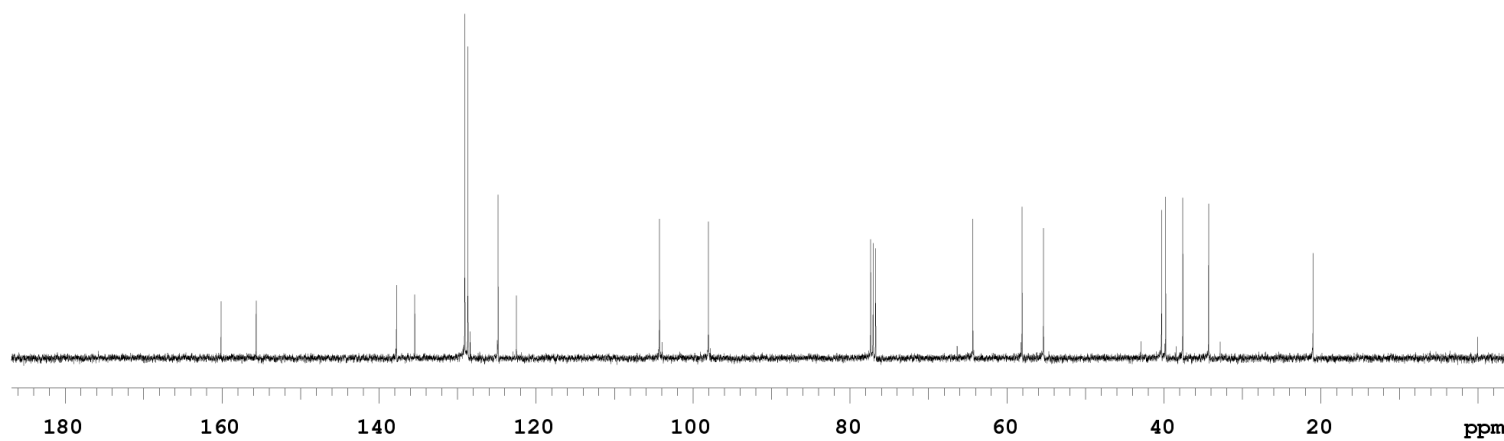

nb3-21-2

Sample Name:

Data Collected on:

Zr.Chem.LSA.UMich.edu-inova400

Archive directory:

/export/home/chempack/vnmrsys/data

Sample directory:

FidFile: w-dms-nb3-21-2-1H

Pulse Sequence: PROTON (s2pul)

Solvent: cdcl3

Data collected on: Sep 23 2009

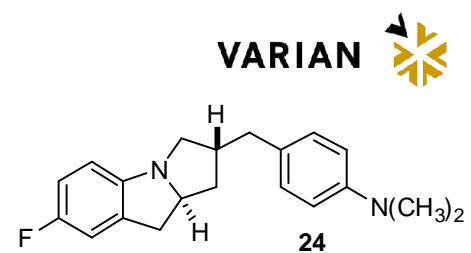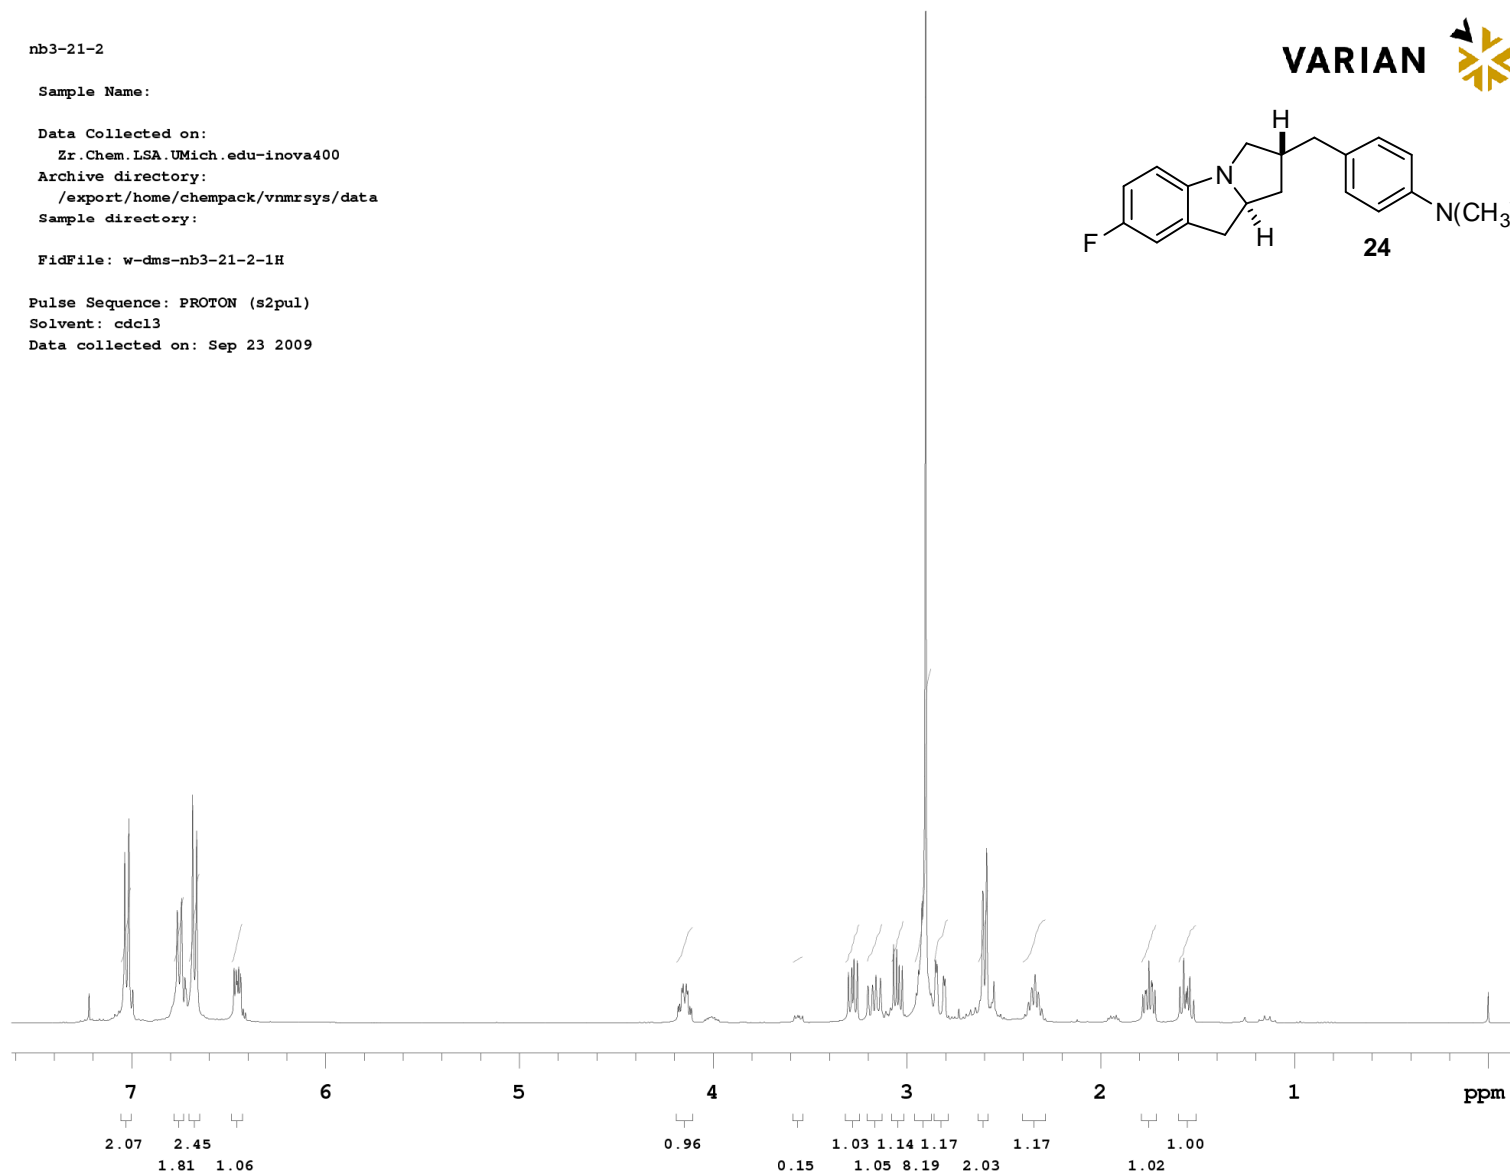

nb3-21-2

Sample Name:

Data Collected on:

Zr.Chem.LSA.UMich.edu-inova400

Archive directory:

/export/home/chempack/vnmrsys/data

Sample directory:

FidFile: w-dms-nb3-21-2-13C

Pulse Sequence: CARBON (s2pul)

Solvent: cdcl3

Data collected on: Sep 23 2009

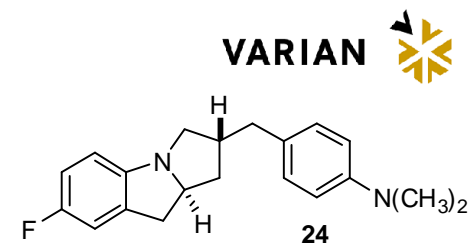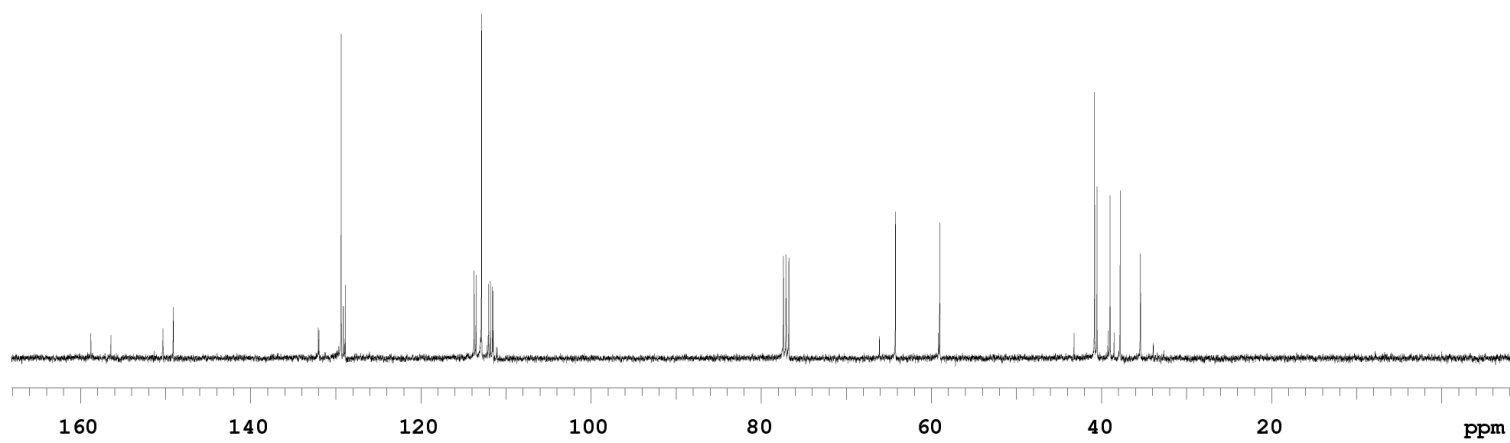

nb2-188-2

Sample Name:

Data Collected on:

Zr.Chem.LSA.UMich.edu-inova400

Archive directory:

/export/home/chempack/vnmrsys/data

Sample directory:

FidFile: w-dms-nb2-188-2-pure

Pulse Sequence: PROTON (s2pul)

Solvent: cdcl3

Data collected on: Sep 21 2009

VARIAN 

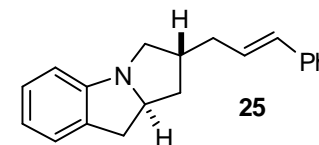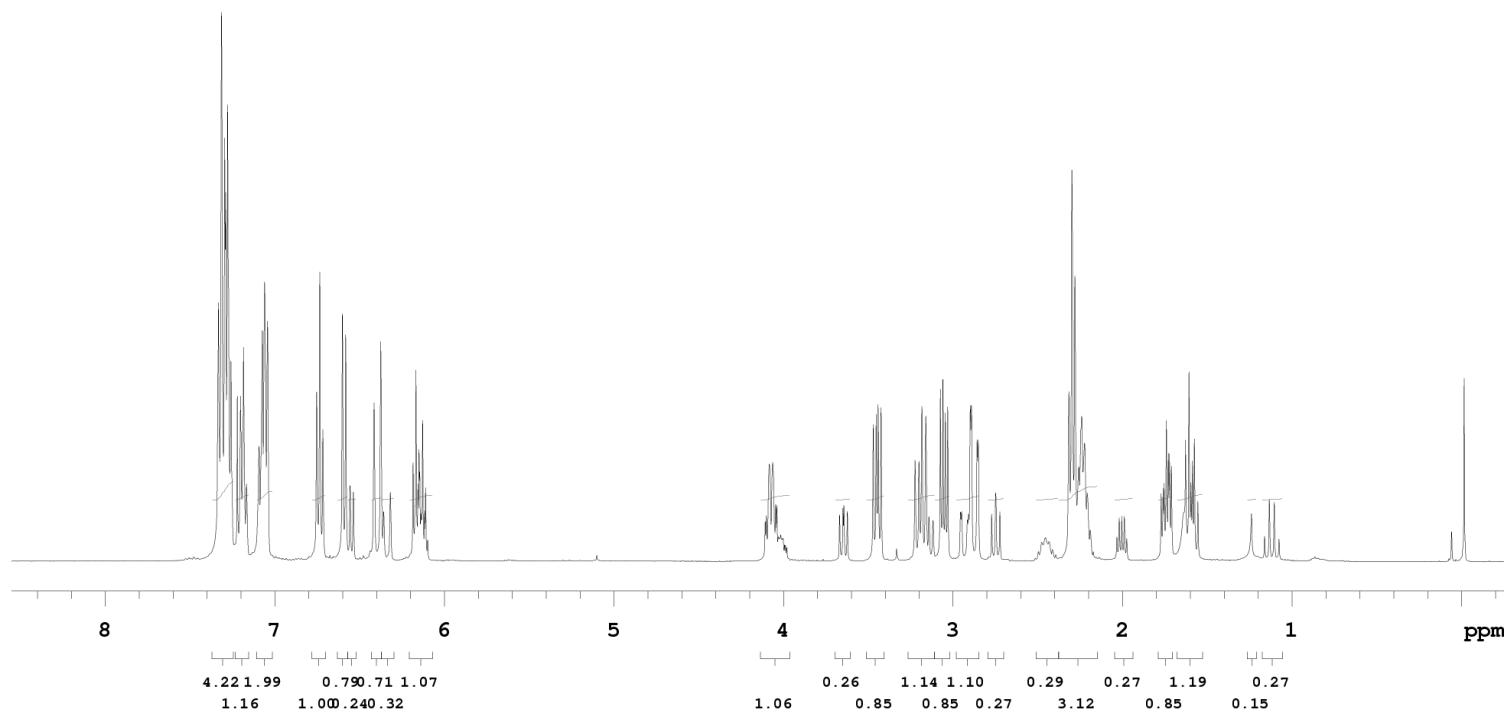



nb2-188-2

Sample Name:

Data Collected on:  
Zr.Chem.LSA.UMich.edu-inova400  
Archive directory:

Sample directory:

FidFile: w-dms-nb2-188-2-13C

Pulse Sequence: CARBON (s2pul)  
Solvent: cdcl3  
Data collected on: Aug 13 2009

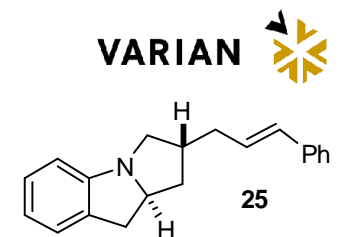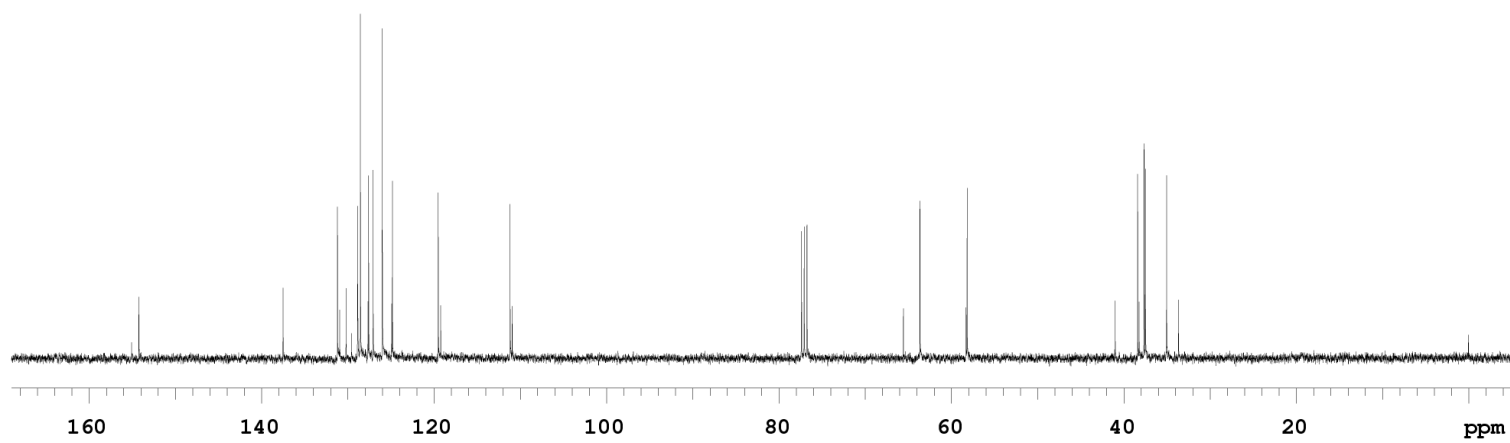

nb2-173-2

Sample Name:

Data Collected on:

Ga.Chem.LSA.UMich.edu-vnmrs400

Archive directory:

Sample directory:

FidFile: w-dms-nb2-173-2-1H

Pulse Sequence: PROTON (s2pul)

Solvent: cdcl3

Data collected on: Sep 21 2009

VARIAN 

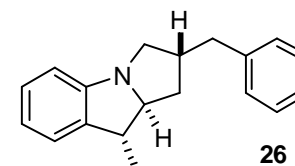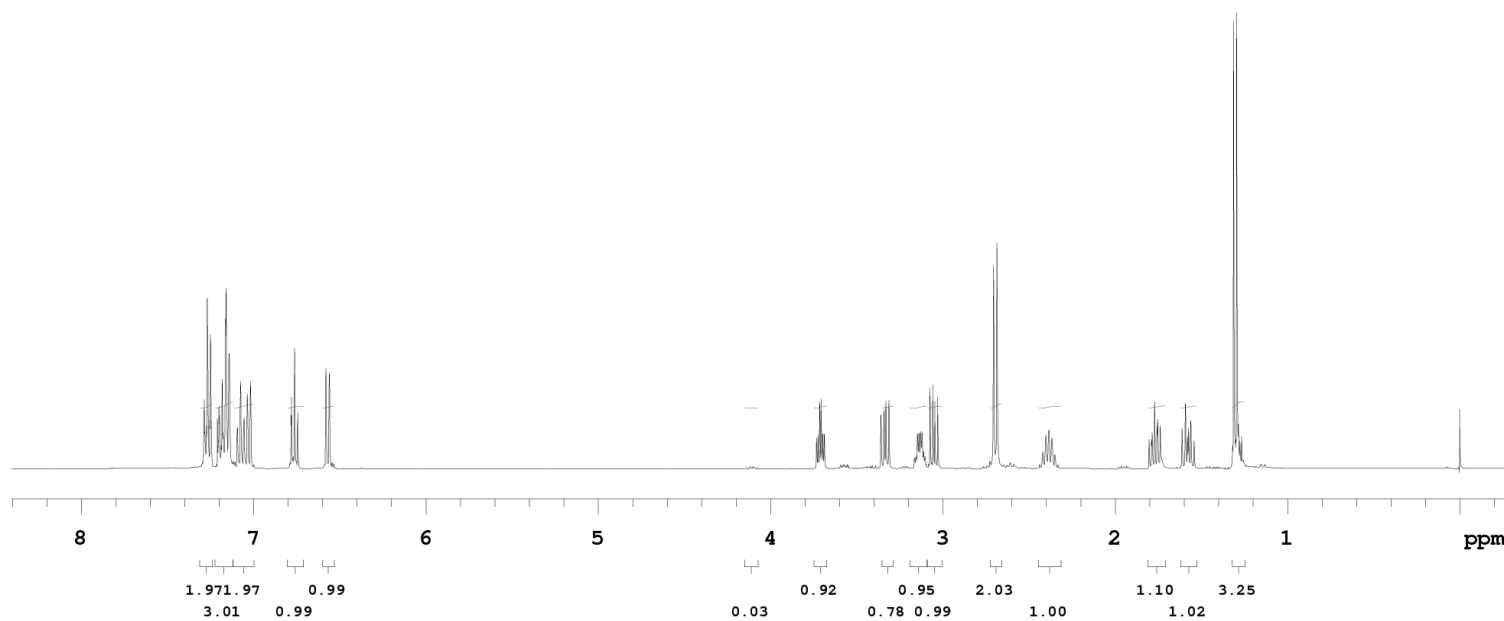

dms-nb2-173-1

Sample Name:

Data Collected on:

Ga.Chem.LSA.UMich.edu-vnmrs400

Archive directory:

Sample directory:

FidFile: w-dms-nb2-173-1-13C

Pulse Sequence: CARBON (s2pul)

Solvent: cdcl3

Data collected on: Jul 15 2009

VARIAN 

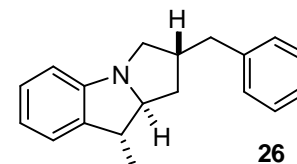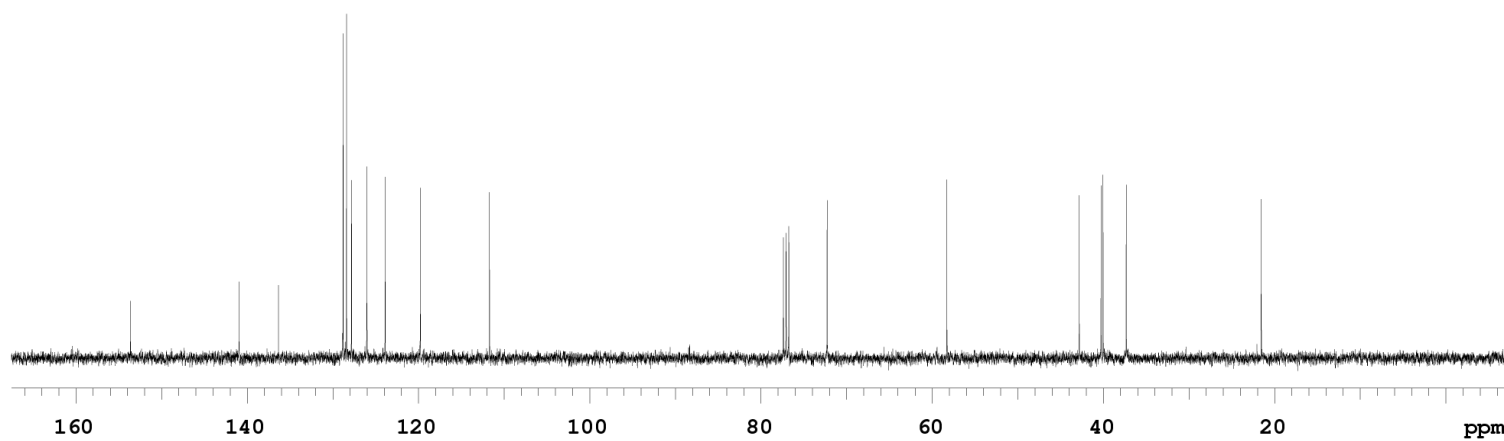

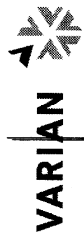

nb2-173-2-acid base wash

Sample Name:

Data Collected on:  
Zr.Chem.LSA.UMich.edu-inova400  
Archive directory:

Sample directory:

FidFile: w-dms-nb2-173-2-2cosy

Pulse Sequence: gCOSY  
Solvent: cdcl3  
Data collected on: Jul 16 2009

Temp. 25.0 C / 298.1 K  
Operator: danims

Relax. delay 1.000 sec  
Acq. time 0.150 sec  
Width 3203.1 Hz  
2D Width 3203.1 Hz  
Single scan

128 increments  
OBSERVE H1, 399.9649781 MHz  
DATA PROCESSING

Sq. sine bell 0.075 sec  
F1 DATA PROCESSING  
Sq. sine bell 0.040 sec  
FT size 1024 x 1024  
Total time 3 min 13 sec

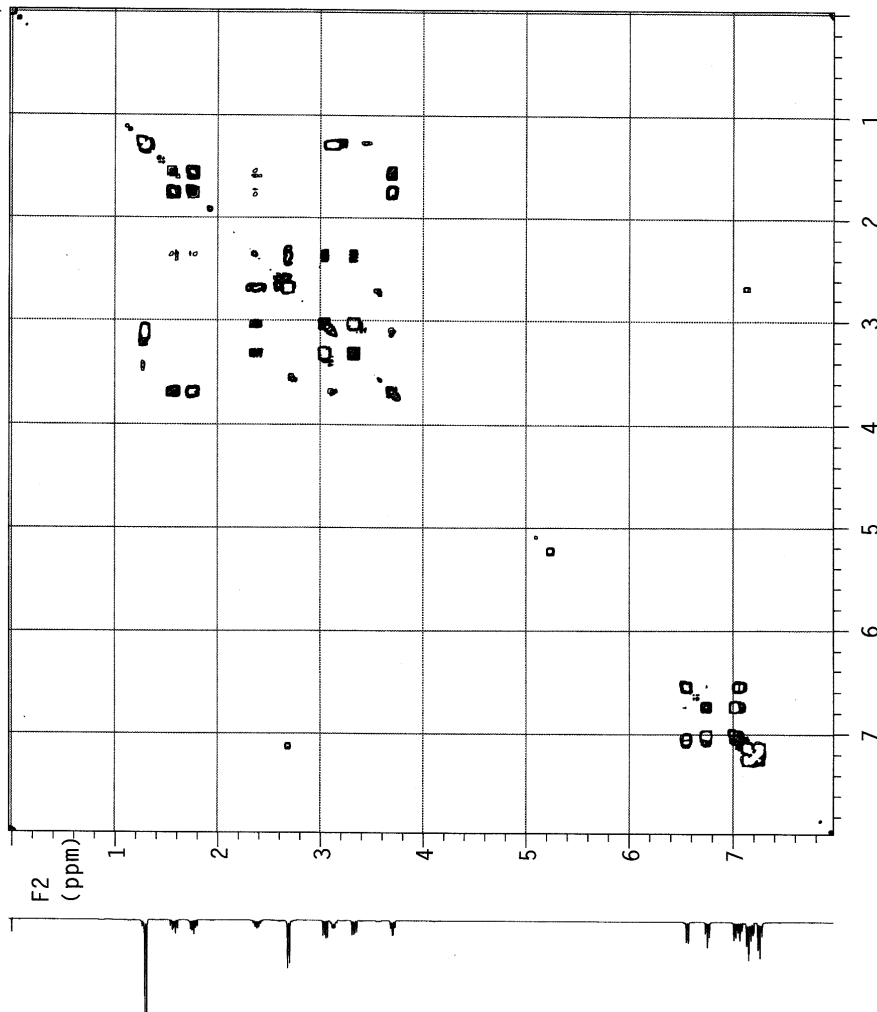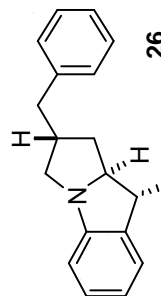

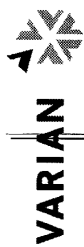

nb2-173-2-r0e

Sample Name:

Data Collected on:  
Co.Chem.LSA.UMich.edu-vnmrs400  
Archive directory:

Sample directory:

FidFile: w-dms-nb2-173-2-2n0e

Pulse Sequence: NOESY

Solvent: cdcl3  
Data collected on: Jul 16 2009

Temp. 25.0 C / 298.1 K  
Operator: danims

Relax. delay 1.000 sec  
Acq. time 0.150 sec  
Width 3221.6 Hz  
2D Width 3221.6 Hz  
4 repetitions  
2 x 200 increments

OBSERVE H1, 400.5205814 MHZ  
DATA PROCESSING  
Gauss apodization 0.069 sec  
F1 DATA PROCESSING  
Gauss apodization 0.057 sec  
FT size 2048 x 2048  
Total time 37 min

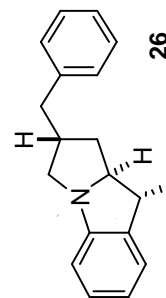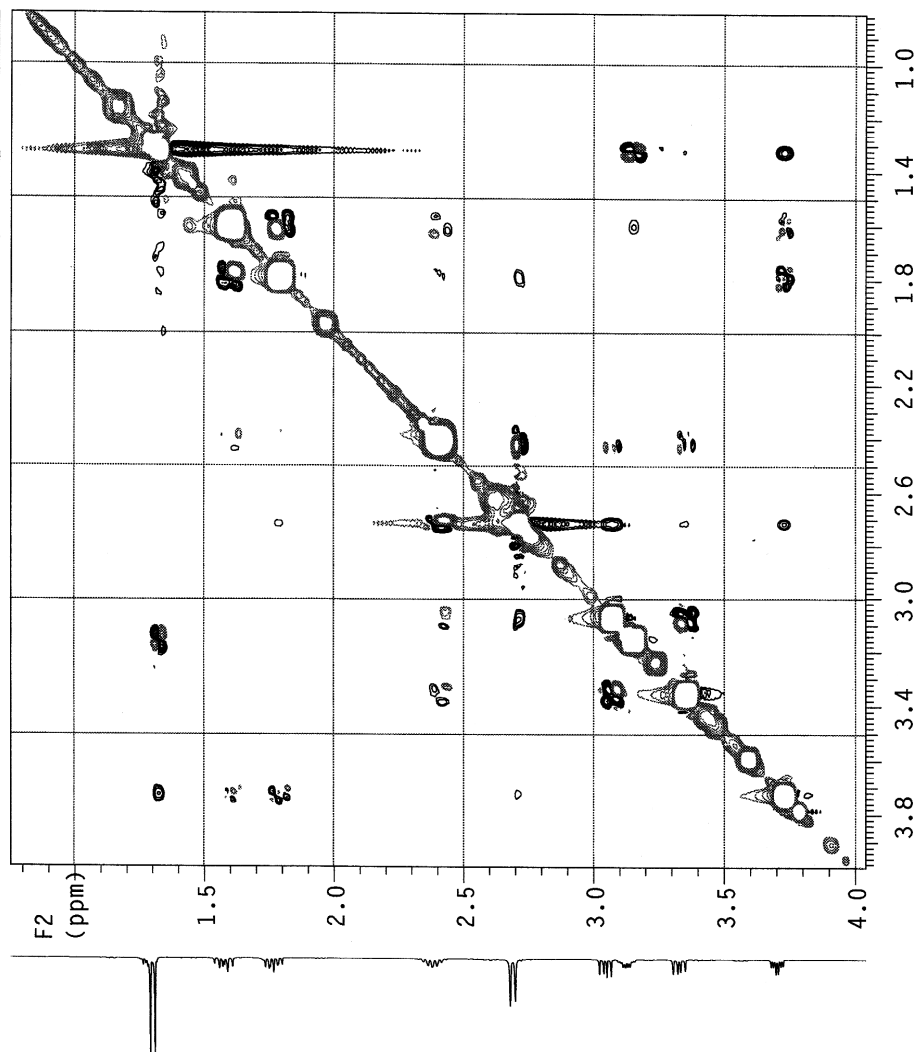

nb2-179-1-

Sample Name:

Data Collected on:  
Zr.Chem.LSA.UMich.edu-inova400

Archive directory:

Sample directory:

FidFile: w-dms-nb2-179-1-1H

Pulse Sequence: PROTON (s2pul)

Solvent: cdcl3

Data collected on: Jul 31 2009

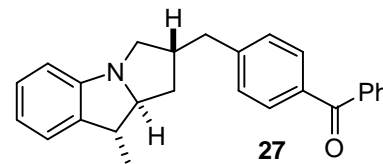

VARIAN

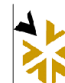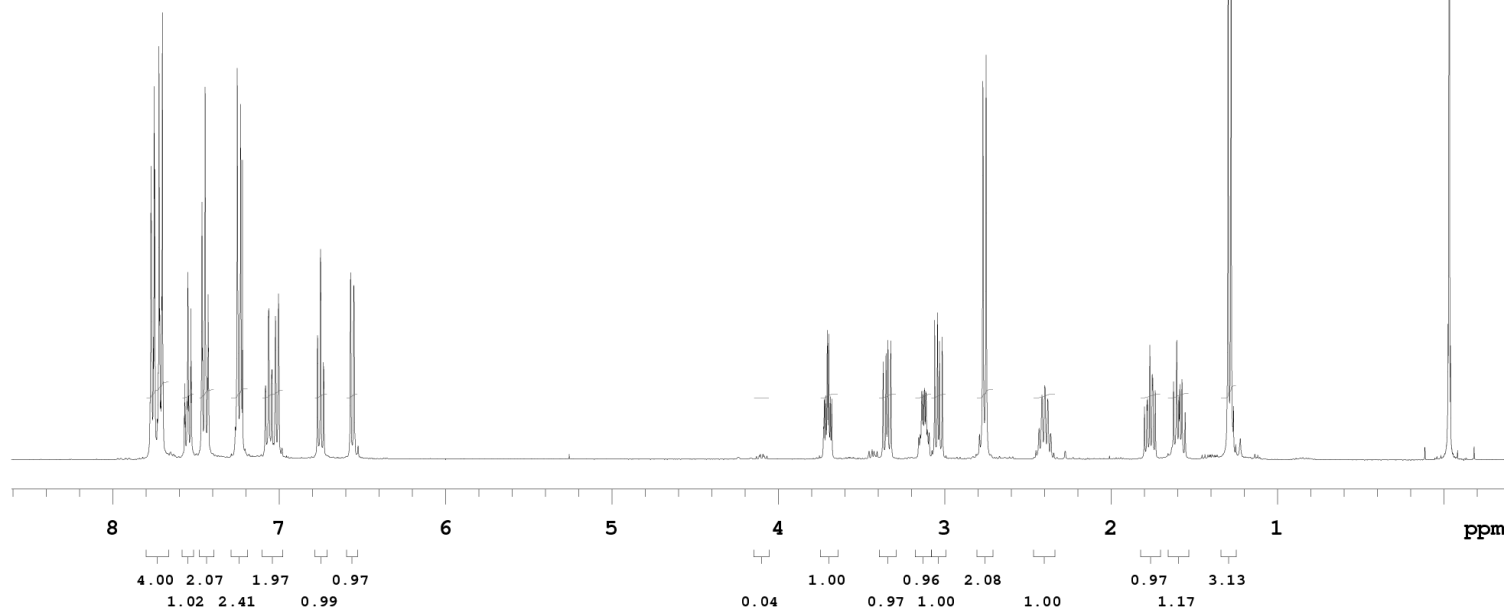

nb2-179-2-pure

Sample Name:

Data Collected on:

Zr.Chem.LSA.UMich.edu-inova400

Archive directory:

Sample directory:

FidFile: w-dms-nb2-179-2-13C

Pulse Sequence: CARBON (s2pul)

Solvent: cdcl3

Data collected on: Aug 1 2009

VARIAN 

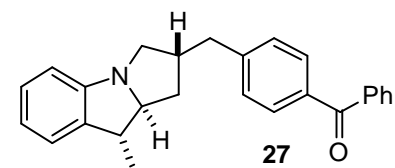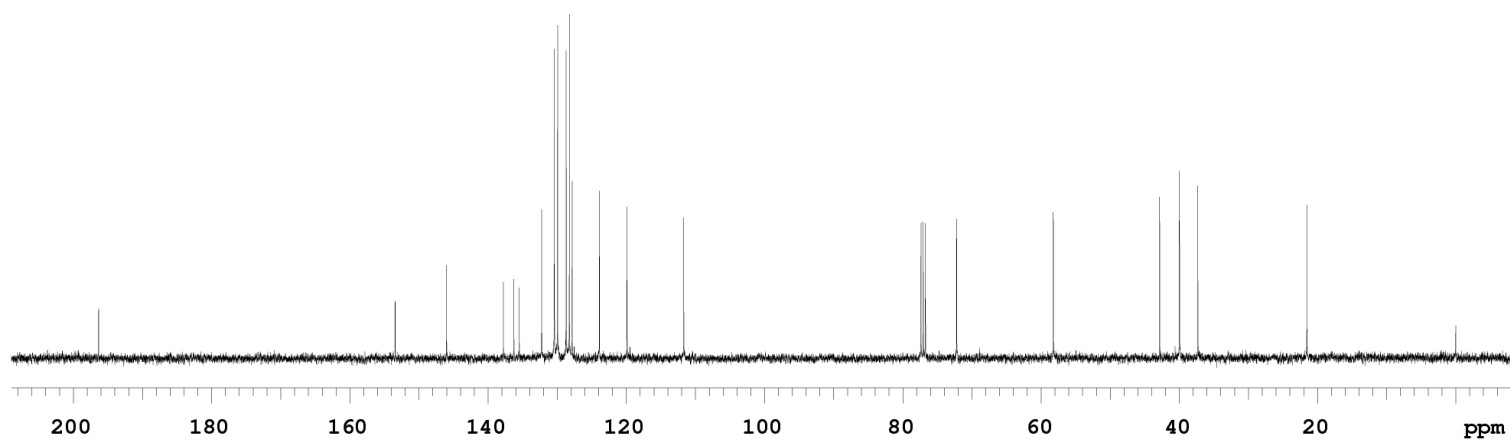

nb2-153-1

Sample Name:

Data Collected on:

Ga.Chem.LSA.UMich.edu-vnmrs400

Archive directory:

Sample directory:

FidFile: w-dms-nb2-153-1

Pulse Sequence: PROTON (s2pul)

Solvent: cdcl3

Data collected on: Dec 11 2009

VARIAN 

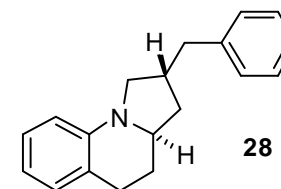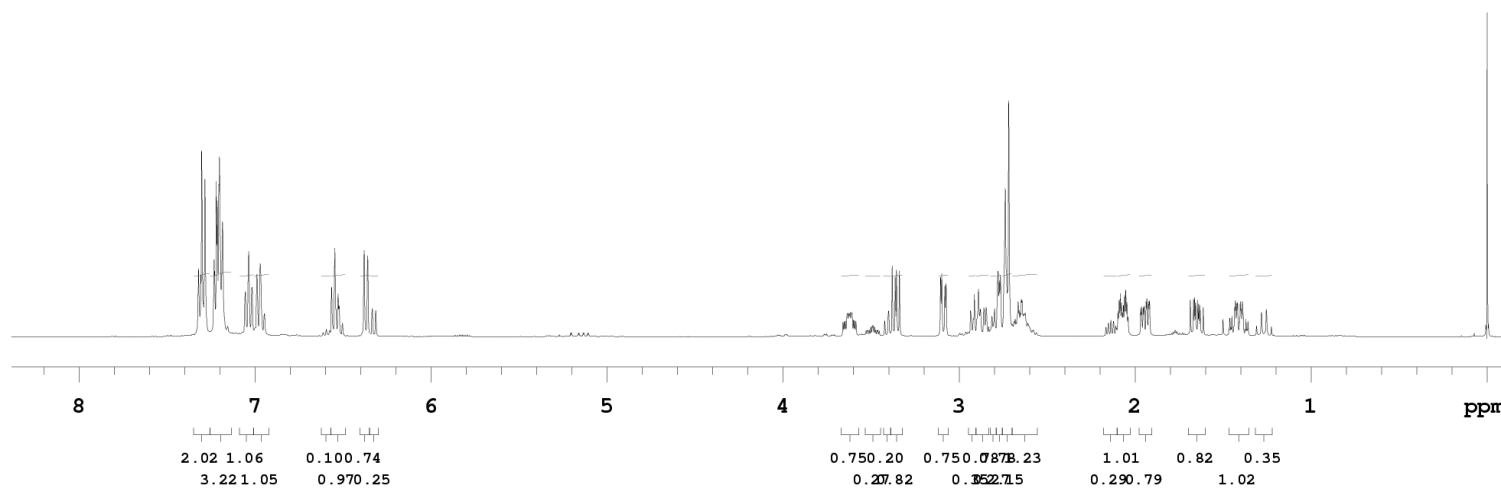



nb2-153-1

Sample Name:

Data Collected on:

Ga.Chem.LSA.UMich.edu-vnmrs400

Archive directory:

Sample directory:

FidFile: CARBON

Pulse Sequence: CARBON (s2pul)

Solvent: cdcl3

Data collected on: Dec 11 2009

VARIAN 

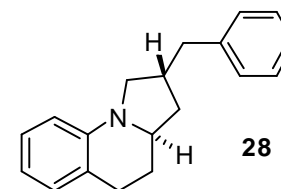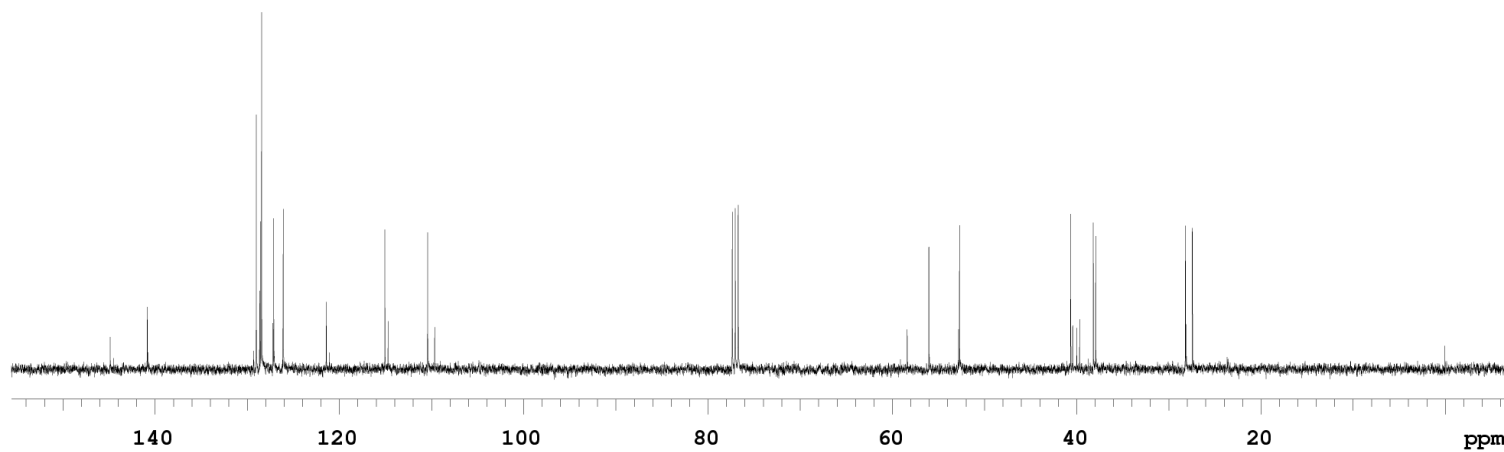

nb2-171-1

Sample Name:

Data Collected on:

Zr.Chem.LSA.UMich.edu-inova400

Archive directory:

Sample directory:

FidFile: w-dms-nb2-171-1-1H-CDC13

Pulse Sequence: PROTON (s2pul)

Solvent: cdcl3

Data collected on: Aug 19 2009

VARIAN 

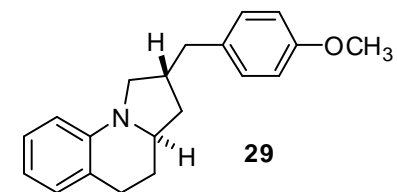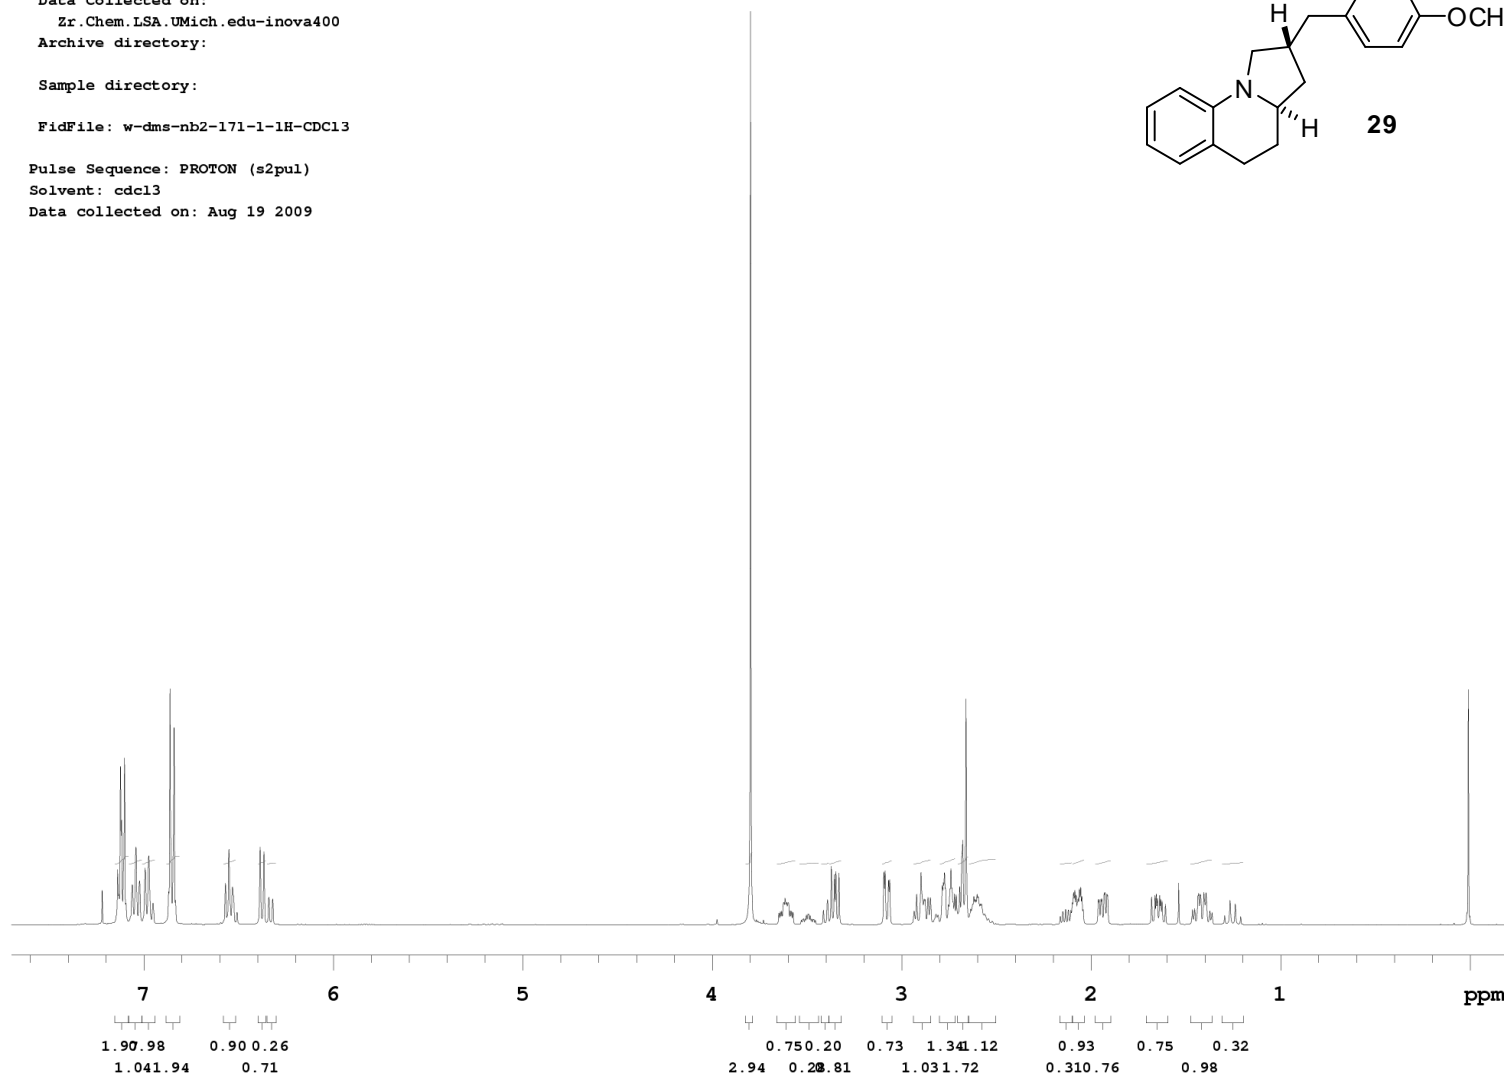

nb2-171-1

Sample Name:

Data Collected on:  
Zr.Chem.LSA.UMich.edu-inova400  
Archive directory:

Sample directory:

FidFile: w-dms-nb2-171-1-13C-cdcl3

Pulse Sequence: CARBON (s2pul)  
Solvent: cdcl3  
Data collected on: Aug 19 2009

VARIAN 

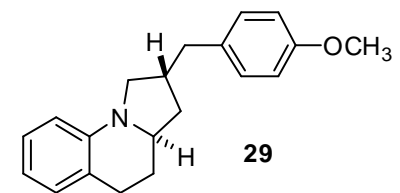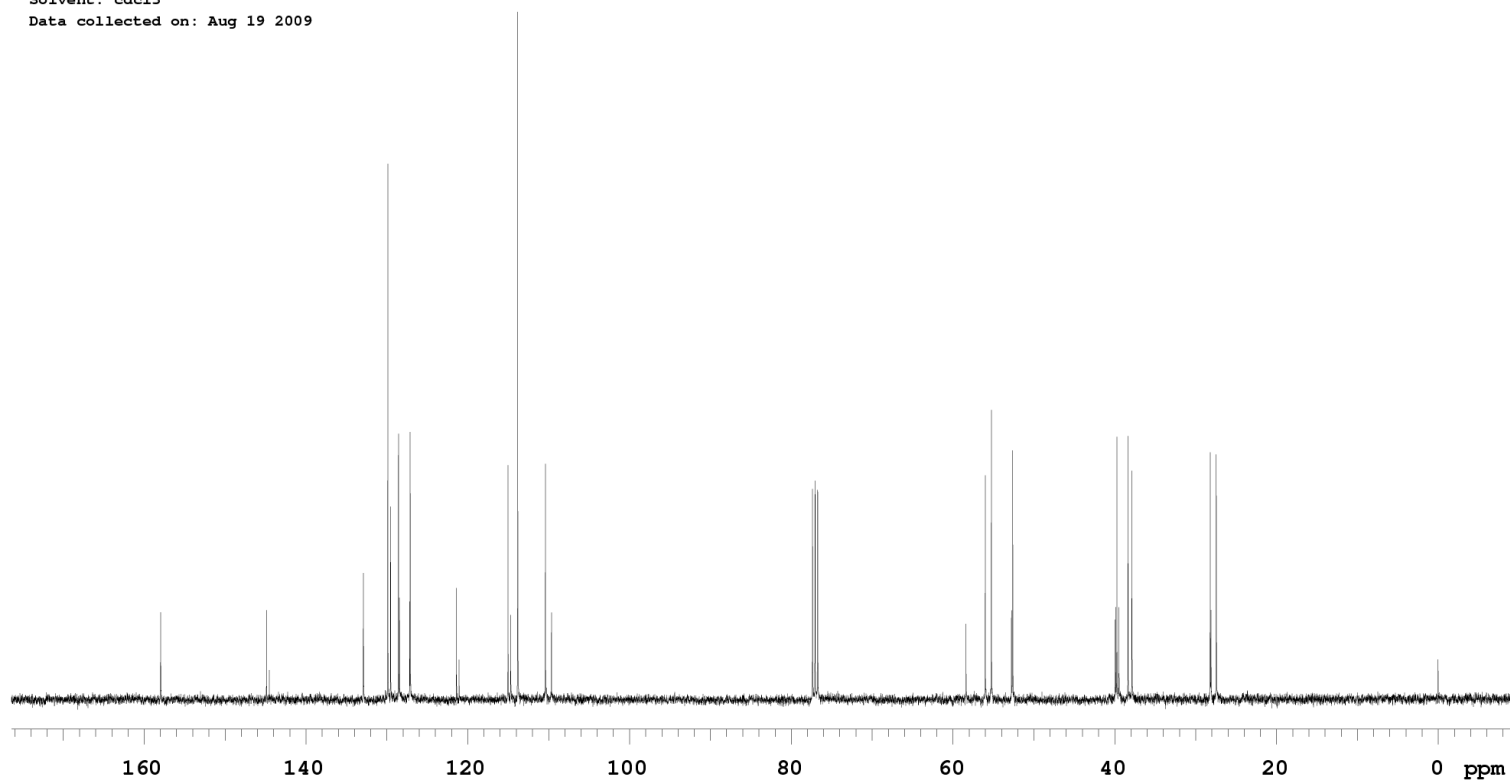

nb2-171-1

Sample Name:

Data Collected on:  
Ga.Chem.LSA.UMich.edu-vnmrs400  
Archive directory:

Sample directory:

FidFile: w-dms-nb2-171-1-2cosy

Pulse Sequence: gCOSY  
Solvent: cdcl3  
Data collected on: Aug 19 2009

Operator: danims

Relax. delay 1.000 sec  
Acq. time 0.150 sec  
Width 6410.3 Hz  
2D Width 6410.3 Hz

Single scan  
128 increments  
OBSERVE H1, 399.5389386 MHz  
DATA PROCESSING  
Sq. sine bell 0.075 sec  
F1 DATA PROCESSING  
Sq. sine bell 0.020 sec  
F1 size 2048 x 2048  
Total time 3 min 11 sec

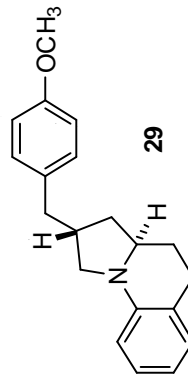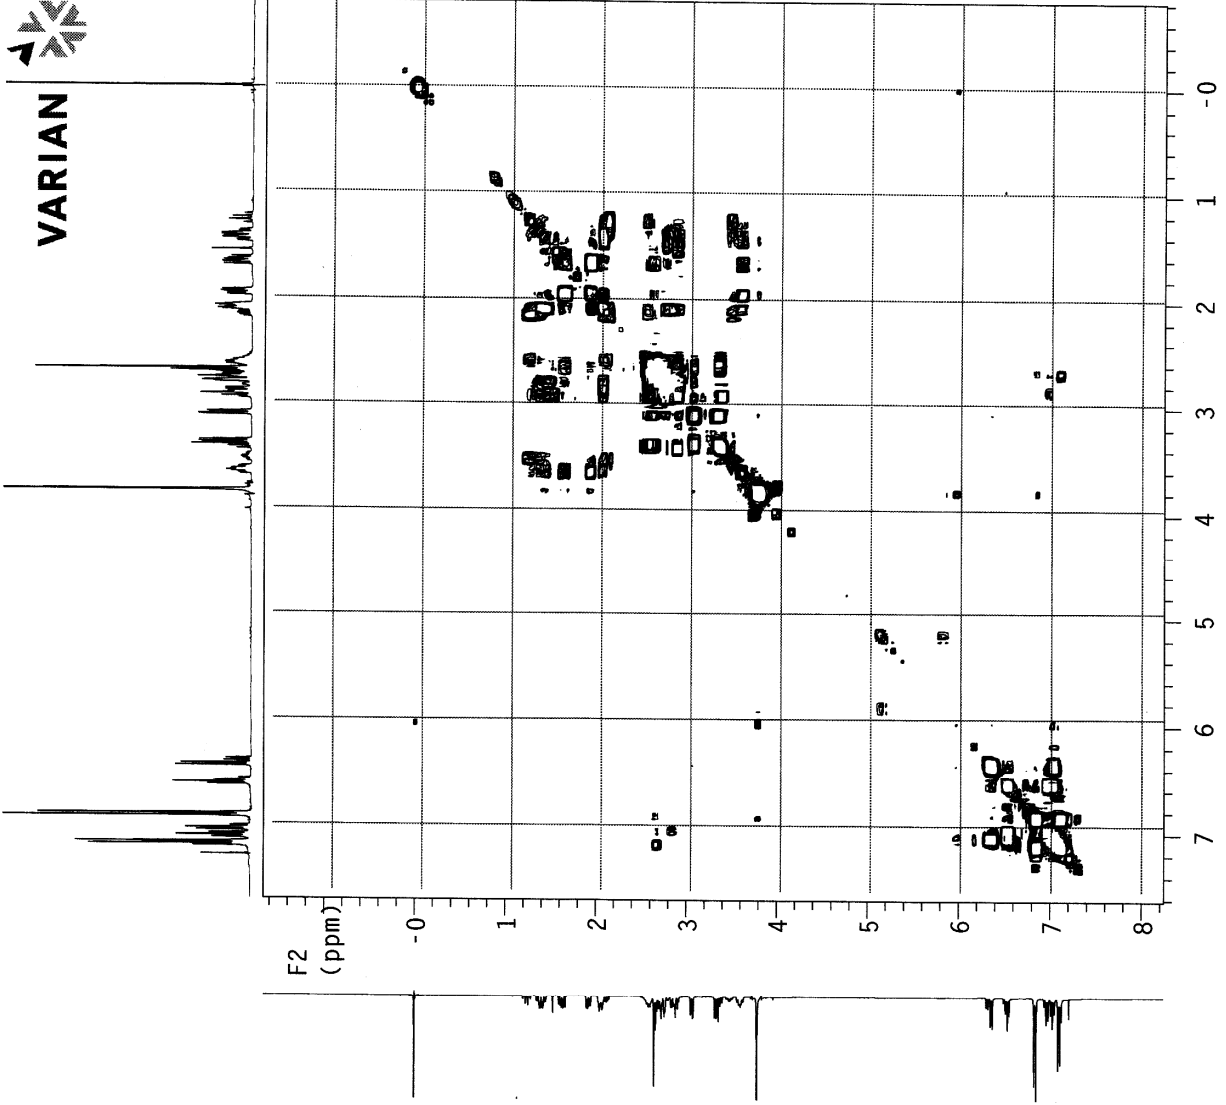

nb2-171-1

Sample Name:

Data Collected on:  
Ga.Chem..LSA:UMich.edu-vnmr-s400  
Archive directory:

Sample directory:

Fidfile: w-dms-nb2-171-1-2cosy

Pulse Sequence: gCOSY  
Solvent: cdc13  
Data collected on: Aug 19 2009

Operator: danims

Relax. delay 1.000 sec  
Acq. time 0.150 sec  
Width 6410.3 Hz  
2D Width 6410.3 Hz  
Single scan  
128 increments  
OBSERVE H1, 399.5389386 MHz  
DATA PROCESSING  
Sd. sine bell 0.075 sec  
F1 DATA PROCESSING  
Sd. sine bell 0.020 sec  
FT size 2048 x 2049  
Total time 3 min 11 sec

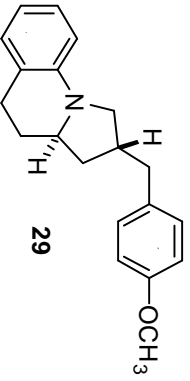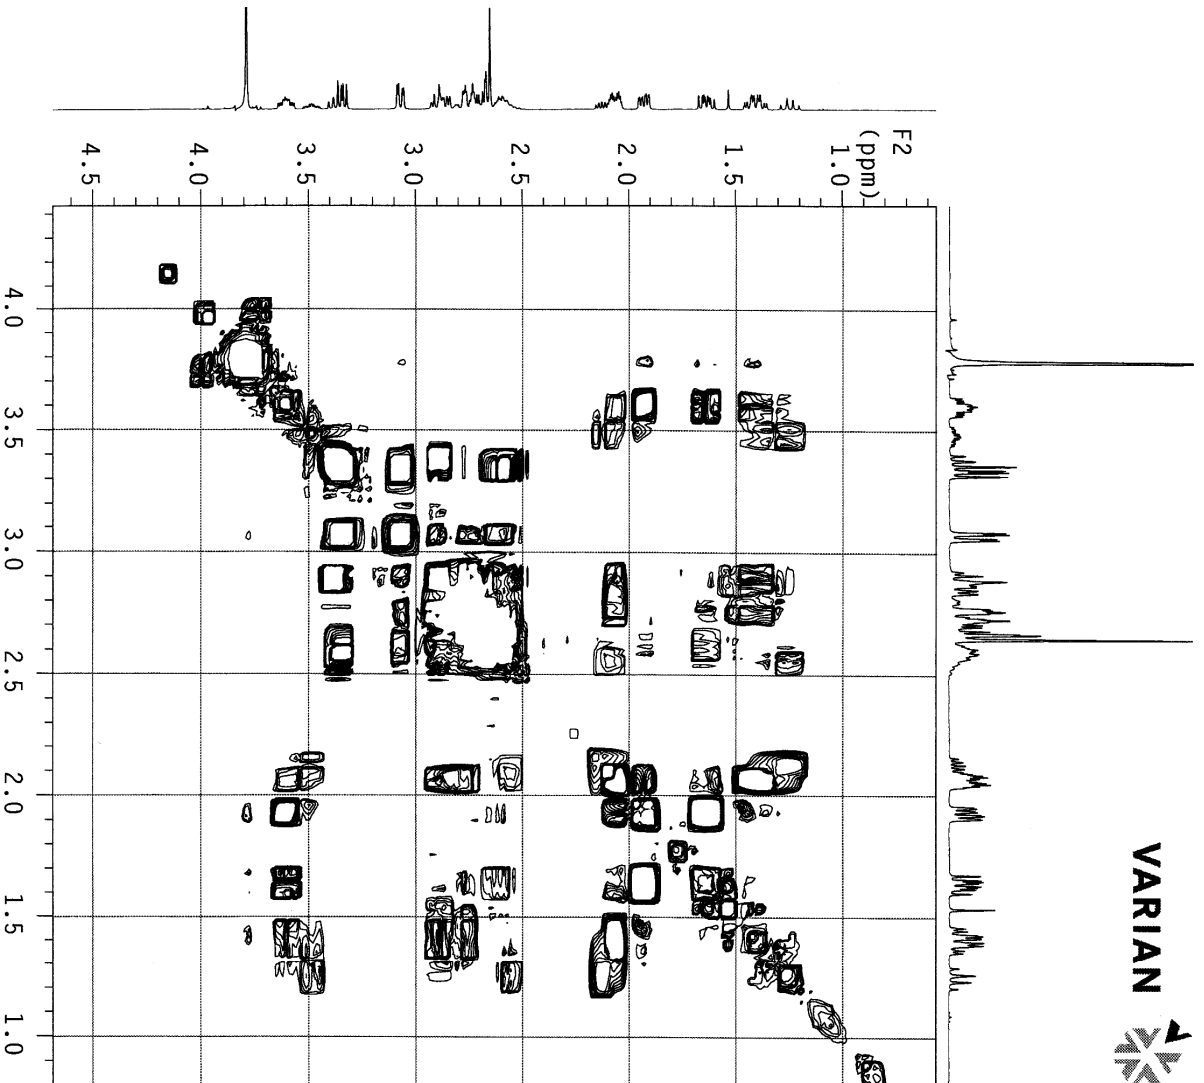

nb2-171-1

Sample Name:

Data Collected on:  
Ga. Chem. LSA, UMICH, edu-ymms400  
Archive directory:

Sample directory:

FidFile: w-dms-nb2-171-1-2noesy

Pulse Sequence: NOESY  
Solvent: cdc13  
Data collected on: Aug 19 2009

Operator: danims

Relax. delay 1.000 sec  
Acq. time 0.150 sec  
Width 6410.3 Hz  
2D Width 6410.3 Hz  
4 repetitions  
2 x 200 increments  
OBSERVE H1, 399.5389259 MHz  
DATA PROCESSING  
Gauss apodization 0.069 sec  
F1 DATA PROCESSING  
Gauss apodization 0.029 sec  
FT size 2048 x 2048  
Total time 37 min

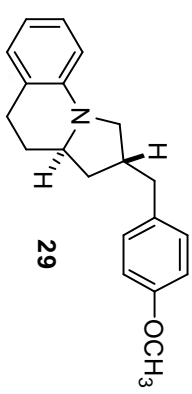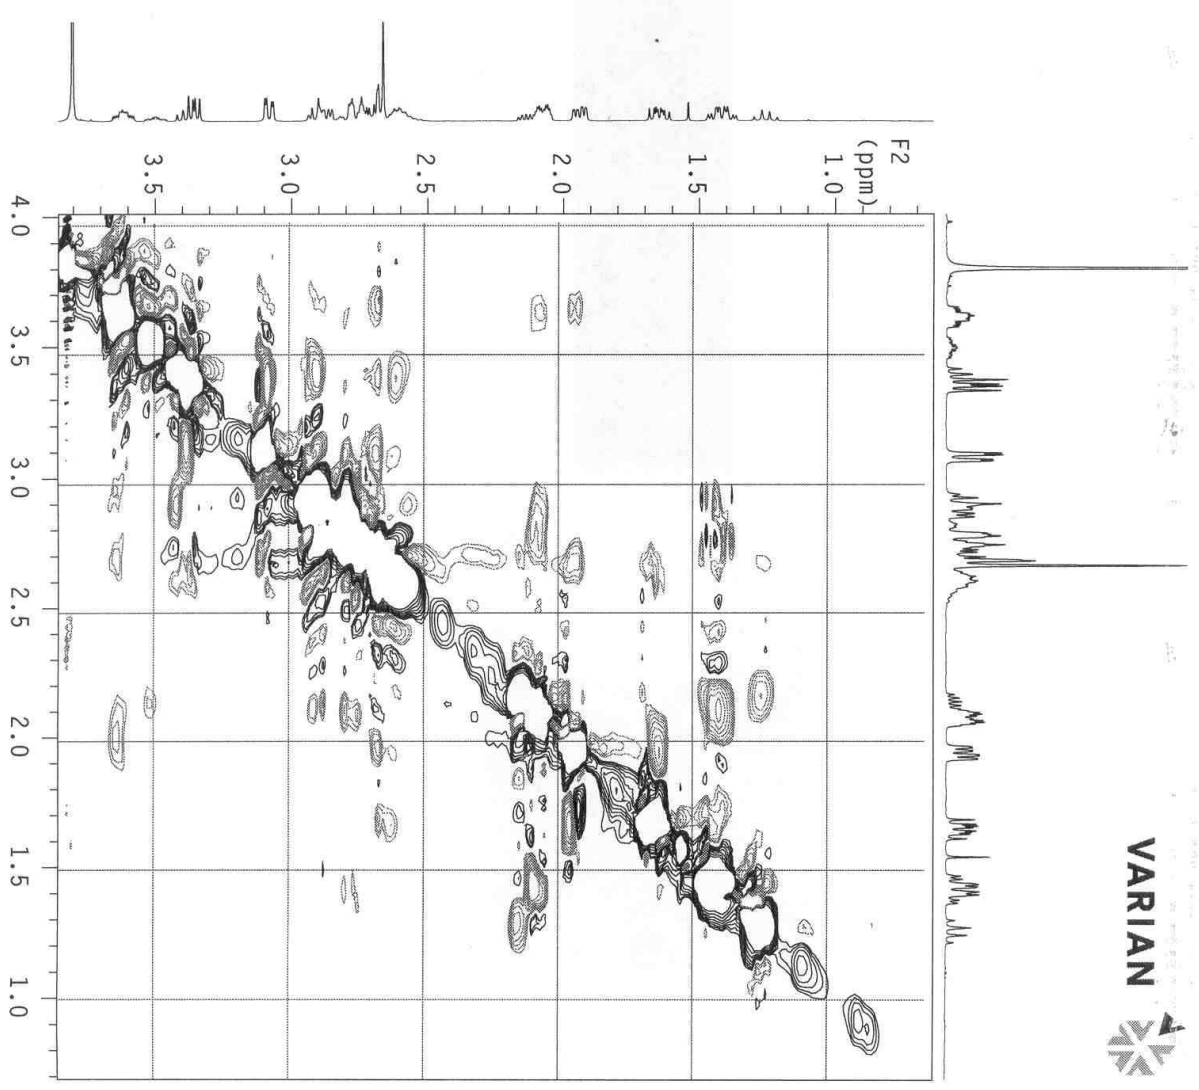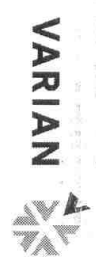

nb2-104

Sample Name:

Data Collected on:  
Zr.Chem.LSA.UMich.edu-inova400

Archive directory:

Sample directory:

FidFile: w-dms-nb2-104-1-1H

Pulse Sequence: PROTON (s2pul)  
Solvent: cdcl3  
Data collected on: Jul 7 2009

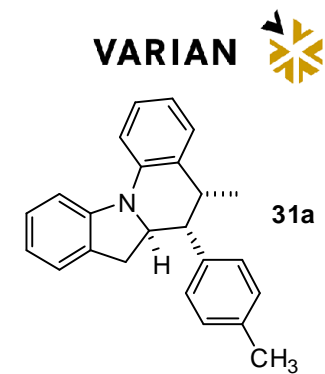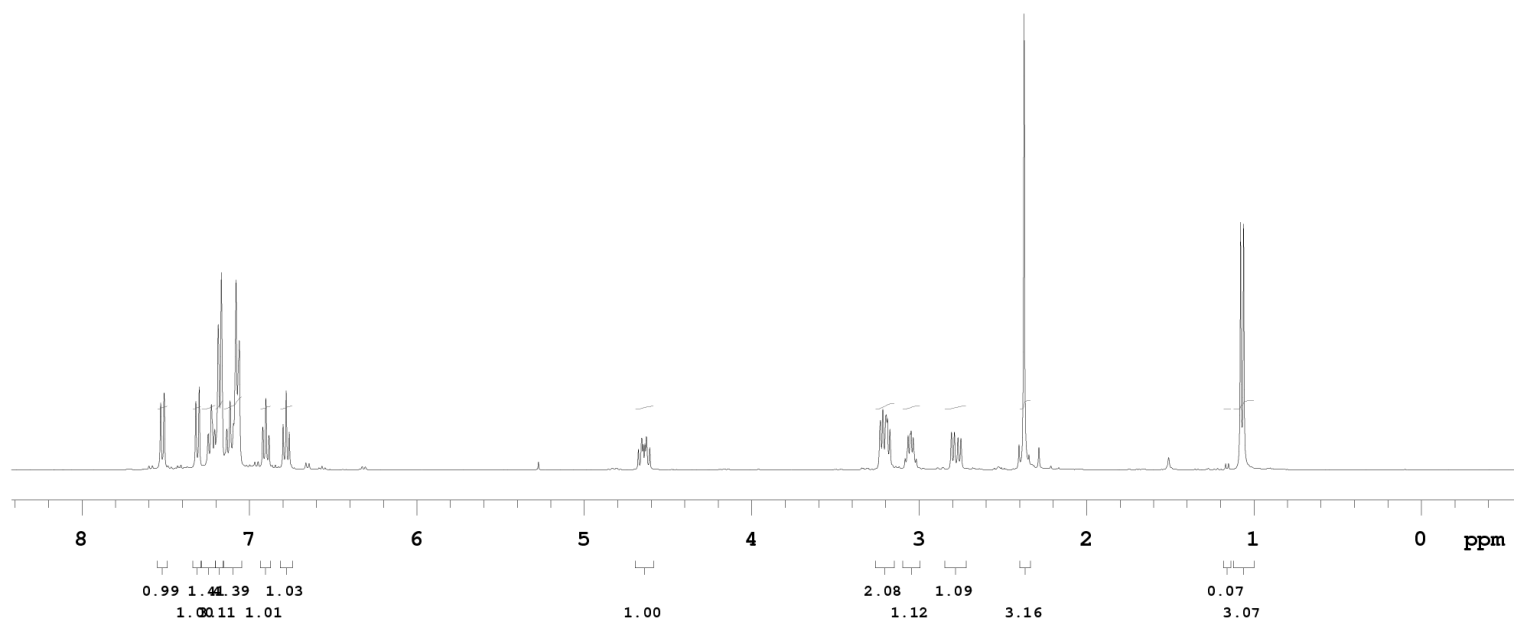

nb2-104

Sample Name:

Data Collected on:  
Zr.Chem.LSA.UMich.edu-inova400  
Archive directory:

Sample directory:

FidFile: w-dms-nb2-104-13C

Pulse Sequence: CARBON (s2pul)  
Solvent: cdcl3  
Data collected on: Jul 7 2009

VARIAN 

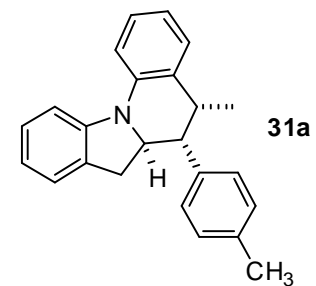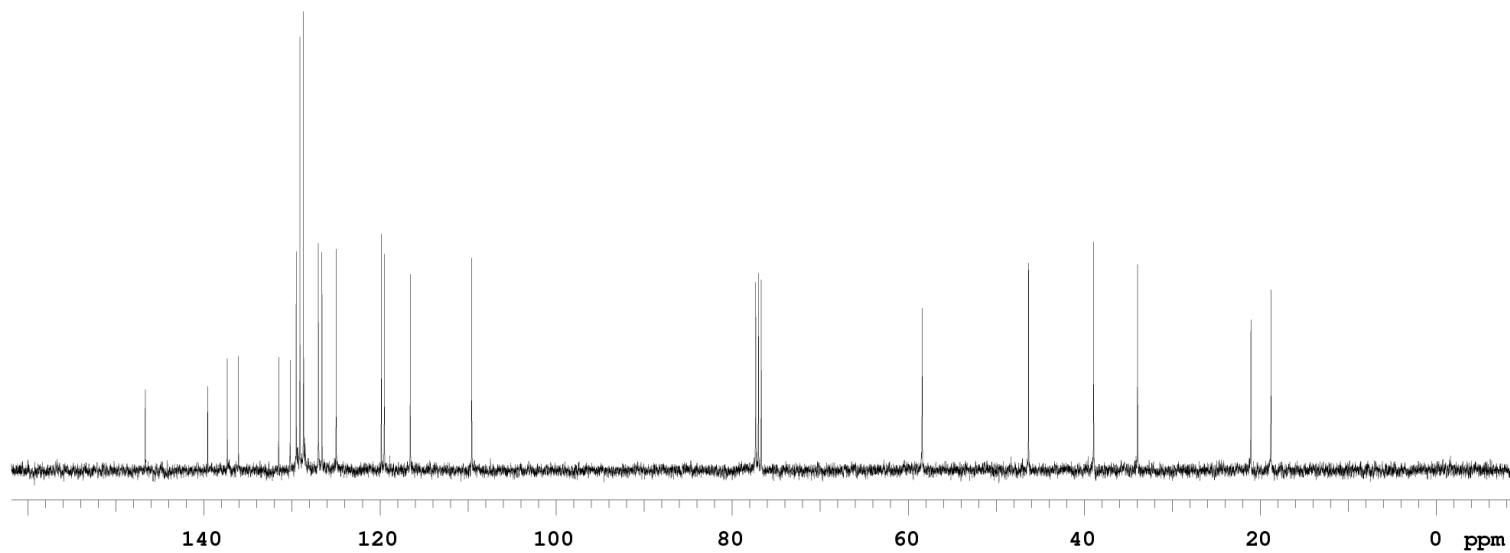



nb2-86-1-nOe

Sample Name:

Data Collected on:  
Co.Chem.LSA.UMich.Edu-vnmrs400  
Archive directory:

Sample directory:

FidFile: w-dms-nb2-86-1-1nOe

Pulse Sequence: PROTON (s2pul)  
Solvent: c6d6  
Data collected on: Feb 26 2009

VARIAN 

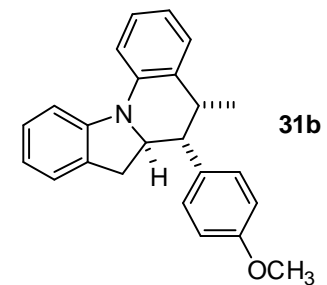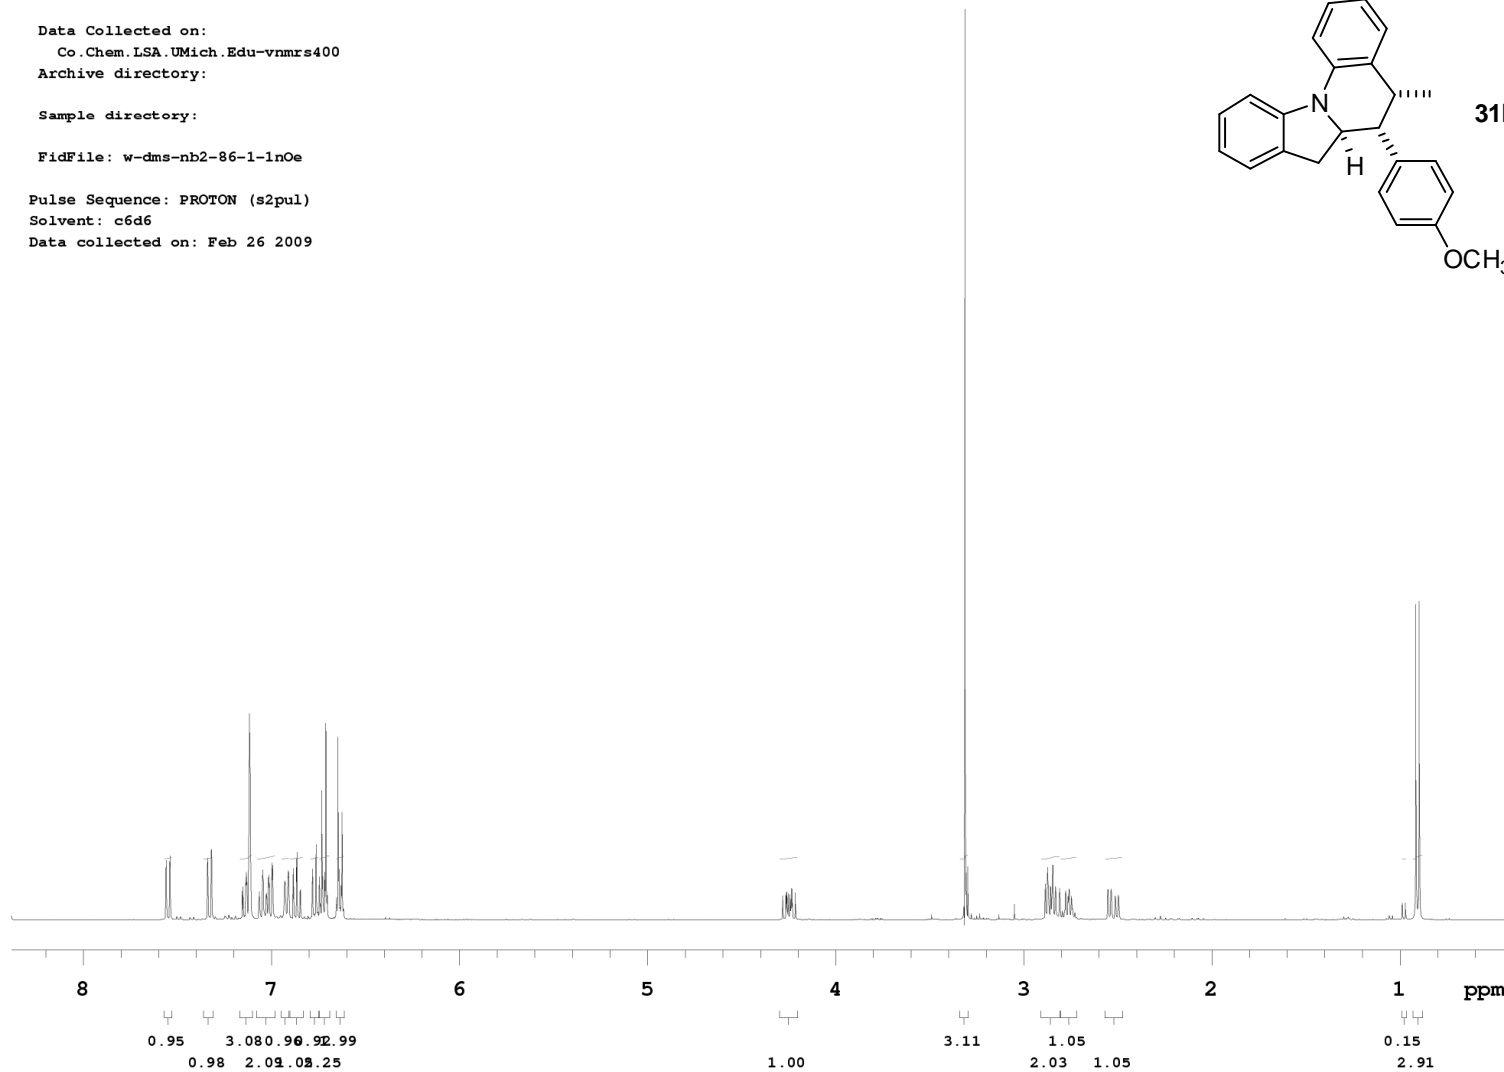

nb2-86-1-pure

Sample Name:

Data Collected on:

Zr.Chem.LSA.UMich.edu-inova400

Archive directory:

Sample directory:

FidFile: w-dms-nb2-86-1-13C

Pulse Sequence: CARBON (s2pul)

Solvent: cdcl3

Data collected on: Feb 25 2009

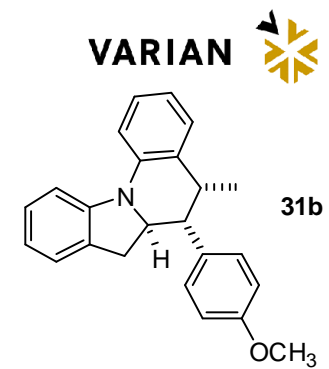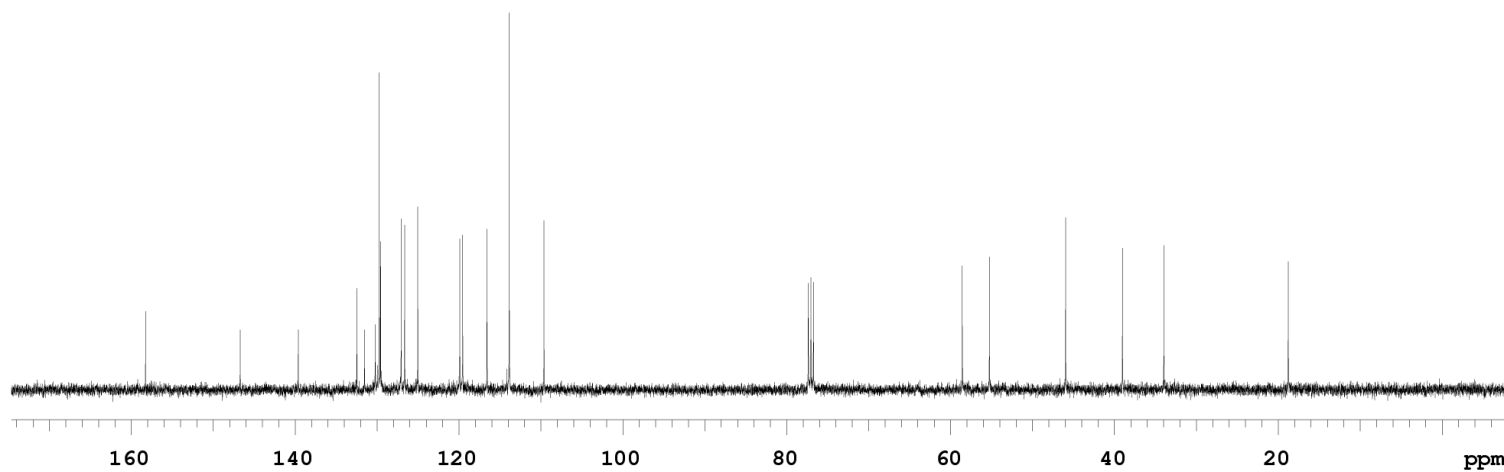

nb2-86-1-pure

Sample Name:

Data Collected on:  
Zr.Chem.LSA.UMich.edu-inova400  
Archive directory:

Sample directory:

FidFile: w-dms-nb2-86-1-2cosy

Pulse Sequence: gCOSY

Solvent: cdc13

Data collected on: Feb 25 2009

Operator: danims

Relax. delay 1.000 sec

Acq. time 0.150 sec

Width 3213.8 Hz

2D Width 3213.8 Hz

2 repetitions

128 increments

OBSERVE H1, 399.9649645 MHz

DATA PROCESSING

Sq. sine bell 0.075 sec

F1 DATA PROCESSING

Sq. sine bell 0.040 sec

FT size 1024 x 1024

Total time 3 min 13 sec

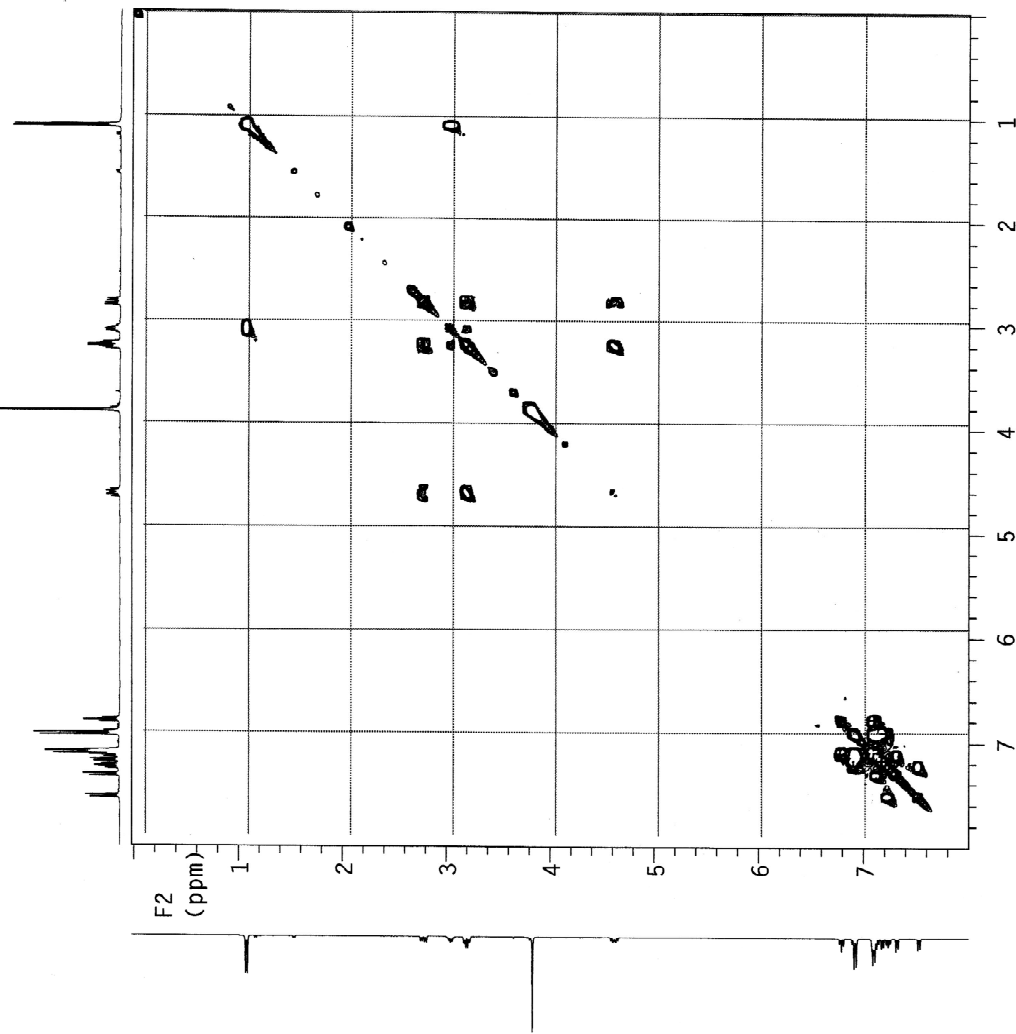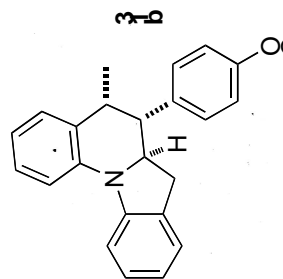

nb2-195-1

Sample Name:

Data Collected on:  
Co.Chem.LSA.UMich.edu-vnmrs400  
Archive directory:

Sample directory:

FidFile: w-dms-nb2-195-1-benzene

Pulse Sequence: PROTON (s2pul)  
Solvent: c6d6  
Data collected on: Aug 24 2009

VARIAN 

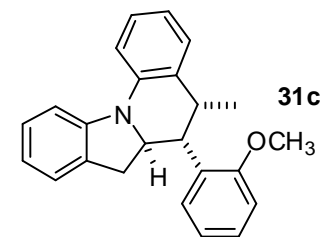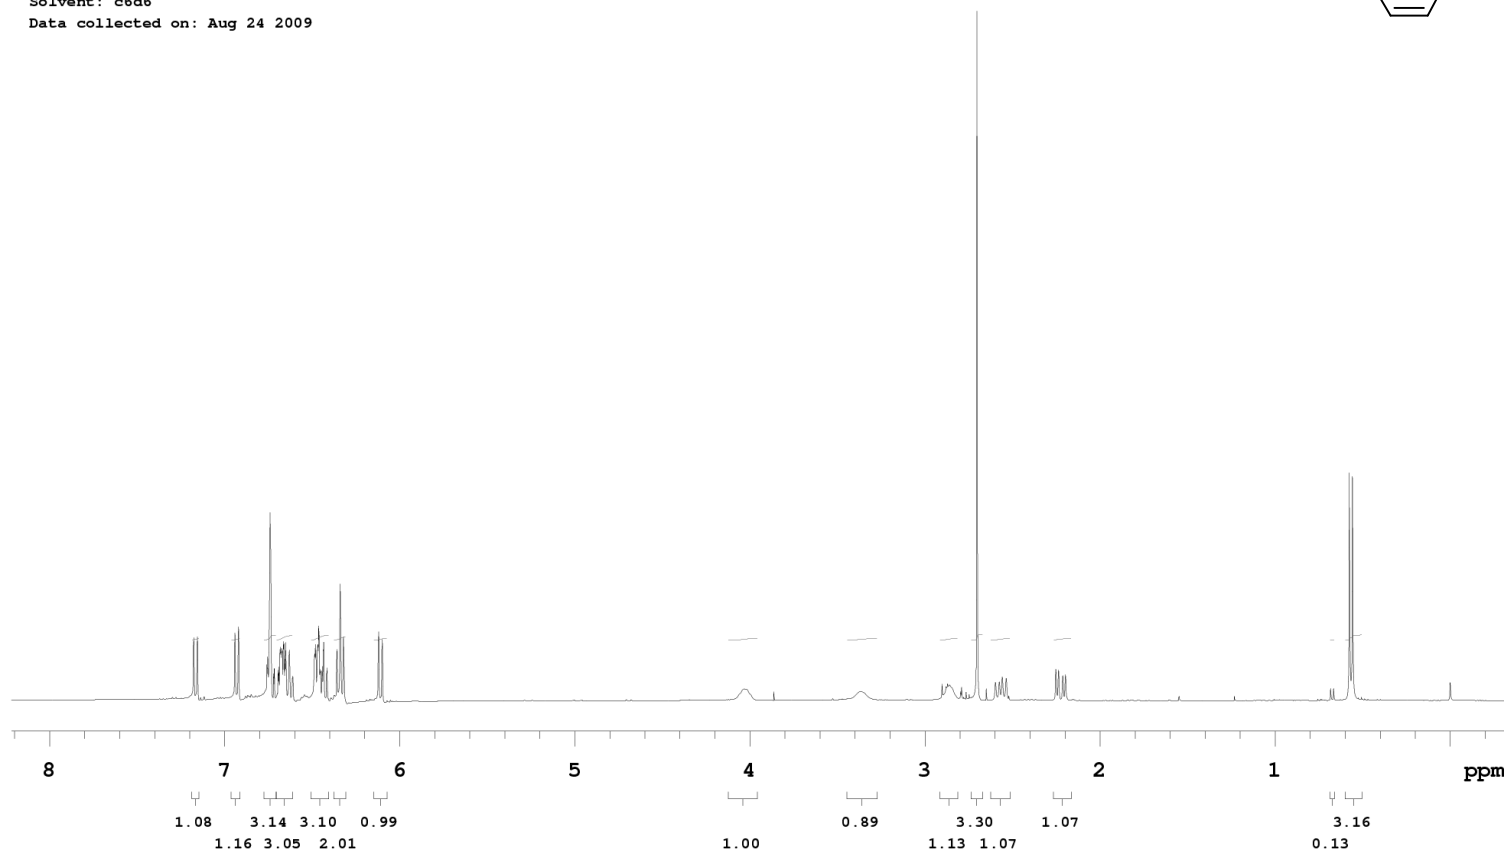

nb2-197

Sample Name:

Data Collected on:

Zr.Chem.LSA.UMich.edu-inova400

Archive directory:

/export/home/chempack/vnmrsys/data

Sample directory:

FidFile: CARBON

Pulse Sequence: CARBON (s2pul)

Solvent: cdcl3

Data collected on: Oct 16 2009

VARIAN 

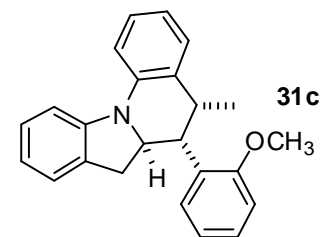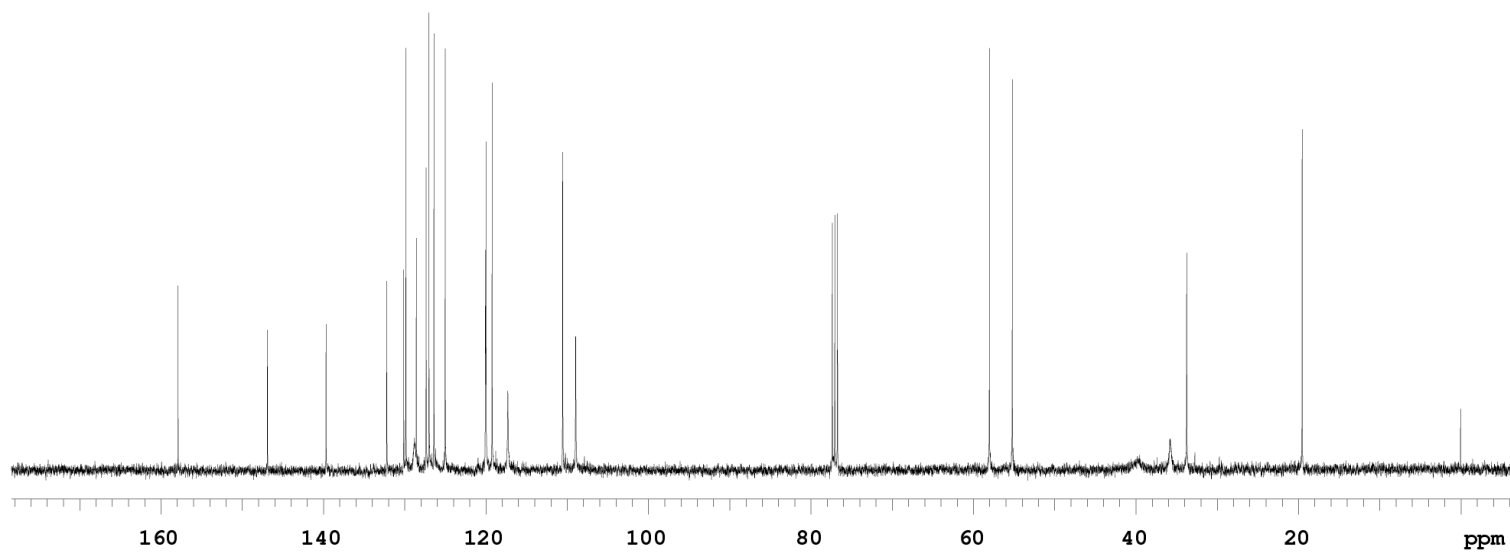

nb2-195-1

Sample Name:

Data Collected on:  
Co.Chem.LSA.UMich.edu-vmrs400  
Archive directory:

Sample directory:

FidFile: w-dms-nb2-195-1-cosybenzene

Pulse Sequence: gCOSY

Solvent: c6d6

Data collected on: Aug 24 2009

Temp. 25.0 C / 298.1 K

Operator: danims

Relax. delay 1.000 sec

Acq. time 0.150 sec

Width 6410.3 Hz

2D Width 6410.3 Hz

Single scan

128 increments

OBSERVE H1, 400.5207374 MHz

DATA PROCESSING

Sq. sine bell 0.075 sec

F1 DATA PROCESSING

Sq. sine bell 0.020 sec

FT size 2048 x 2048

Total time 3 min 11 sec

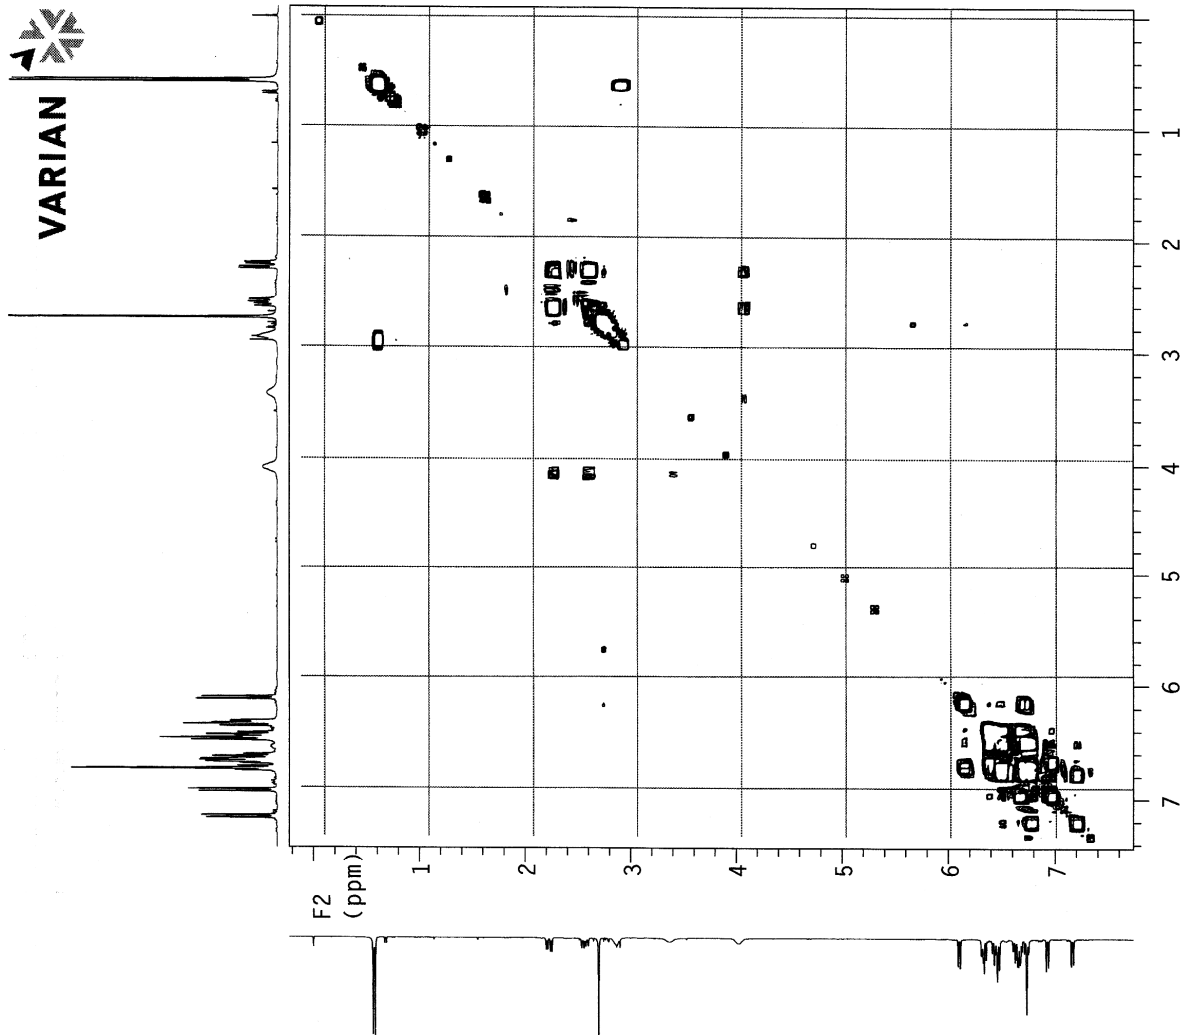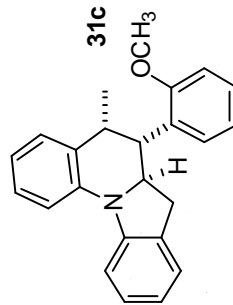

nb2-197-1

Sample Name:

Data Collected on:  
Ga.Chem.LSA.UMich.edu-vmr400  
Archive directory:

Sample directory:

FidFile: w-dms-nb2-197-1-n0e

Pulse Sequence: NOESY  
Solvent: c6d6  
Data collected on: Oct 7 2009

Temp. 35.0 C / 308.1 K  
Operator: danims

Relax. delay 1.000 sec  
Acq. time 0.150 sec  
Width 6410.3 Hz  
2D Width 6410.3 Hz  
8 repetitions  
2 x 128 increments

OBSERVE H1, 399.5389618 MHz  
DATA PROCESSING  
Gauss apodization 0.069 sec  
F1 DATA PROCESSING  
Gauss apodization 0.018 sec  
FT size 2048 x 2048  
Total time 58 min

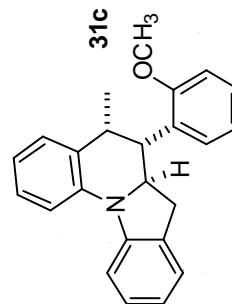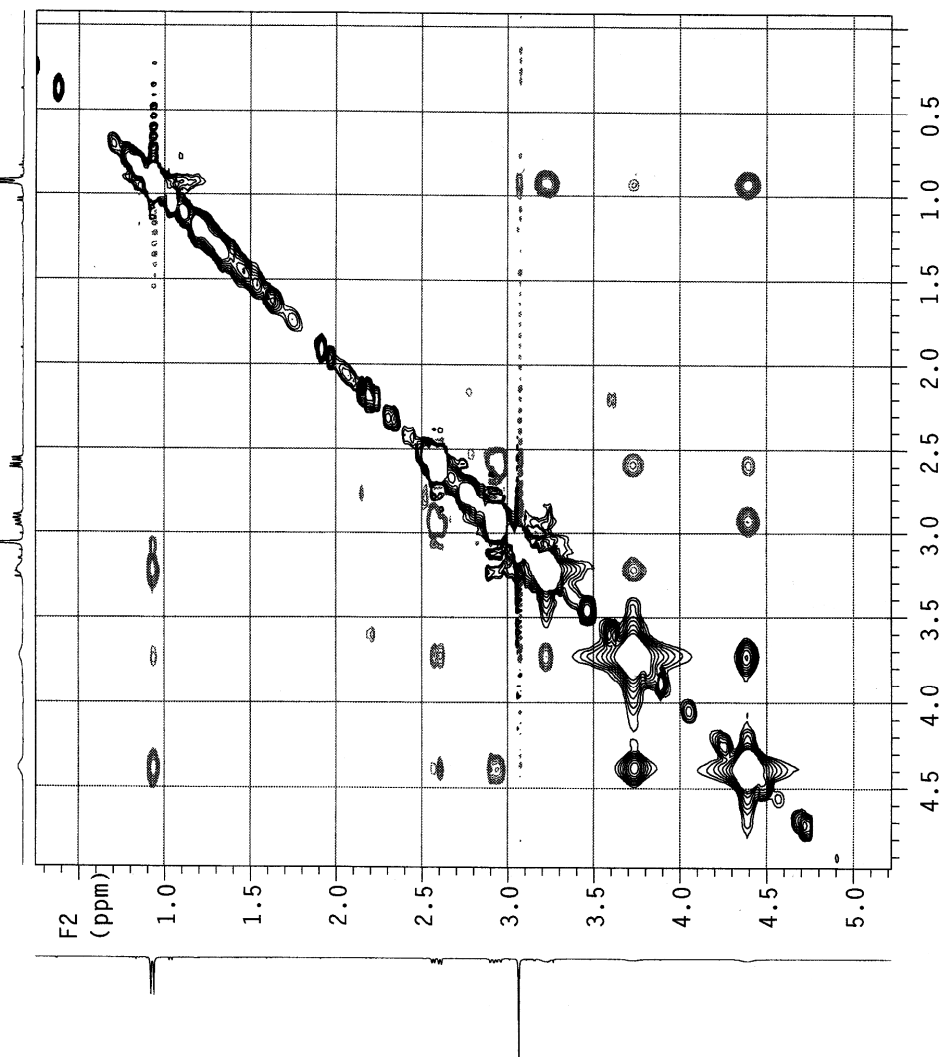

nb3-61-1

Sample Name:

Data Collected on:  
Zr.Chem.LSA.UMich.edu-inova400  
Archive directory:

Sample directory:

FidFile: w-dms-nb3-61-1-1H

Pulse Sequence: PROTON (s2pul)  
Solvent: c6d6  
Data collected on: Dec 1 2009

VARIAN 

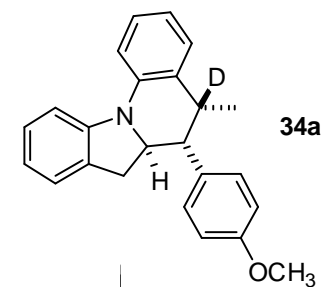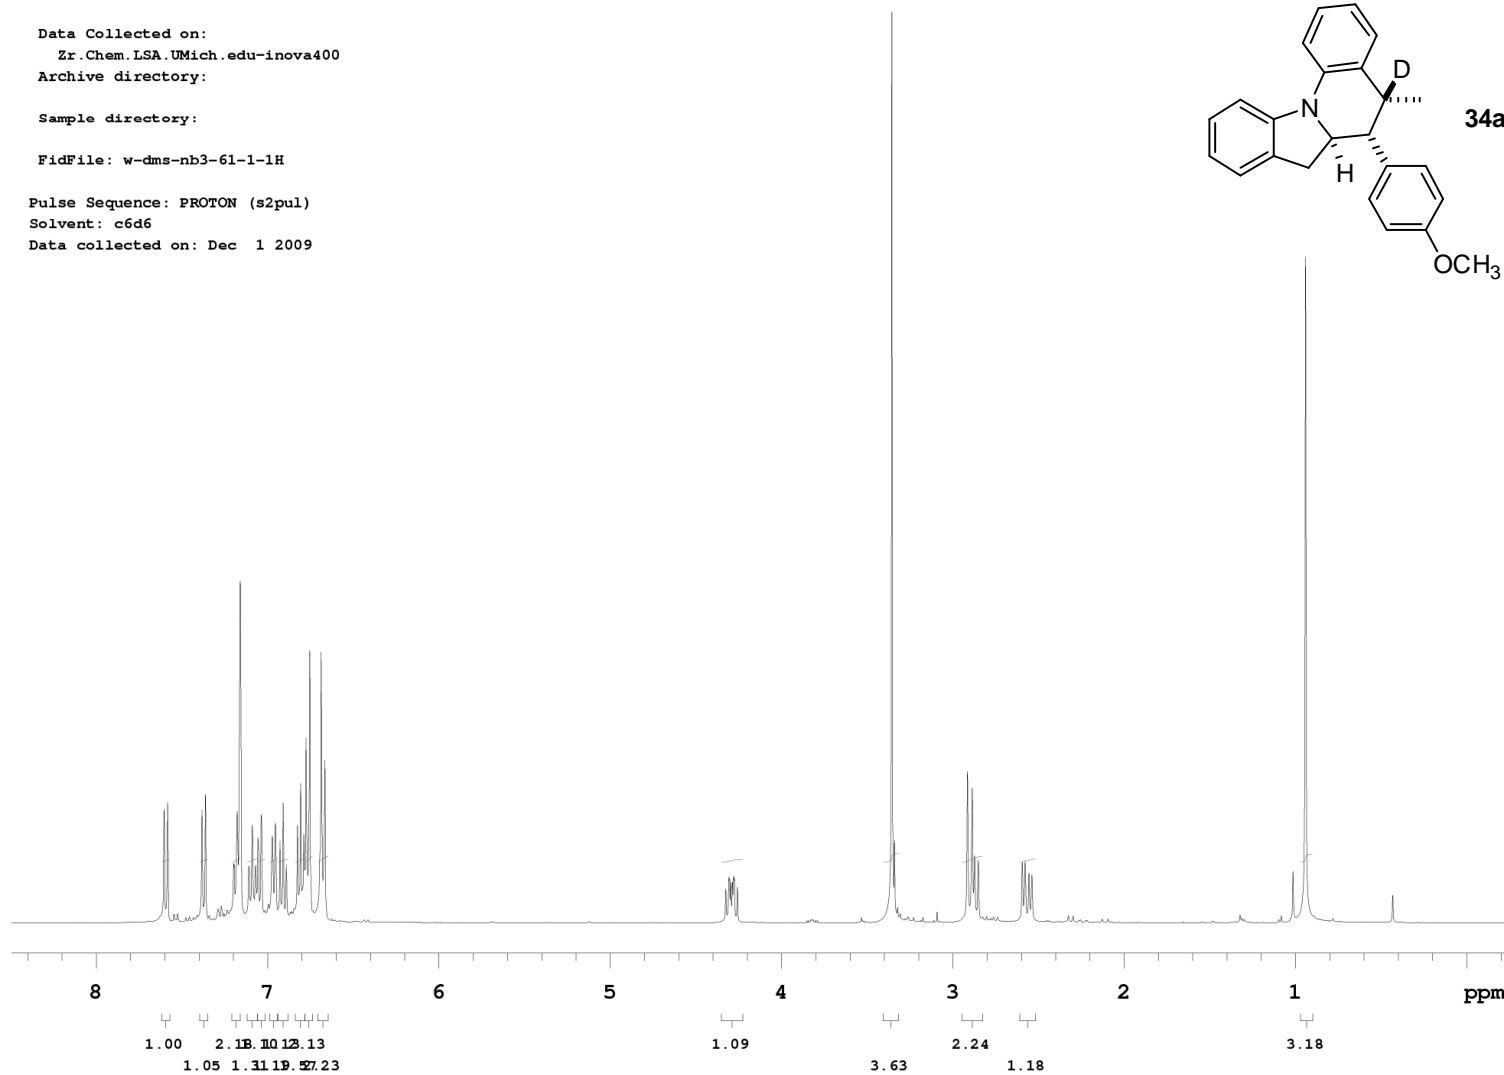



nb3-61-1-13C

Sample Name:

Data Collected on:

Zr.Chem.LSA.UMich.edu-inova400

Archive directory:

Sample directory:

FidFile: w-dms-nb3-61-1-13C

Pulse Sequence: CARBON (s2pul)

Solvent: cdcl3

Data collected on: Dec 1 2009

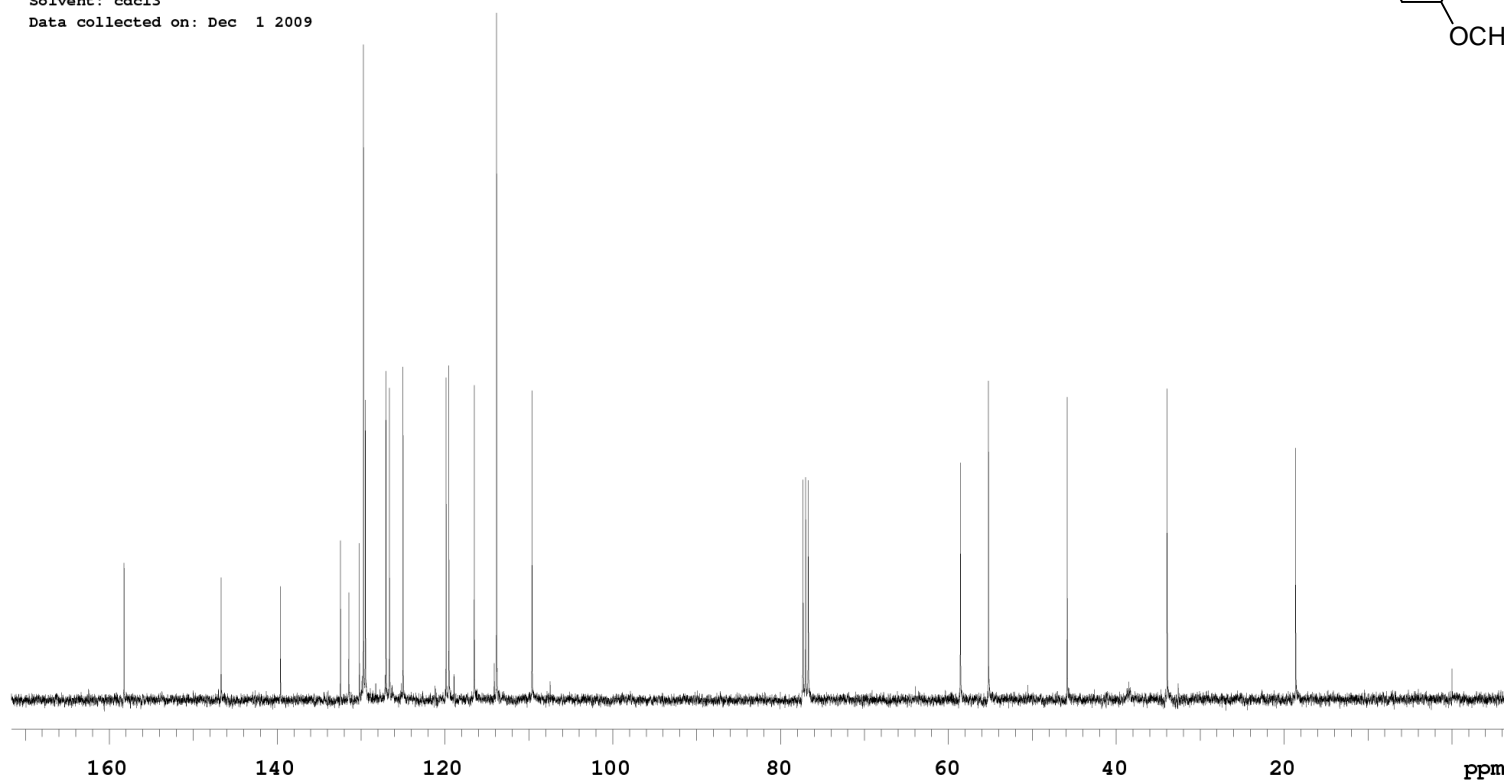

VARIAN 

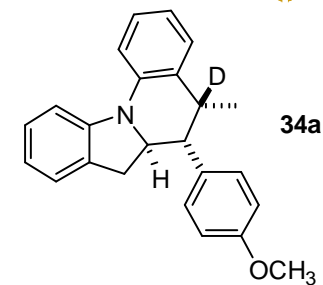

nb3-61-1

Sample Name:

Data Collected on:  
Zr.Chem.LSA.UMich.edu-inova400  
Archive directory:

Sample directory:

FidFile: w-dms-nb3-61-2-1H

Pulse Sequence: PROTON (s2pul)  
Solvent: c6d6  
Data collected on: Dec 1 2009

VARIAN 

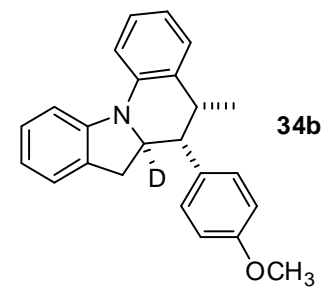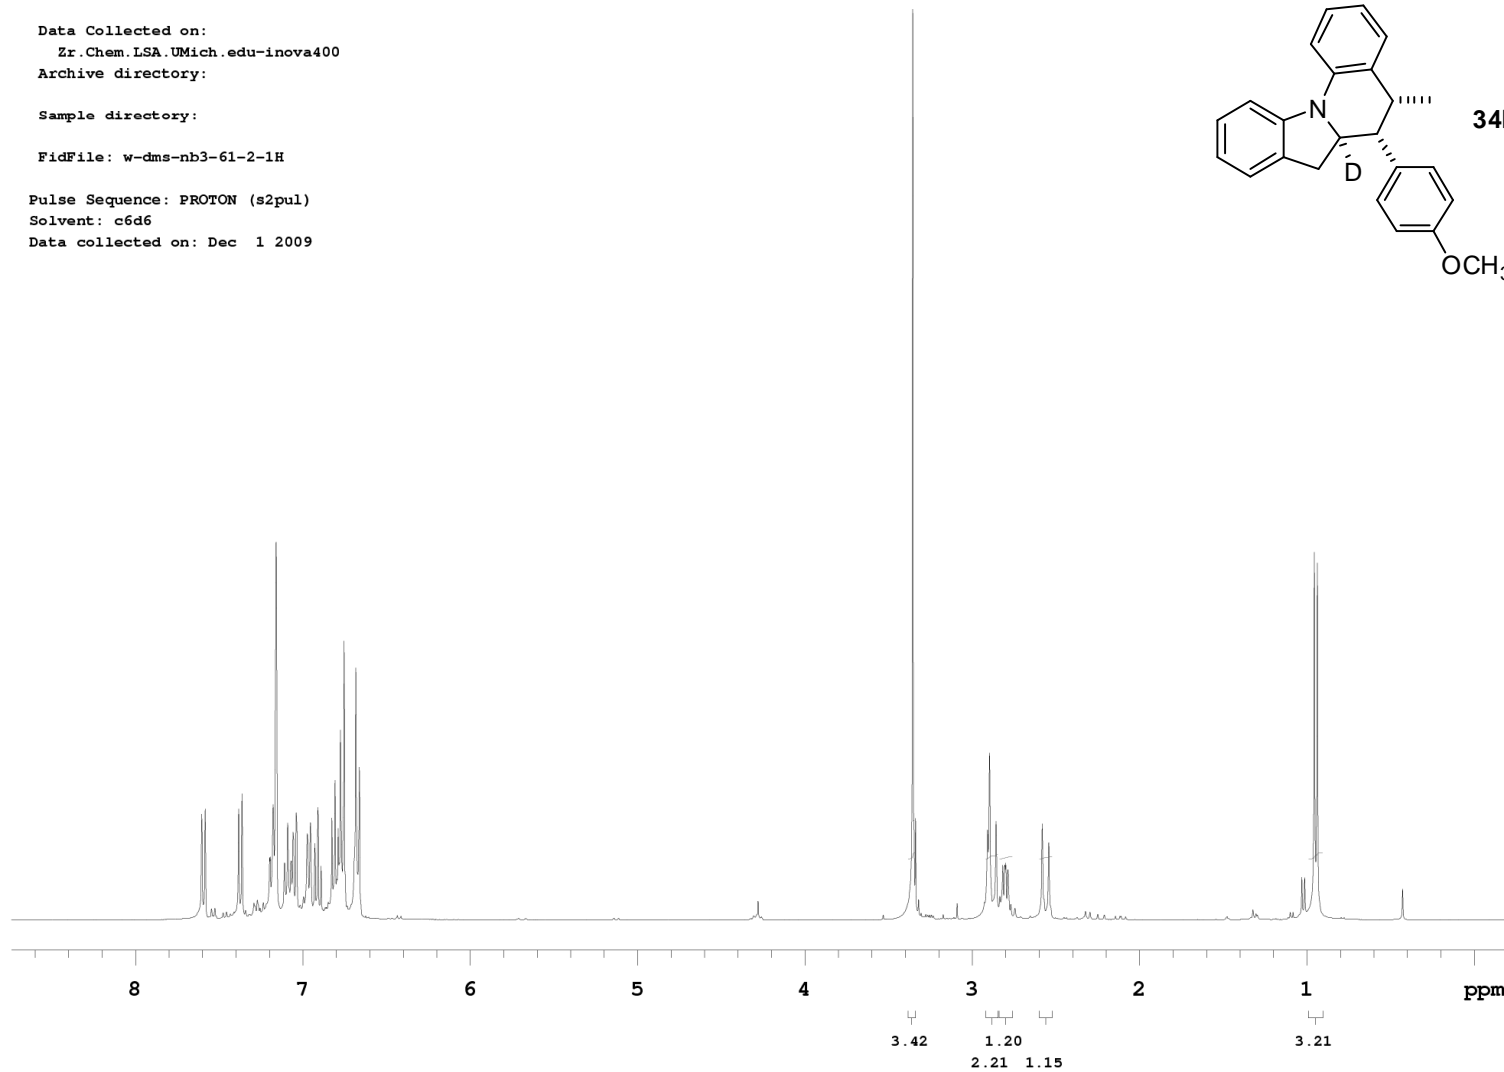

nb3-61-2-13C

Sample Name:

Data Collected on:

Zr.Chem.LSA.UMich.edu-inova400

Archive directory:

Sample directory:

FidFile: w-dms-nb3-61-2-13C

Pulse Sequence: CARBON (s2pul)

Solvent: cdcl3

Data collected on: Dec 1 2009

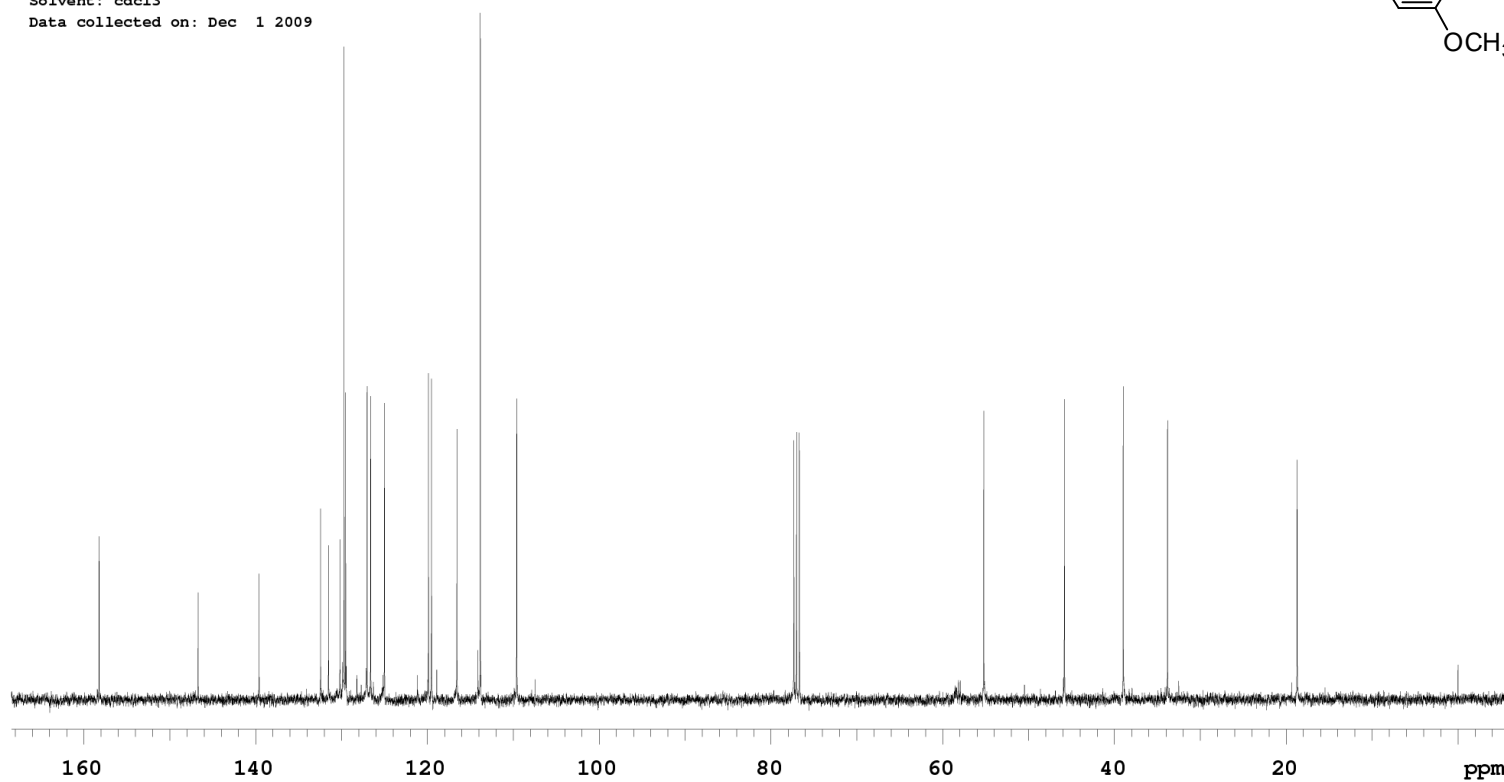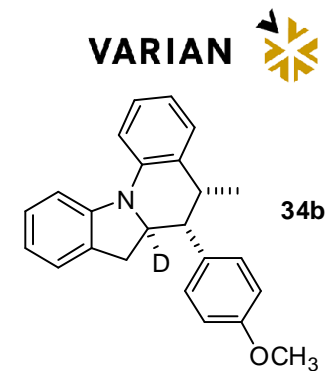

nb3-103-1

Sample Name:

Data Collected on:

Zr.Chem.LSA.UMich.edu-inova400

Archive directory:

Sample directory:

FidFile: w-dms-nb3-103-1-1H-C6D6

Pulse Sequence: PROTON (s2pul)

Solvent: c6d6

Data collected on: Dec 9 2009

VARIAN 

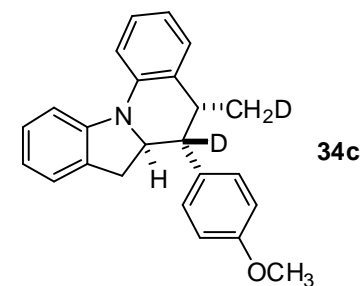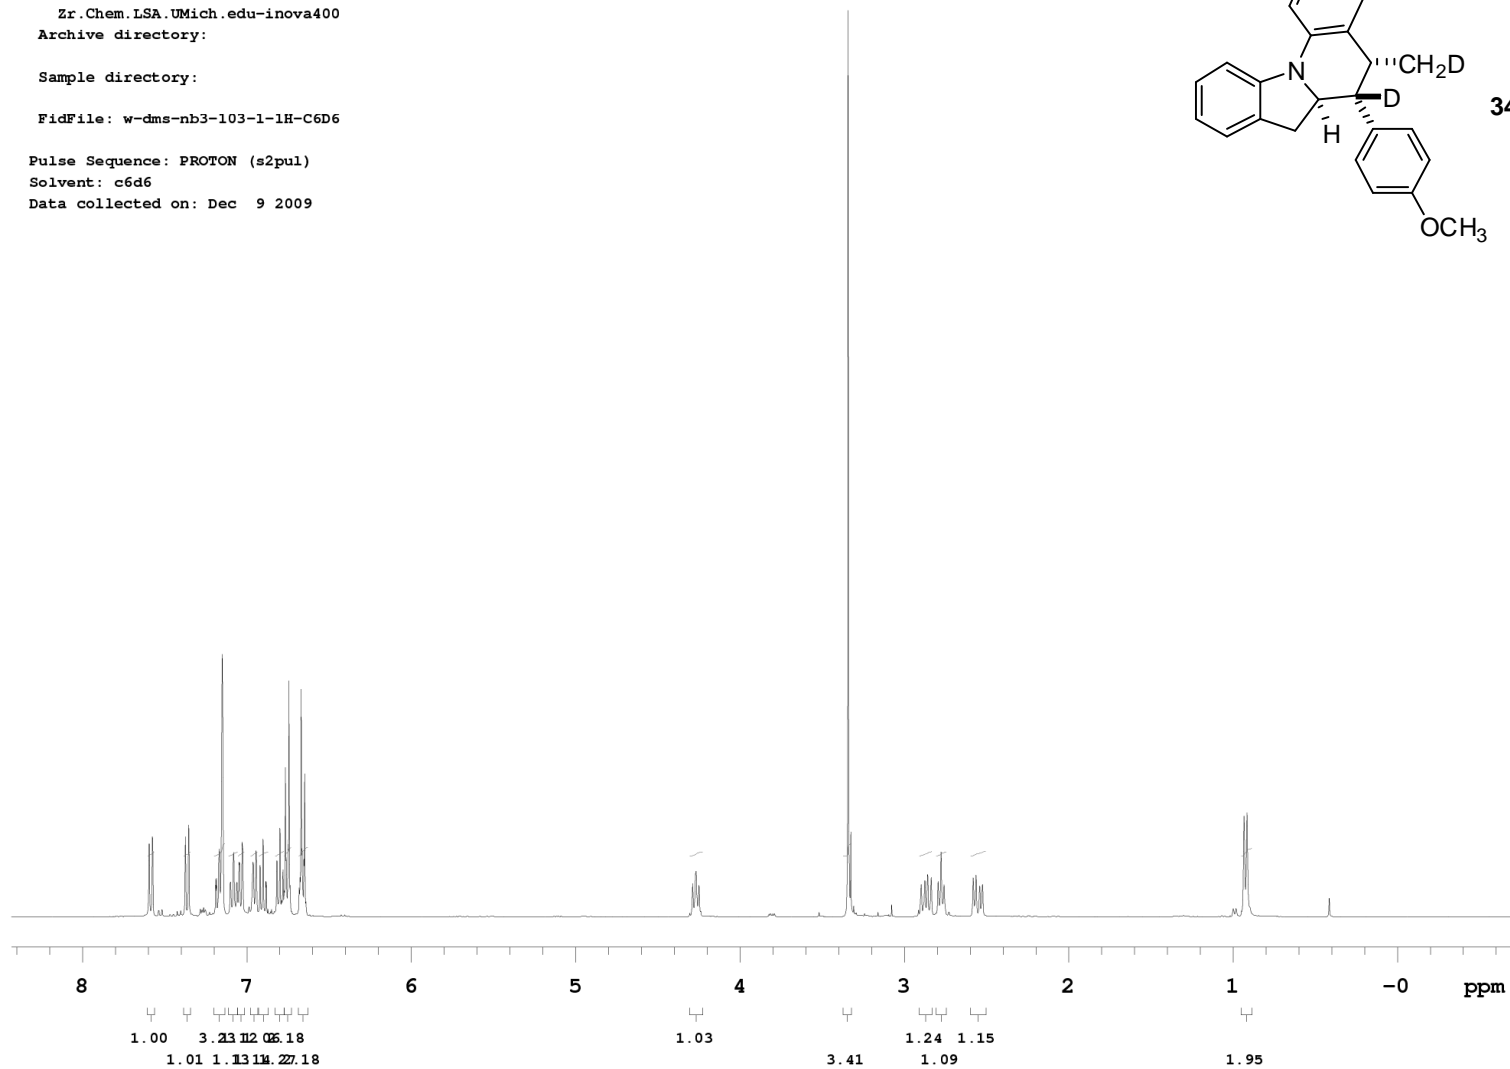

S101

nb3-103-1

Sample Name:

Data Collected on:

Zr.Chem.LSA.UMich.edu-inova400

Archive directory:

Sample directory:

FidFile: w-dms-nb3-103-13C

Pulse Sequence: CARBON (s2pul)

Solvent: cdcl3

Data collected on: Dec 9 2009

VARIAN 

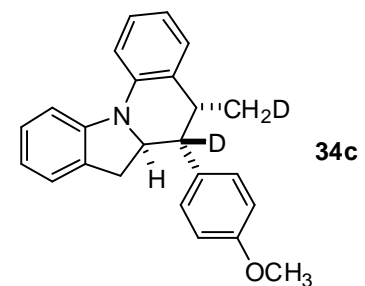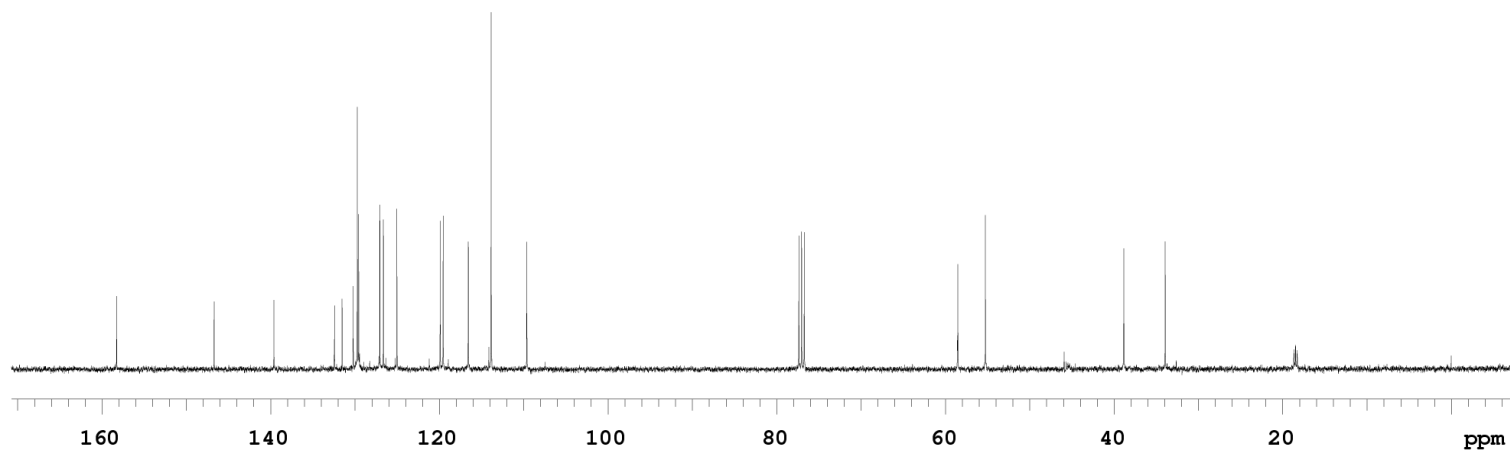

Supplement: NIHMS177977-supplement-2_si_002.pdf [file NIHMS177977-supplement-2_si_002.pdf]
